# Supplementary material
Source: publisher figshare collection journal article supplement (https://gsapubs.figshare.com/ndownloader/files/22409043)
Supplement: Supplementary file 1 [file 22409043]

## Sheet: Sheet1
Uncertainties shown in these tables are at the 1-sigma level, and include only measurement errors. Interpreted ages are based on 206Pb/ 238U for <1000 Ma grains and on 206Pb/ 207Pb for >1000 Ma grains. This division at 1000 Ma results from the increasing uncertainty of 206Pb/ 238U ages and the decreasing uncertainty of 206Pb/ 207Pb ages as a function of age. Analyses that are >30% discordant (by …
1 - Susitna River (@ mouth)
							Isotope ratios						Apparent ages (Ma)
Analysis	U	206Pb	U/Th	206Pb*	±	207Pb*	±	206Pb*	±	error	206Pb*	±	207Pb*	±	206Pb*	±	Best age	±	Conc
	(ppm)	204Pb		207Pb*	(%)	235U*	(%)	238U	(%)	corr.	238U*	(Ma)	235U	(Ma)	207Pb*	(Ma)	(Ma)	(Ma)	(%)
1-1	595.312	6708	5.88492	22.3853	18.007	0.0620368	18.6697	0.0100719	4.93	0.264065	64.6029	3.16902	61.1145	11.0737	-73.4773	443.185	64.6029	3.16902	-87.9223
1-2	749.374	10422	5.0479	21.3346	6.19042	0.0978824	6.30001	0.0151456	1.17	0.185714	96.9029	1.12529	94.8198	5.70328	42.7101	148.133	96.9029	1.12529	226.885
1-3	1268.75	9459	5.18997	20.6788	4.23632	0.067281	4.61073	0.0100906	1.82	0.394731	64.7222	1.17205	66.1159	2.95131	116.87	99.958	64.7222	1.17205	55.3798
1-4	638.797	12609	5.70702	20.8262	5.9184	0.100417	5.9529	0.0151676	0.64	0.107511	97.0426	0.616421	97.1616	5.51588	100.069	140.079	97.0426	0.616421	96.9757
1-5	1007.89	3966	2.79066	23.9063	11.3036	0.0316006	11.4191	0.00547906	1.62	0.141868	35.2239	0.569071	31.5901	3.55178	-236.739	286.009	35.2239	0.569071	-14.8788
1-6	431.398	43950	4.77787	20.8863	13.452	0.0651702	14.7995	0.00987208	6.17	0.416906	63.3274	3.88817	64.1058	9.1943	93.2386	319.817	63.3274	3.88817	67.9198
1-7	208.694	9750	3.29797	19.3509	8.28062	0.211664	8.51638	0.0297061	1.99	0.233667	188.709	3.70087	194.948	15.1071	271.131	190.099	188.709	3.70087	69.6005
1-8	349.882	3357	5.84734	18.7687	17.2362	0.0398337	17.3331	0.00542228	1.83	0.105579	34.8599	0.636214	39.6616	6.74214	340.775	392.803	34.8599	0.636214	10.2296
1-9	558.304	18414	3.85013	20.0329	9.89917	0.0610398	10.2174	0.00886862	2.53	0.247618	56.9188	1.43371	60.1608	5.96836	191.19	230.718	56.9188	1.43371	29.7708
1-10	84.9555	11505	4.16271	13.8687	12.9163	0.641912	13.5484	0.0645667	4.09	0.301881	403.338	15.9911	503.489	53.8331	988.893	263.792	403.338	15.9911	40.7869
1-11	1381.05	29319	1.88825	20.8759	5.38201	0.0643907	5.64713	0.00974916	1.71	0.302809	62.5428	1.06431	63.3625	3.46882	94.427	127.521	62.5428	1.06431	66.234
1-12	266.653	16947	1.81554	24.1076	16.77	0.0775367	17.3427	0.0135569	4.42	0.254863	86.8062	3.81112	75.8264	12.672	-257.948	427.478	86.8062	3.81112	-33.6526
1-13	1128.84	8868	2.67531	18.4037	10.9523	0.0673553	11.0064	0.00899033	1.09	0.0990334	57.6964	0.626085	66.1866	7.05252	385.016	246.694	57.6964	0.626085	14.9854
1-14	842.454	12174	11.4991	21.0061	7.46771	0.0456449	8.98147	0.00695403	4.99	0.555588	44.6734	2.2215	45.3204	3.98096	79.6713	177.521	44.6734	2.2215	56.0722
1-15	1923.68	9846	6.84234	21.5395	2.55747	0.0577597	2.94487	0.00902316	1.46	0.495777	57.9061	0.841644	57.0169	1.6328	19.8071	61.4007	57.9061	0.841644	292.351
1-16	5225.15	8180	2.94782	21.0743	4.98994	0.0393174	5.01493	0.00600949	0.5	0.0997023	38.6237	0.192541	39.1574	1.92634	72.0129	118.718	38.6237	0.192541	53.6344
1-17	1419.43	5188	3.127	20.722	2.15131	0.0635247	2.35578	0.00954712	0.96	0.407508	61.2528	0.585242	62.536	1.42876	111.916	50.781	61.2528	0.585242	54.731
1-18	3971.51	15480	7.24019	21.3072	2.00664	0.0597901	2.09158	0.00923961	0.59	0.282083	59.2889	0.348201	58.9642	1.19816	45.8228	47.9556	59.2889	0.348201	129.387
1-19	702.196	6390	3.32152	21.5969	4.32156	0.0949995	4.49047	0.0148803	1.22	0.271687	95.2179	1.15312	92.15	3.95577	13.4144	103.927	95.2179	1.15312	709.82
1-20	5645.74	9982	4.50698	19.3147	13.6327	0.0423283	13.786	0.00592948	2.05	0.148702	38.111	0.778971	42.0947	5.68457	275.423	313.533	38.111	0.778971	13.8373
1-21	493.037	2626	4.7096	22.0299	6.48885	0.0706546	7.38212	0.0112889	3.52	0.476828	72.3651	2.53301	69.3204	4.94658	-34.4944	157.557	72.3651	2.53301	-209.788
1-22	2193.27	13066	5.8502	21.6884	3.494	0.0547058	3.59828	0.00860517	0.86	0.239003	55.2352	0.472993	54.0812	1.89508	3.25708	84.1899	55.2352	0.472993	1695.85
1-23	804.864	7482	4.44465	20.9481	4.58115	0.0690064	4.70904	0.0104841	1.09	0.23147	67.2333	0.729035	67.7561	3.08655	86.2782	108.693	67.2333	0.729035	77.9261
1-24	587.019	1904	4.90724	19.8752	4.01505	0.0637297	4.61233	0.00918655	2.27	0.492159	58.9499	1.33206	62.7317	2.80583	209.534	93.1128	58.9499	1.33206	28.1338
1-25	1303.23	10760	3.66435	21.0737	5.01808	0.0601069	5.06667	0.00918681	0.7	0.138158	58.9516	0.41078	59.2677	2.91695	72.0509	119.387	58.9516	0.41078	81.8194
1-26	380.77	2644	6.0751	23.0955	12.2442	0.0518779	12.5449	0.00868978	2.73	0.217619	55.7759	1.51612	51.3551	6.2823	-150.399	304.739	55.7759	1.51612	-37.0854
1-27	195.587	17302	2.35794	8.21536	3.46007	5.24231	5.00764	0.312354	3.62	0.722895	1752.28	55.5436	1859.52	42.7265	1981.62	61.6139	1981.62	61.6139	88.4267
1-28	846.502	8338	3.46502	20.7164	4.83542	0.0997199	5.18082	0.0149829	1.86	0.359016	95.8695	1.76998	96.5178	4.77015	112.559	114.17	95.8695	1.76998	85.1724
1-29	2000.92	16422	10.2639	21.8334	3.42226	0.0595693	3.65031	0.00943283	1.27	0.347916	60.5229	0.765044	58.7526	2.08378	-12.802	82.6898	60.5229	0.765044	-472.762
1-30	462.533	5402	5.94871	20.1762	7.5468	0.100376	7.69442	0.0146882	1.5	0.194946	93.9979	1.39974	97.1236	7.12694	174.542	176.302	93.9979	1.39974	53.8541
1-31	501.874	6320	6.88466	20.8595	8.55187	0.101321	8.59909	0.0153285	0.9	0.104662	98.0645	0.875901	97.9949	8.03298	96.3173	202.733	98.0645	0.875901	101.814
1-32	1799.13	11218	6.26593	21.5662	3.53371	0.0576484	4.24932	0.00901695	2.36	0.555383	57.8665	1.35954	56.9102	2.35178	16.8196	84.9203	57.8665	1.35954	344.042
1-33	1028.98	7344	3.88013	21.3962	3.90762	0.0578917	4.09965	0.00898365	1.24	0.302465	57.6537	0.711719	57.1437	2.27799	35.7956	93.5609	57.6537	0.711719	161.064
1-34	411.854	3370	3.10641	22.0217	10.6328	0.0552072	11.2098	0.00881749	3.55	0.316688	56.592	2.00022	54.5638	5.95511	-33.5916	258.532	56.592	2.00022	-168.471
1-35	1179.42	6516	14.3654	21.9131	5.194	0.0603391	5.65248	0.00958961	2.23	0.394517	61.5241	1.36546	59.49	3.26606	-21.6146	125.763	61.5241	1.36546	-284.641
1-36	821.7	3404	3.84723	22.4348	9.67007	0.0349884	9.76663	0.00569304	1.37	0.140273	36.5957	0.49994	34.9193	3.35247	-78.8736	237.075	36.5957	0.49994	-46.3979
1-37	237.236	2492	4.07904	22.4725	11.5975	0.0964145	11.6544	0.0157142	1.15	0.0986753	100.512	1.14693	93.4612	10.4064	-82.9858	284.822	100.512	1.14693	-121.12
1-38	173.179	11768	1.67869	11.8013	3.32545	1.92055	3.61988	0.164382	1.43	0.395042	981.082	13.0141	1088.26	24.175	1309.5	64.5397	1309.5	64.5397	74.9206
1-39	1221.35	9618	3.75909	21.2089	6.09461	0.0625224	6.24669	0.00961728	1.37	0.219316	61.7008	0.841268	61.5787	3.73233	56.8545	145.451	61.7008	0.841268	108.524
1-40	206.807	2752	4.63024	22.7168	8.85898	0.0943781	8.98507	0.0155495	1.5	0.166944	99.4672	1.48056	91.5736	7.86799	-109.532	218.432	99.4672	1.48056	-90.8112
1-41	640.468	5678	4.00585	21.0396	5.05476	0.0666524	5.43237	0.0101707	1.99	0.366322	65.2337	1.2916	65.5177	3.44678	75.8821	120.161	65.2337	1.2916	85.9671
1-42	518.913	3108	4.40549	22.7708	8.92967	0.0526864	9.32317	0.00870114	2.68	0.287456	55.8485	1.49028	52.1352	4.73801	-115.388	220.427	55.8485	1.49028	-48.4005
1-43	1780.74	14276	20.2417	21.2537	2.21752	0.0619444	2.96619	0.00954849	1.97	0.664151	61.2615	1.20114	61.0261	1.75683	51.824	52.913	61.2615	1.20114	118.211
1-44	711.312	1880	2.5806	19.6656	6.82414	0.0647928	6.85316	0.00924128	0.63	0.0919284	59.2995	0.371874	63.746	4.23434	234.072	157.654	59.2995	0.371874	25.3339
1-45	348.022	2814	2.08717	22.5582	15.0635	0.067318	15.0941	0.0110137	0.96	0.0636012	70.611	0.674167	66.1512	9.66689	-92.3201	371.317	70.611	0.674167	-76.485
1-46	207.548	3094	4.43115	22.3056	7.89691	0.0991309	8.20033	0.0160369	2.21	0.269501	102.56	2.24865	95.9738	7.5098	-64.7586	192.949	102.56	2.24865	-158.373
1-47	411.95	2278	3.34813	21.7496	21.9311	0.037406	22.0708	0.00590053	2.48	0.112365	37.9255	0.937791	37.2883	8.08073	-3.51762	534.437	37.9255	0.937791	-1078.16
1-48	84.0393	816	2.13226	20.8846	16.3425	0.141343	17.4897	0.0214092	6.23	0.35621	136.556	8.41795	134.24	21.9958	93.4303	389.273	136.556	8.41795	146.158
1-49	145.788	1134	3.44481	27.9689	51.9933	0.0410531	52.0764	0.00832759	2.94	0.0564555	53.4608	1.56525	40.8517	20.8547	-649.694	1517.16	53.4608	1.56525	-8.22861
1-50	381.285	7382	3.55769	20.0635	2.81408	0.20673	3.32444	0.0300821	1.77	0.53242	191.062	3.33218	190.805	5.78291	187.594	65.5249	191.062	3.33218	101.849
1-51	381.779	3992	3.75312	20.6738	7.17315	0.0945582	7.90001	0.0141781	3.31	0.418987	90.756	2.98298	91.7407	6.92987	117.452	169.306	90.756	2.98298	77.271
1-52	467.977	4332	3.73492	20.5875	2.79484	0.103376	3.144	0.0154355	1.44	0.458015	98.7438	1.41108	99.888	2.99096	127.306	65.8114	98.7438	1.41108	77.564
1-53	749.149	2116	4.3664	21.6805	13.4593	0.0341418	13.9145	0.00536852	3.53	0.253692	34.5151	1.21513	34.0884	4.66452	4.1508	325.406	34.5151	1.21513	831.53
1-54	2040.29	7324	4.51043	20.2567	4.84803	0.0698278	5.25975	0.0102588	2.04	0.387851	65.7955	1.3354	68.536	3.48587	165.243	113.359	65.7955	1.3354	39.8174
1-55	370.709	6514	5.09918	18.9707	26.3838	0.107787	26.4259	0.0148302	1.49	0.0563841	94.8998	1.40365	103.939	26.1135	316.441	609.41	94.8998	1.40365	29.9897
1-56	203.479	1654	6.06662	18.5731	14.2869	0.0787854	14.9462	0.0106128	4.39	0.29372	68.0537	2.97184	77.0024	11.0838	364.4	323.591	68.0537	2.97184	18.6756
1-57	788.232	5448	5.48397	20.5064	5.66429	0.0608847	5.76262	0.00905519	1.06	0.183944	58.1108	0.613206	60.0124	3.35809	136.533	133.168	58.1108	0.613206	42.5617
1-58	787.803	1420	3.33338	19.7712	6.15778	0.0389217	6.48063	0.00558116	2.02	0.311698	35.8784	0.722731	38.7707	2.46523	221.692	142.552	35.8784	0.722731	16.1839
1-59	354.142	828	2.85341	18.3749	25.2777	0.0416385	25.3786	0.00554904	2.26	0.0890515	35.6725	0.803973	41.4225	10.3012	388.537	575.758	35.6725	0.803973	9.18125
1-60	167.542	1368	2.97159	19.7995	12.4926	0.0623952	12.9763	0.00895992	3.51	0.270493	57.5021	2.00935	61.457	7.73844	218.359	290.095	57.5021	2.00935	26.3338
1-61	672.314	24734	1.88365	16.6493	1.48106	0.827117	3.11467	0.0998759	2.74	0.879709	613.682	16.0393	612.011	14.3176	605.815	32.0532	613.682	16.0393	101.299
1-62	756.021	6228	3.34599	21.5645	5.903	0.0592609	5.93759	0.00926843	0.64	0.107788	59.4729	0.378876	58.457	3.37293	17.0096	141.923	59.4729	0.378876	349.644
1-63	1174.65	6602	2.20614	20.4628	3.67378	0.0994027	3.91053	0.0147524	1.34	0.342664	94.4054	1.25581	96.2249	3.59012	141.555	86.2597	94.4054	1.25581	66.6915
1-64	1063.86	4470	1.68779	22.4793	9.22697	0.0334569	10.0408	0.00545466	3.96	0.394389	35.0675	1.3849	33.4156	3.30062	-83.7332	226.396	35.0675	1.3849	-41.88
1-65	83.234	1258	2.54587	23.7984	19.2819	0.13286	19.8417	0.0229319	4.68	0.235867	146.159	6.76328	126.664	23.6322	-225.341	489.293	146.159	6.76328	-64.8614
1-66	628.872	5098	3.07022	21.7953	17.7219	0.0683345	17.885	0.0108019	2.41	0.13475	69.2602	1.66024	67.1177	11.6164	-8.58093	430.709	69.2602	1.66024	-807.141
1-67	208.225	1096	2.93134	18.2841	29.0833	0.0530832	29.5551	0.0070393	5.26	0.177973	45.2193	2.37021	52.5179	15.1283	399.644	664.421	45.2193	2.37021	11.3149
1-68	2092.09	6536	2.97356	21.6678	4.92152	0.0351038	5.15684	0.00551656	1.54	0.298633	35.4643	0.54465	35.0325	1.77576	5.54556	118.542	35.4643	0.54465	639.508
1-69	439.223	3250	5.00873	23.1684	10.7613	0.0587412	10.8947	0.00987047	1.7	0.156039	63.3171	1.07112	57.9587	6.13769	-158.224	268.05	63.3171	1.07112	-40.0173
1-70	529.511	3604	6.64367	22.8937	10.2253	0.0548526	10.5241	0.00910777	2.49	0.2366	58.4467	1.44875	54.2225	5.55679	-128.667	253.182	58.4467	1.44875	-45.4249
1-71	1324.54	7110	7.35571	20.0363	6.08958	0.0555693	6.41903	0.00807516	2.03	0.316247	51.8467	1.04827	54.9122	3.43122	190.801	141.78	51.8467	1.04827	27.1732
1-72	1529.26	23908	9.66904	20.434	2.57316	0.107162	2.72934	0.0158815	0.91	0.333414	101.575	0.917084	103.366	2.68236	144.839	60.3766	101.575	0.917084	70.1294
1-73	1137.86	8348	7.38145	20.9228	3.92711	0.0588767	4.26744	0.00893432	1.67	0.391335	57.3386	0.953309	58.0887	2.40933	89.1481	93.0919	57.3386	0.953309	64.3183
1-74	1107.33	7638	3.26652	21.414	6.17842	0.0559541	6.36504	0.00869016	1.53	0.240375	55.7784	0.849727	55.2822	3.42468	33.83	148.072	55.7784	0.849727	164.879
1-75	905.159	5742	20.9272	20.6531	6.95217	0.0589553	8.54016	0.00883093	4.96	0.580786	56.6779	2.7989	58.164	4.82774	119.778	163.995	56.6779	2.7989	47.3191
1-76	935.395	10086	6.89375	20.9206	4.55999	0.059665	4.59425	0.00905301	0.56	0.121892	58.0969	0.323881	58.8443	2.62662	89.3914	108.12	58.0969	0.323881	64.9916
1-77	204.488	1652	4.38432	24.9302	15.6543	0.0429054	16.9044	0.00775776	6.38	0.377416	49.8168	3.16606	42.6567	7.06162	-343.721	405.636	49.8168	3.16606	-14.4934
1-78	523.852	3946	3.70057	23.1814	10.7367	0.0536907	10.8127	0.00902687	1.28	0.118379	57.9299	0.738181	53.1035	5.59444	-159.614	267.528	57.9299	0.738181	-36.2938
1-79	353.659	4172	4.25636	21.9438	6.1353	0.0898801	6.44077	0.0143045	1.96	0.304311	91.5597	1.78189	87.3917	5.39333	-25.0042	148.711	91.5597	1.78189	-366.177
1-80	301.874	4538	3.8296	22.9129	8.63525	0.0588968	8.68099	0.00978749	0.89	0.102523	62.7875	0.556096	58.108	4.90276	-130.743	213.777	62.7875	0.556096	-48.0238
1-81	458.882	4336	7.58443	20.341	10.9768	0.0605373	11.2447	0.0089309	2.44	0.216991	57.3167	1.39233	59.6798	6.51751	155.557	257.639	57.3167	1.39233	36.8462
1-82	170.988	3460	3.89225	20.4973	9.58996	0.196438	10.1682	0.0292027	3.38	0.33241	185.556	6.1824	182.108	16.9531	137.605	225.693	185.556	6.1824	134.847
1-83	331.776	20176	4.93964	16.9422	1.84884	0.735588	1.93471	0.0903865	0.57	0.294618	557.823	3.04591	559.828	8.32613	568.007	40.2278	557.823	3.04591	98.2069
1-84	480.099	6146	6.6686	21.291	2.85482	0.0969379	3.07774	0.0149689	1.15	0.373651	95.7803	1.09333	93.9458	2.76169	47.6036	68.1945	95.7803	1.09333	201.204
1-85	396.682	6422	6.8305	20.5111	7.25717	0.0908734	8.83562	0.0135184	5.04	0.570418	86.5613	4.33353	88.3167	7.47373	135.996	170.692	86.5613	4.33353	63.6499
1-86	492.017	3444	6.76779	22.7864	8.27922	0.0559684	8.6991	0.0092495	2.67	0.306928	59.3521	1.57743	55.296	4.68166	-117.076	204.382	59.3521	1.57743	-50.6953
1-87	671.144	7284	11.495	22.6253	8.72998	0.0583451	8.96289	0.00957411	2.03	0.226489	61.4251	1.24101	57.5788	5.01717	-99.6124	214.812	61.4251	1.24101	-61.6641
1-88	353.895	2984	3.09655	22.2123	9.41701	0.0605712	10.1888	0.00975796	3.89	0.381791	62.5989	2.42331	59.7122	5.9086	-54.5481	229.77	62.5989	2.42331	-114.759
1-89	343.823	7800	1.76035	20.5384	2.95202	0.197292	3.13995	0.0293884	1.07	0.340769	186.719	1.96924	182.832	5.25372	132.914	69.3945	186.719	1.96924	140.481
1-90	309.175	3996	5.48366	21.6246	11.5824	0.0922549	11.7373	0.0144689	1.9	0.161878	92.6044	1.74691	89.6017	10.0664	10.3478	279.406	92.6044	1.74691	894.92
1-91	573.028	4322	8.45686	22.3935	5.88676	0.0557081	6.15289	0.0090477	1.79	0.29092	58.0629	1.03466	55.0456	3.29674	-74.3659	144.026	58.0629	1.03466	-78.0774
1-92	510.184	3446	9.29554	21.2089	11.5463	0.0585139	11.6075	0.00900068	1.19	0.10252	57.7626	0.684304	57.7407	6.51532	56.8548	276.108	57.7626	0.684304	101.597
1-93	264.777	3580	4.40296	21.063	14.0241	0.101926	14.088	0.0155706	1.34	0.0951165	99.6011	1.3244	98.5527	13.2323	73.2438	334.779	99.6011	1.3244	135.986
1-94	1592.69	5070	3.97131	18.8182	20.1288	0.0682654	20.5147	0.00931703	3.96	0.193032	59.7834	2.35648	67.052	13.3119	334.757	460.355	59.7834	2.35648	17.8587
1-95	489.891	1480	1.94876	24.7521	14.0934	0.0303552	14.3277	0.00544935	2.58	0.180071	35.0334	0.90141	30.3637	4.28602	-325.267	363.504	35.0334	0.90141	-10.7707
1-96	133.333	1344	2.52817	23.879	17.3343	0.0632143	17.8524	0.0109479	4.27	0.239183	70.1909	2.9809	62.2396	10.778	-233.853	439.937	70.1909	2.9809	-30.015
1-97	862.415	2594	2.78403	20.6204	12.5672	0.035765	13.5702	0.00534877	5.12	0.377298	34.3885	1.756	35.6809	4.7579	123.502	296.959	34.3885	1.756	27.8444
1-98	927.514	5336	3.05886	20.6149	10.0321	0.0689445	10.0639	0.0103081	0.8	0.0794918	66.1102	0.526179	67.6973	6.59095	124.127	236.731	66.1102	0.526179	53.2601
1-99	1384.56	8282	7.35352	21.4251	4.5861	0.0559356	4.71155	0.00869181	1.08	0.229224	55.7889	0.599921	55.2645	2.53423	32.5706	109.91	55.7889	0.599921	171.286
1-100	1137.19	6414	2.81709	21.9949	5.30964	0.0617831	5.40485	0.00985576	1.01	0.186869	63.2233	0.635434	60.8719	3.19337	-30.6385	128.806	63.2233	0.635434	-206.352
1-101	138.917	1918	4.00682	24.012	22.4403	0.0856491	24.1445	0.0149159	8.91	0.369028	95.4441	8.44143	83.4422	19.3435	-247.886	573.569	95.4441	8.44143	-38.5032
1-102	1238.21	7862	8.84393	20.978	2.73002	0.0598022	2.82337	0.0090987	0.72	0.255015	58.3887	0.418501	58.9757	1.61767	82.8519	64.7823	58.3887	0.418501	70.4737
1-103	1059.79	19818	17.2586	19.0146	1.8253	0.173507	2.03072	0.0239277	0.89	0.438268	152.432	1.34073	162.458	3.04868	311.223	41.57	152.432	1.34073	48.9782
1-104	542.148	3064	2.88893	22.946	15.3898	0.0363611	16.0569	0.00605123	4.58	0.285236	38.8912	1.77585	36.2651	5.72034	-134.311	382.554	38.8912	1.77585	-28.9561
1-105	910.678	3792	3.02333	21.9142	10.3951	0.0329131	10.6641	0.00523111	2.38	0.22318	33.634	0.798404	32.8812	3.45032	-21.7378	252.177	33.634	0.798404	-154.726
1-106	480.636	3400	5.24297	22.468	7.17641	0.0499911	7.52086	0.00814621	2.25	0.299168	52.3011	1.17201	49.5321	3.63585	-82.4961	175.908	52.3011	1.17201	-63.3983
1-107	385.773	8198	1.78055	20.7547	5.43439	0.133097	5.71848	0.0200347	1.78	0.311272	127.876	2.25376	126.877	6.82053	108.214	128.418	127.876	2.25376	118.17
1 - Susitna River (Parks Highway)
							Isotope ratios						Apparent ages (Ma)
Analysis	U	206Pb	U/Th	206Pb*	±	207Pb*	±	206Pb*	±	error	206Pb*	±	207Pb*	±	206Pb*	±	Best age	±	Conc
	(ppm)	204Pb		207Pb*	(%)	235U*	(%)	238U	(%)	corr.	238U*	(Ma)	235U	(Ma)	207Pb*	(Ma)	(Ma)	(Ma)	(%)
1-108	231.507	42623.6	2.88425	17.6038	2.21672	0.58112	4.75092	0.0741945	4.20207	0.884475	461.377	18.7099	465.181	17.7318	484.026	48.9722	461.377	18.7099	NA
1-109	289.117	37872.5	6.18323	8.87214	1.7794	1.04433	5.36271	0.0671995	5.0589	0.943347	419.261	20.5351	726.072	27.8234	1843.59	32.2033	419.261	20.5351	NA
1-110	940.305	23177.5	15.1722	20.3314	9.80106	0.0618614	10.5974	0.0091219	4.03051	0.380328	58.537	2.34866	60.9468	6.26886	156.67	229.873	58.537	2.34866	NA
1-111	622.598	47924.9	2.52803	20.4441	4.30324	0.108072	4.53567	0.0160243	1.43334	0.316015	102.48	1.45727	104.2	4.49178	143.719	101.008	102.48	1.45727	NA
1-112	105.146	9002.74	2.61313	18.2989	9.85189	0.368035	10.0835	0.0488442	2.14857	0.213079	307.422	6.45016	318.196	27.551	397.829	221.3	307.422	6.45016	NA
1-113	399.912	13599.1	2.73481	23.1846	14.069	0.0518574	14.3898	0.00871987	3.02166	0.209986	55.9682	1.68385	51.3353	7.20353	-159.965	351.163	55.9682	1.68385	NA
1-114	480.674	10632.6	5.4094	18.5975	14.08	0.064485	14.6195	0.00869785	3.93502	0.269162	55.8275	2.18734	63.4524	8.99275	361.436	319.02	55.8275	2.18734	NA
1-115	364.522	8918.37	8.79917	21.1893	12.6012	0.0944102	13.034	0.0145089	3.33073	0.255543	92.8585	3.0707	91.6034	11.4173	59.0548	301.366	92.8585	3.0707	NA
1-116	347.365	21423.7	4.46001	20.7734	9.39727	0.0977478	9.62002	0.014727	2.05816	0.213945	94.2438	1.92558	94.6953	8.69803	106.06	222.458	94.2438	1.92558	NA
1-117	175.332	238036	3.67574	6.37347	0.810787	9.25773	1.48987	0.427936	1.24993	0.838955	2296.41	24.1477	2363.84	13.6539	2422.52	13.7543	2422.52	13.7543	94.7943
1-118	478.291	32581.5	2.43892	20.1568	4.91937	0.102005	5.51514	0.0149122	2.49329	0.452082	95.4203	2.36159	98.6253	5.18355	176.791	114.782	95.4203	2.36159	NA
1-119	45.3774	46732.4	1.56688	8.57298	2.03724	5.55038	2.35644	0.345107	1.18425	0.502558	1911.19	19.5866	1908.44	20.2768	1905.43	36.598	1905.43	36.598	100.302
1-120	650.641	20930	2.19836	21.0907	10.7318	0.061942	10.9884	0.00947489	2.36049	0.214817	60.7915	1.42823	61.0238	6.5081	70.1391	255.9	60.7915	1.42823	NA
1-121	463.873	16859.1	4.16655	22.5411	5.61551	0.055195	7.15553	0.00902349	4.43483	0.619776	57.9083	2.55663	54.5521	3.80051	-90.4616	137.792	57.9083	2.55663	NA
1-122	614.075	22670.8	5.20236	20.2189	12.3372	0.0585369	12.513	0.00858395	2.08972	0.167004	55.0995	1.14652	57.7628	7.0262	169.604	289.023	55.0995	1.14652	NA
1-123	711.058	28582.9	4.05875	19.8326	5.6451	0.0991402	5.85524	0.0142603	1.55456	0.265498	91.2784	1.40897	95.9824	5.3626	214.518	130.821	91.2784	1.40897	NA
1-124	293.228	33917.5	2.38168	19.6471	7.10556	0.206501	7.20845	0.0294252	1.21358	0.168356	186.95	2.23621	190.613	12.5282	236.218	164.104	186.95	2.23621	NA
1-125	1213.36	258937	6.31751	16.6085	0.635649	0.811724	2.4971	0.0977769	2.41484	0.967058	601.368	13.8653	603.42	11.3606	611.119	13.7191	601.368	13.8653	98.4043
1-126	95.1157	120.532	0.405384	8.35272	14.6667	0.150415	18.4661	0.00911209	11.2198	0.607589	58.4743	6.53103	142.278	24.5203	1952.05	263.492	58.4743	6.53103	NA
1-127	3378.37	79292.2	20.5354	21.156	1.28591	0.0647507	3.4651	0.00993519	3.21766	0.928591	63.7303	2.04052	63.7059	2.13965	62.7893	30.645	63.7303	2.04052	NA
1-128	355.453	140127	1.91147	12.4286	0.996456	2.28745	4.36451	0.206192	4.24924	0.973589	1208.5	46.8265	1208.42	30.8455	1208.3	19.6029	1208.3	19.6029	100.016
1-129	281.514	6556.53	4.65494	29.4946	30.5975	0.0411123	30.8343	0.00879453	3.81426	0.123702	56.4454	2.14357	40.9095	12.364	-797.933	884.166	56.4454	2.14357	NA
1-130	628.149	22172.6	7.10719	21.1503	10.9954	0.0620986	12.4613	0.00952568	5.86387	0.470566	61.1159	3.56682	61.1735	7.39808	63.454	262.551	61.1159	3.56682	NA
1-131	515.894	25919.7	4.63844	21.5516	12.9102	0.0544958	13.1745	0.00851805	2.62584	0.199312	54.6783	1.42969	53.879	6.91336	18.4979	311.196	54.6783	1.42969	NA
1-132	1044.25	51233.3	4.82267	21.1774	7.36555	0.0564618	9.02603	0.00867214	5.21708	0.578004	55.6632	2.89149	55.7703	4.89814	60.3782	175.728	55.6632	2.89149	NA
1-133	565.416	17447.5	3.26352	20.7768	8.12103	0.0999125	8.62198	0.0150556	2.8961	0.335897	96.331	2.7691	96.6955	7.95257	105.674	192.151	96.331	2.7691	NA
1-134	425.58	11169.1	5.37586	23.1431	9.1489	0.0882033	9.72625	0.0148049	3.30113	0.339404	94.7388	3.10458	85.8283	8.00496	-155.507	227.61	94.7388	3.10458	NA
1-135	397.3	10055.9	2.22283	17.2701	22.4407	0.123819	25.4685	0.0155089	12.0441	0.472901	99.2094	11.8574	118.528	28.4995	526.132	497.68	99.2094	11.8574	NA
1-136	509.524	12717.6	11.5976	22.133	14.9682	0.0574853	15.822	0.00922777	5.12734	0.324064	59.2132	3.02217	56.7536	8.73342	-45.8443	365.686	59.2132	3.02217	NA
1-137	155.132	2467.24	4.79793	23.0176	52.7756	0.0515312	53.7883	0.00860258	10.3883	0.193133	55.2186	5.7118	51.0204	26.7712	-142.016	1396.86	55.2186	5.7118	NA
1-138	809.223	32157.6	2.24067	20.7517	6.02344	0.0579494	6.46471	0.00872169	2.34748	0.363123	55.9799	1.30843	57.1991	3.59555	108.562	142.361	55.9799	1.30843	NA
1-139	64.2325	252768	0.986295	5.15247	0.547499	14.5968	3.63529	0.54547	3.59382	0.988594	2806.31	81.7728	2789.32	34.5588	2777.05	8.97326	2777.05	8.97326	101.053
1-140	609.535	26606.8	2.84857	18.5765	9.76352	0.0674192	10.6718	0.00908335	4.30824	0.403703	58.2907	2.49998	66.2475	6.8442	363.985	220.612	58.2907	2.49998	NA
1-141	282.157	14821.3	1.93288	20.5632	4.81031	0.204948	5.19793	0.0305656	1.96962	0.378924	194.087	3.76582	189.305	8.97734	130.055	113.2	194.087	3.76582	NA
1-142	232.508	46992	0.717101	19.177	6.29198	0.34186	6.70299	0.0475475	2.31106	0.34478	299.447	6.76211	298.58	17.3413	291.832	143.81	299.447	6.76211	NA
1-143	1131.69	47576.6	2.84012	21.7372	2.73499	0.0951278	3.00015	0.0149972	1.23318	0.411039	95.9603	1.1746	92.2689	2.64616	-2.14703	65.9487	95.9603	1.1746	NA
1-144	2236.35	55485.2	8.56239	21.0688	2.33545	0.0578549	3.3314	0.00884057	2.3757	0.713122	56.7395	1.34204	57.1084	1.85	72.5873	55.5583	56.7395	1.34204	NA
1-145	919.613	13759.3	1.95045	21.7841	8.09292	0.0565376	8.20356	0.00893256	1.34276	0.16368	57.3273	0.766356	55.8432	4.45746	-7.3456	195.616	57.3273	0.766356	NA
1-146	441.608	9448.12	5.08715	22.6137	13.1007	0.0548189	13.7306	0.00899087	4.11108	0.299409	57.6999	2.36151	54.1901	7.24571	-98.3552	322.951	57.6999	2.36151	NA
1-147	626.994	56976.4	6.77691	17.3547	4.19283	0.201848	12.3506	0.0254062	11.6171	0.940612	161.733	18.555	186.689	21.0647	515.373	92.1237	161.733	18.555	NA
1-148	294.183	12573.1	4.51747	22.4149	18.0087	0.0946894	18.0697	0.0153935	1.48279	0.0820598	98.477	1.44911	91.8624	15.8718	-76.7113	443.503	98.477	1.44911	NA
1-149	277.961	9811.61	2.06196	21.5298	15.1431	0.0977337	16.0624	0.015261	5.35604	0.333451	97.6357	5.19	94.6822	14.5217	20.8731	365.321	97.6357	5.19	NA
1-150	376.499	4255.64	3.10024	22.0796	14.2564	0.0517958	15.2095	0.00829438	5.29948	0.348431	53.2485	2.81027	51.2758	7.60532	-39.9639	347.753	53.2485	2.81027	NA
1-151	1231.25	29437.4	2.15808	20.6114	3.97731	0.0581155	4.58616	0.00868755	2.2834	0.497889	55.7617	1.26777	57.3585	2.55764	124.527	93.6899	55.7617	1.26777	NA
1-152	673.141	33337.6	2.6793	20.4672	7.53769	0.099441	7.83094	0.0147612	2.12295	0.271098	94.4616	1.99075	96.2602	7.19191	141.06	177.164	94.4616	1.99075	NA
1-153	267.969	1395.8	4.17254	11.0459	59.8858	0.122201	60.3058	0.00978985	7.10444	0.117807	62.8025	4.44011	117.066	66.7757	1436.74	1272.42	62.8025	4.44011	4.37119
1-154	325.251	9172.25	3.19989	22.892	15.2839	0.0885233	15.5015	0.0146974	2.58789	0.166945	94.0561	2.4164	86.1269	12.801	-128.485	379.449	94.0561	2.4164	NA
1-155	244.276	4304.07	4.00057	22.0682	32.4553	0.0543438	32.7611	0.00869791	4.4653	0.136299	55.8279	2.48212	53.7326	17.1473	-38.7109	806.486	55.8279	2.48212	NA
1-156	163.528	8269.18	3.05984	20.7216	19.7507	0.12571	19.9923	0.0188925	3.09902	0.155011	120.653	3.70429	120.235	22.6729	111.988	470.084	120.653	3.70429	NA
1-157	173.41	2601.56	3.05459	19.2312	24.953	0.0682795	25.3391	0.0095235	4.40642	0.173898	61.1019	2.67969	67.0655	16.4462	285.334	578.548	61.1019	2.67969	NA
1-158	668.1	18817.8	2.19804	18.8863	9.18056	0.120355	10.7437	0.0164857	5.58066	0.519437	105.407	5.83459	115.394	11.7195	326.614	208.77	105.407	5.83459	NA
1-159	1099.18	28419.4	3.06735	21.036	8.78442	0.0530511	13.2878	0.00809386	9.96994	0.750307	51.9663	5.16019	52.4869	6.79727	76.2961	209.036	51.9663	5.16019	NA
1-160	355.501	7380.07	5.22515	21.8848	11.1123	0.0935947	11.4922	0.0148557	2.93051	0.254999	95.0616	2.76535	90.8464	9.98717	-18.4914	269.484	95.0616	2.76535	NA
1-161	181.826	5531.5	3.44362	30.7354	49.5862	0.0368457	50.9186	0.00821342	11.5721	0.227267	52.7309	6.0772	36.7397	18.375	-916.313	1521.23	52.7309	6.0772	NA
1-162	3381.03	82520.3	7.61519	20.8775	1.84552	0.0619032	4.90843	0.00937326	4.54827	0.926624	60.1425	2.72273	60.9868	2.90538	94.2567	43.7067	60.1425	2.72273	NA
1-163	883.565	336889	15.2046	16.8113	1.75317	0.427661	9.54854	0.0521434	9.38622	0.983	327.668	29.9873	361.514	29.0509	584.867	38.0575	327.668	29.9873	NA
1-164	207.416	5896.01	3.18584	30.0582	61.8503	0.0398886	62.2194	0.00869584	6.76703	0.108761	55.8146	3.76069	39.7153	24.2382	-851.933	1941.06	55.8146	3.76069	NA
1-165	540.35	14292	4.83764	21.7464	5.30833	0.0933903	6.33323	0.0147295	3.45419	0.545407	94.2601	3.23224	90.6567	5.4927	-3.17035	128.107	94.2601	3.23224	NA
1-166	482.825	10358.8	2.06603	20.5888	7.02502	0.0637126	8.54248	0.00951381	4.86036	0.568963	61.0401	2.95276	62.7154	5.1954	127.155	165.5	61.0401	2.95276	NA
1-167	542.759	27279.6	3.65123	20.7201	8.83241	0.0983135	11.0915	0.0147742	6.70894	0.604872	94.5439	6.2966	95.2184	10.0814	112.152	208.805	94.5439	6.2966	NA
1-168	411.967	13418.5	4.91028	24.1025	26.8859	0.0484226	28.0629	0.00846465	8.04194	0.286569	54.337	4.35138	48.0142	13.1613	-257.412	691.749	54.337	4.35138	NA
1-169	680.583	10696.1	3.41767	21.0543	11.0477	0.0579218	11.8293	0.00884468	4.2288	0.357483	56.7658	2.38997	57.1725	6.57635	74.2234	263.266	56.7658	2.38997	NA
1-170	190.418	2353.15	4.79882	54.5615	47.0372	0.020834	48.4882	0.00824437	11.7731	0.242803	52.9287	6.20584	20.9371	10.0484	-3038.8	370.136	52.9287	6.20584	NA
1-171	418.393	9109.04	3.18985	23.9749	14.278	0.0490152	14.5058	0.00852288	2.56075	0.176532	54.7092	1.39504	48.5879	6.8822	-243.978	362.381	54.7092	1.39504	NA
1-172	813.214	21578	2.65927	21.3964	8.85064	0.0541107	9.37445	0.00839699	3.08974	0.329592	53.9045	1.65856	53.5081	4.88626	35.7737	212.236	53.9045	1.65856	NA
1-173	643.224	49488.7	3.36639	22.9395	4.53753	0.0866095	6.58753	0.0144095	4.7756	0.724945	92.2267	4.37302	84.34	5.33149	-133.611	112.27	92.2267	4.37302	NA
1-174	931.348	37551.6	10.3095	21.67	5.87618	0.0643436	6.5864	0.0101126	2.97511	0.451704	64.8626	1.92006	63.3176	4.043	5.30634	141.601	64.8626	1.92006	NA
1-175	159.288	5752.5	4.371	26.0863	69.227	0.076025	70.4246	0.0143836	12.9321	0.18363	92.0622	11.821	74.4009	50.5646	-462.018	2072.88	92.0622	11.821	NA
1-176	443.191	25723.9	5.4204	21.6768	10.1222	0.0960175	10.2599	0.0150954	1.67564	0.163319	96.584	1.60634	93.0935	9.1268	4.52442	244.296	96.584	1.60634	NA
1-177	1214.94	50035.5	2.54326	20.9593	6.63734	0.0530092	7.28516	0.00805799	3.00321	0.412237	51.737	1.54755	52.4465	3.72383	85.0108	157.585	51.737	1.54755	NA
1-178	196.227	4653.9	3.80062	22.6606	34.31	0.051049	34.6767	0.00838991	5.02934	0.145035	53.8592	2.69748	50.5546	17.103	-103.442	865.582	53.8592	2.69748	NA
1-179	343.521	10687.5	3.04833	22.5738	7.79621	0.0903592	8.16701	0.0147936	2.43293	0.297898	94.6674	2.28637	87.838	6.8723	-94.0097	191.559	94.6674	2.28637	NA
1-180	2353.81	116897	3.30344	21.0803	2.60768	0.0681286	5.54144	0.0104161	4.88954	0.882358	66.7993	3.24931	66.9221	3.58889	71.2908	62.0205	66.7993	3.24931	NA
1-181	405.791	24978.4	4.17436	13.6533	2.8614	0.209034	4.47536	0.0206992	3.44111	0.768901	132.073	4.49855	192.742	7.85678	1020.64	57.9256	132.073	4.49855	12.9402
1-182	379.567	6745.63	5.57145	25.2609	40.0624	0.0487758	40.8486	0.00893619	7.97567	0.195249	57.3505	4.5538	48.3562	19.2922	-377.816	1076.91	57.3505	4.5538	NA
1-183	535.502	9553.21	4.91419	24.4039	14.4258	0.0558865	15.4764	0.00989156	5.60499	0.362164	63.4518	3.53902	55.2172	8.31762	-289.007	369.464	63.4518	3.53902	NA
1-184	157.198	4885.33	3.56047	51.9917	78.7459	0.0234677	79.5185	0.00884919	11.0581	0.139063	56.7946	6.25283	23.5534	18.5158	-2810.88	717.986	56.7946	6.25283	NA
1-185	109.288	8945.48	2.40462	21.9075	20.063	0.195122	20.3378	0.0310026	3.33201	0.163833	196.82	6.45896	180.991	33.7278	-20.9945	489.716	196.82	6.45896	NA
1-186	1131.57	18097.9	5.81556	22.7173	6.04946	0.053887	7.51489	0.00887851	4.45843	0.593279	56.982	2.52931	53.2926	3.90161	-109.595	149.018	56.982	2.52931	NA
1-187	264.999	322927	1.50843	8.94364	0.731026	4.85045	4.18971	0.314626	4.12544	0.98466	1763.43	63.6496	1793.69	35.2843	1829.05	13.2522	1829.05	13.2522	96.4126
1-188	92.2818	22447.7	1.44241	16.8886	5.69211	0.685609	5.94243	0.0839785	1.70656	0.287183	519.827	8.52291	530.159	24.547	574.888	123.851	519.827	8.52291	90.4223
1-189	252.531	4793.88	2.81597	23.7451	15.0621	0.065087	15.6734	0.011209	4.33436	0.276543	71.8558	3.0972	64.0264	9.72556	-219.692	380.617	71.8558	3.0972	NA
1-190	558.708	31769.8	6.24134	21.5208	16.0399	0.0553247	16.163	0.00863528	1.99116	0.123192	55.4276	1.09892	54.6769	8.60393	21.9173	387.116	55.4276	1.09892	NA
1-191	350.951	9945.29	5.37033	20.3473	13.8295	0.0592716	14.4073	0.00874684	4.03934	0.280367	56.1406	2.25786	58.4673	8.18581	154.856	325.143	56.1406	2.25786	NA
1-192	394.591	16146.5	3.60941	22.0013	17.2668	0.0920232	17.4035	0.014684	2.17637	0.125054	93.9709	2.03032	89.3864	14.8923	-31.3485	421.325	93.9709	2.03032	NA
1-193	456.964	11438.3	8.66603	23.3347	16.611	0.0513562	17.2119	0.0086915	4.50836	0.261932	55.7869	2.50423	50.8514	8.53715	-176.032	416.607	55.7869	2.50423	NA
1-194	676.273	86380.8	6.61637	20.4439	3.86004	0.0580494	5.36815	0.00860716	3.73056	0.694944	55.2479	2.05225	57.2951	2.99053	143.731	90.6195	55.2479	2.05225	NA
1-195	1147.63	11395	14.0999	19.7999	13.9406	0.0644555	14.0159	0.00925598	1.4506	0.103497	59.3934	0.857605	63.4242	8.61772	218.317	324.018	59.3934	0.857605	NA
1-196	183.008	439.01	3.36757	8.86845	50.183	0.176865	52.0396	0.011376	13.7763	0.264727	72.9203	9.98911	165.36	79.5733	1844.34	977.845	72.9203	9.98911	NA
1-197	137.094	108159	2.21235	12.9137	1.84391	2.13749	2.18379	0.200196	1.17001	0.535772	1176.37	12.5809	1161.01	15.1076	1132.49	36.7056	1132.49	36.7056	103.875
1-198	614.346	32108.4	4.33378	21.0862	4.92454	0.101192	5.91005	0.0154754	3.26766	0.552899	98.997	3.21017	97.876	5.51453	70.629	117.167	98.997	3.21017	NA
1-199	479.953	17147.9	4.07025	21.6641	6.95089	0.0915512	7.0118	0.0143848	0.922186	0.131519	92.0695	0.843017	88.9474	5.97151	5.92919	167.504	92.0695	0.843017	NA
1 - Susitna River (Denali Highway)
							Isotope ratios						Apparent ages (Ma)
Analysis	U	206Pb	U/Th	206Pb*	±	207Pb*	±	206Pb*	±	error	206Pb*	±	207Pb*	±	206Pb*	±	Best age	±	Conc
	(ppm)	204Pb		207Pb*	(%)	235U*	(%)	238U	(%)	corr.	238U*	(Ma)	235U	(Ma)	207Pb*	(Ma)	(Ma)	(Ma)	(%)
1-200	485.611	1801.06	3.34668	17.6395	24.6279	0.0425691	28.2497	0.00544603	13.8387	0.489872	35.0121	4.8321	42.3292	11.7126	479.505	551.839	35.0121	4.8321	NA
1-201	1153.42	24596.3	6.93825	20.4041	4.71758	0.0710973	5.42011	0.0105213	2.66872	0.492373	67.4702	1.7912	69.7402	3.65312	148.303	110.651	67.4702	1.7912	NA
1-202	226.23	6922.36	2.49085	22.9605	22.2914	0.0814851	22.5276	0.0135693	3.2536	0.144427	86.8852	2.80793	79.5402	17.2363	-135.867	557.357	86.8852	2.80793	NA
1-203	306.391	5033.79	2.93478	19.5873	21.1002	0.0662071	21.3728	0.00940542	3.40288	0.159215	60.3479	2.04399	65.0938	13.4766	243.268	490.928	60.3479	2.04399	NA
1-204	2849.17	79278.8	6.34619	21.0892	2.61077	0.0677697	4.17801	0.0103656	3.26185	0.780718	66.477	2.15724	66.5808	2.69252	70.3129	62.1097	66.477	2.15724	NA
1-205	178.772	8562.54	2.60398	12.1474	3.42389	2.25604	4.95027	0.19876	3.57521	0.722226	1168.66	38.2139	1198.67	34.8406	1253.17	66.9832	1253.17	66.9832	93.2559
1-206	1068.49	140624	7.47841	18.194	0.866412	0.433099	7.5756	0.0571497	7.52589	0.993438	358.268	26.2275	365.374	23.2506	410.701	19.3769	358.268	26.2275	NA
1-207	904.816	17017.3	1.55402	22.6141	8.10177	0.0324414	8.33971	0.00532081	1.97787	0.237163	34.2092	0.674823	32.4174	2.66082	-98.3934	199.256	34.2092	0.674823	NA
1-208	1132.37	23164.5	3.9197	22.0916	6.64799	0.0631986	7.11675	0.0101259	2.54014	0.356924	64.9474	1.64147	62.2246	4.29543	-41.2903	161.639	64.9474	1.64147	NA
1-209	846.858	279504	6.23523	13.8901	0.418397	1.40536	2.44262	0.141577	2.40652	0.985221	853.576	19.2397	891.202	14.4918	985.756	8.52022	985.756	8.52022	86.591
1-210	269.35	5800.48	3.5133	26.3241	23.2742	0.0471238	24.0762	0.00899692	6.16237	0.255953	57.7385	3.54217	46.7556	11.0021	-486.049	624.648	57.7385	3.54217	NA
1-211	560.852	3031.31	3.33228	19.8531	8.70233	0.0960045	12.6309	0.0138235	9.15477	0.72479	88.5019	8.04678	93.0814	11.2347	212.076	201.97	88.5019	8.04678	NA
1-212	1681.47	37123.2	3.52335	21.4406	4.86902	0.0576172	5.45822	0.00895957	2.46673	0.45193	57.4999	1.41206	56.8802	3.01929	30.8385	116.738	57.4999	1.41206	NA
1-213	512.647	2697.04	3.68382	18.6715	17.3649	0.10974	18.8205	0.0148609	7.25751	0.385618	95.0944	6.85084	105.728	18.8997	352.471	394.957	95.0944	6.85084	NA
1-214	488.706	9854.44	2.86362	21.1991	11.3759	0.0606365	15.2919	0.00932289	10.2192	0.668276	59.8208	6.08494	59.7748	8.87709	57.9123	271.945	59.8208	6.08494	NA
1-215	353.584	8406.92	3.52727	22.1142	11.6081	0.0936664	12.604	0.0150229	4.91054	0.389601	96.1234	4.68516	90.913	10.9611	-43.7694	282.941	96.1234	4.68516	NA
1-216	308.449	8377.29	5.02393	17.1859	27.1512	0.119373	28.0346	0.0148792	6.98193	0.249047	95.2109	6.59871	114.504	30.3659	536.833	604.376	95.2109	6.59871	NA
1-217	481.49	21614	4.8605	22.0347	13.6437	0.0903984	13.9205	0.0144466	2.76224	0.19843	92.4628	2.53581	87.8744	11.7187	-35.0311	332.353	92.4628	2.53581	NA
1-218	408.319	7515.31	1.8038	21.4866	37.2699	0.0371217	39.3074	0.00578488	12.4909	0.317774	37.1843	4.63127	37.01	14.2867	25.7265	922.326	37.1843	4.63127	NA
1-219	611.399	40171.1	2.89687	22.5519	7.8621	0.0904463	8.18603	0.0147936	2.28002	0.278526	94.6669	2.14266	87.919	6.8944	-91.6339	193.093	94.6669	2.14266	NA
1-220	346.118	9954.37	2.34291	17.707	26.8343	0.0443994	29.3234	0.0057019	11.8229	0.403191	36.6524	4.3211	44.1102	12.6584	471.11	603.757	36.6524	4.3211	NA
1-221	300.968	8480.31	2.98512	19.526	10.2582	0.102805	12.574	0.0145588	7.27156	0.5783	93.1752	6.72656	99.3621	11.9025	250.445	236.582	93.1752	6.72656	NA
1-222	439.087	14396.9	4.74324	22.6452	10.4372	0.0893093	10.7605	0.014668	2.61783	0.243282	93.8694	2.43954	86.8597	8.95816	-101.772	257.112	93.8694	2.43954	NA
1-223	307.234	10123.5	2.64542	23.7244	9.59999	0.0869411	9.86001	0.0149596	2.24943	0.228137	95.7213	2.13728	84.6499	8.00821	-217.497	241.812	95.7213	2.13728	NA
1-224	1074.1	22295.4	3.11526	21.4762	6.09563	0.0966525	6.56566	0.0150546	2.43952	0.371557	96.3251	2.3324	93.6816	5.87567	26.8529	146.276	96.3251	2.3324	NA
1-225	691.605	30094.8	5.16245	21.4613	3.95343	0.0990384	4.98213	0.0154155	3.03183	0.60854	98.6168	2.96714	95.8883	4.55868	28.5673	94.7887	98.6168	2.96714	NA
1-226	685.344	4437.94	1.54178	22.4006	21.5238	0.0346508	22.058	0.00562952	4.82508	0.218746	36.1885	1.74123	34.588	7.50106	-75.1463	531.504	36.1885	1.74123	NA
1-227	4519.46	37345.9	14.5907	21.5547	2.7505	0.0379699	3.20702	0.00593581	1.64917	0.514236	38.1516	0.627325	37.84	1.1912	18.0995	66.0581	38.1516	0.627325	NA
1-228	3005.06	84055.3	1.68344	20.9849	3.72423	0.0578026	4.02838	0.00879735	1.53555	0.381183	56.4634	0.863237	57.0581	2.23513	82.0716	88.3954	56.4634	0.863237	NA
1-229	682.299	25048.5	2.50155	19.9587	14.9946	0.0604451	15.2502	0.00874965	2.77996	0.182291	56.1586	1.55441	59.5915	8.82648	199.798	349.904	56.1586	1.55441	NA
1-230	400.555	11068.8	4.47842	19.6307	7.94274	0.102765	8.97423	0.0146311	4.17729	0.465476	93.6351	3.88314	99.3251	8.49177	238.139	183.402	93.6351	3.88314	NA
1-231	1188.65	46313.4	1.9917	20.4314	3.57059	0.102144	3.91088	0.015136	1.59557	0.407982	96.8419	1.53363	98.7536	3.68028	145.135	83.7644	96.8419	1.53363	NA
1-232	493.591	12641.9	4.91125	21.8531	8.5736	0.092805	8.8644	0.014709	2.2519	0.254039	94.1299	2.10431	90.113	7.64393	-14.9868	207.549	94.1299	2.10431	NA
1-233	237.288	6815.08	2.89529	25.864	20.9276	0.0806093	21.3561	0.0151209	4.25678	0.199324	96.7463	4.08753	78.7176	16.1773	-439.456	555.135	96.7463	4.08753	NA
1-234	459.145	9809.24	4.82672	26.0064	29.973	0.0448354	30.287	0.00845667	4.34986	0.143621	54.286	2.35145	44.534	13.1972	-453.914	805.234	54.286	2.35145	NA
1-235	433.862	10734.9	3.51194	19.2085	15.2115	0.0619775	15.497	0.0086343	2.96088	0.191062	55.4214	1.63393	61.0578	9.18348	288.057	349.422	55.4214	1.63393	NA
1-236	551.231	9207.78	3.20301	23.6442	13.2112	0.0515494	13.6499	0.00883987	3.43268	0.25148	56.7351	1.93899	51.0379	6.79454	-208.989	332.799	56.7351	1.93899	NA
1-237	122.915	50260.3	4.00243	13.9772	2.585	1.50154	3.51398	0.152215	2.38029	0.677378	913.367	20.2709	931.013	21.4202	973.044	52.7023	973.044	52.7023	93.867
1-238	218.034	1758.83	4.37792	19.6538	18.017	0.079779	19.8687	0.011372	8.37569	0.421552	72.8946	6.07104	77.9372	14.9068	235.447	418.661	72.8946	6.07104	NA
1-239	1526.12	18006.4	6.7785	21.0003	2.33601	0.0591628	2.85192	0.00901102	1.636	0.573648	57.8286	0.941843	58.363	1.61753	80.3236	55.4548	57.8286	0.941843	NA
1-240	2837.26	72974.6	6.55343	21.1346	1.93224	0.0673113	4.46814	0.0103177	4.02874	0.901659	66.1712	2.65223	66.1448	2.86124	65.2127	46.0095	66.1712	2.65223	NA
1-241	405.72	10565.1	3.41481	21.5919	11.402	0.09485	11.9926	0.0148534	3.71688	0.309932	95.0473	3.50688	92.0114	10.5497	13.9797	274.859	95.0473	3.50688	NA
1-242	289.348	5226.86	3.6062	21.1184	15.0121	0.0986015	15.4345	0.0151023	3.58608	0.232342	96.628	3.43932	95.4846	14.0667	66.9949	359.005	96.628	3.43932	NA
1-243	2355.18	61917.8	7.94892	20.9479	3.53052	0.0628431	4.24761	0.00954766	2.36169	0.556005	61.2562	1.43983	61.885	2.55014	86.3001	83.7448	61.2562	1.43983	NA
1-244	568.293	22215.4	3.53945	19.9987	4.30578	0.213775	10.7009	0.0310067	9.79638	0.915474	196.846	18.9924	196.715	19.139	195.17	100.126	196.846	18.9924	NA
1-245	549.821	4778.5	1.32983	24.4644	29.5577	0.0286631	30.0016	0.00508578	5.14194	0.171389	32.702	1.67726	28.6948	8.48857	-295.327	768.768	32.702	1.67726	NA
1-246	3127.28	65130.7	18.6084	21.0754	1.08623	0.0695092	2.44903	0.0106247	2.19496	0.896258	68.13	1.48755	68.2336	1.61615	71.8884	25.8519	68.13	1.48755	NA
1-247	712.61	5866.71	1.35611	20.4508	10.9037	0.0352451	13.6355	0.00522766	8.18755	0.600458	33.6119	2.74482	35.171	4.71368	142.956	256.51	33.6119	2.74482	NA
1-248	596.343	12617.1	3.18727	20.5109	6.57259	0.09799	7.25135	0.0145769	3.0632	0.422431	93.2904	2.83709	94.9193	6.5711	136.069	154.562	93.2904	2.83709	NA
1-249	309.131	11365.1	3.91313	24.1205	19.831	0.0844976	20.1888	0.0147819	3.78448	0.187454	94.5927	3.5537	82.3647	15.9732	-259.306	506.833	94.5927	3.5537	NA
1-250	1374	29217.8	5.30502	21.7592	6.96501	0.0643826	7.72921	0.0101604	3.35103	0.433554	65.1677	2.17279	63.3548	4.74722	-4.5881	168.182	65.1677	2.17279	NA
1-251	330.205	5328.48	3.50162	20.1665	13.2267	0.0641245	14.145	0.00937893	5.0135	0.354436	60.1787	3.00302	63.1084	8.65516	175.664	309.689	60.1787	3.00302	NA
1-252	684.531	8707.98	2.83952	21.1605	7.9235	0.0551235	9.91831	0.00845983	5.96582	0.601496	54.3062	3.2262	54.4833	5.26144	62.2623	189.001	54.3062	3.2262	NA
1-253	274.456	17634.6	1.86675	24.0642	5.72145	0.143042	7.41728	0.0249651	4.72029	0.636391	158.959	7.41159	135.75	9.42515	-253.383	144.976	158.959	7.41159	NA
1-254	331.29	8585.9	6.98882	19.1649	6.6106	0.071666	7.10255	0.00996136	2.59733	0.36569	63.8973	1.65143	70.2792	4.82282	293.226	151.091	63.8973	1.65143	NA
1-255	194.172	2524.06	4.94266	31.5904	74.4501	0.0391439	74.8641	0.00896847	7.86279	0.105027	57.5568	4.50542	38.9879	28.6423	-996.877	2550.39	57.5568	4.50542	NA
1-256	492.166	54492	3.98874	20.3624	11.3013	0.0999641	11.6519	0.0147629	2.83687	0.243468	94.4722	2.66051	96.7432	10.7525	153.083	265.418	94.4722	2.66051	NA
1-257	124.727	55967.3	1.71436	13.1176	1.60852	1.91284	3.60148	0.181983	3.22232	0.894721	1077.8	31.9824	1085.57	24.019	1101.19	32.1558	1101.19	32.1558	97.8759
1-258	536.061	14387.5	4.37319	23.0853	13.0799	0.0667847	13.3058	0.0111818	2.44133	0.183479	71.6825	1.74031	65.6437	8.45825	-149.302	325.613	71.6825	1.74031	NA
1-259	994.227	34590.1	2.2698	20.9569	4.5279	0.056622	5.53364	0.00860618	3.18108	0.574862	55.2416	1.74977	55.9243	3.01098	85.2846	107.449	55.2416	1.74977	NA
1-260	368.23	8283.98	2.07586	22.538	10.598	0.0632882	11.5041	0.0103452	4.47499	0.388992	66.3467	2.95378	62.3102	6.9528	-90.1256	260.494	66.3467	2.95378	NA
1-261	1279.12	33639.2	16.3862	20.4829	2.78452	0.0920808	4.5972	0.0136792	3.65796	0.795693	87.5838	3.18212	89.4398	3.93586	139.257	65.4072	87.5838	3.18212	NA
1-262	1535.98	26394.2	5.73151	20.3891	3.40697	0.0707035	5.57618	0.0104554	4.41433	0.79164	67.0497	2.94445	69.3668	3.73887	150.015	79.8614	67.0497	2.94445	NA
1-263	331.752	9767.18	5.14116	20.8073	11.557	0.100052	11.8169	0.0150988	2.465	0.208599	96.6053	2.36357	96.8246	10.9135	102.218	274.023	96.6053	2.36357	NA
1-264	356.327	6952.49	3.76359	23.2517	14.5949	0.0932906	15.4528	0.0157323	5.07732	0.32857	100.627	5.06951	90.5641	13.3895	-167.152	364.928	100.627	5.06951	NA
1-265	602.433	55169.2	4.32149	20.7578	5.70619	0.0981158	5.82576	0.0147713	1.17428	0.201567	94.5255	1.1019	95.0356	5.28539	107.881	134.872	94.5255	1.1019	NA
1-266	831.165	8273.12	2.08769	23.6198	11.0123	0.0317832	12.7405	0.00544468	6.40705	0.502887	35.0034	2.23661	31.7699	3.98501	-206.398	276.936	35.0034	2.23661	NA
1-267	2322.51	35525.9	5.41691	21.1287	2.4058	0.0605077	3.03075	0.00927218	1.84325	0.608184	59.4969	1.09163	59.6514	1.75581	65.8389	57.2577	59.4969	1.09163	NA
1-268	966.402	20587.1	3.50414	21.1705	4.91784	0.0668498	5.85907	0.0102643	3.18488	0.543581	65.8306	2.08596	65.7056	3.72784	61.1598	117.217	65.8306	2.08596	NA
1-269	747.086	28543.6	2.83176	20.4466	3.69487	0.100729	4.14277	0.0149374	1.87364	0.452266	95.5807	1.77762	97.4491	3.84944	143.429	86.7263	95.5807	1.77762	NA
1-270	316.324	10564.6	4.31784	20.9065	17.9552	0.0998358	18.1719	0.0151379	2.79794	0.153971	96.8539	2.68966	96.6248	16.7505	90.9524	428.382	96.8539	2.68966	NA
1-271	3938.89	39276.3	5.31457	20.762	0.873155	0.0681689	1.1085	0.0102649	0.682917	0.616072	65.8345	0.447307	66.9603	0.718311	107.396	20.6263	65.8345	0.447307	NA
1-272	495.082	6130.64	3.24244	20.5796	18.0911	0.0618173	19.1901	0.00922668	6.40078	0.333546	59.2063	3.77231	60.9046	11.3445	128.206	428.713	59.2063	3.77231	NA
1-273	1333.49	17785	2.94388	20.3793	8.49788	0.0586605	8.6404	0.00867027	1.56288	0.180881	55.6512	0.866021	57.8813	4.86134	151.132	199.407	55.6512	0.866021	NA
1-274	1949.33	70932.4	4.04498	20.705	3.61179	0.0704463	4.34416	0.0105787	2.41385	0.555655	67.8365	1.62889	69.1228	2.90289	113.873	85.2411	67.8365	1.62889	NA
1-275	383.518	8348.77	3.43475	21.6374	14.261	0.0935554	14.6069	0.0146816	3.15994	0.216332	93.9557	2.94741	90.81	12.6893	8.93585	344.626	93.9557	2.94741	NA
1-276	264.878	6434.67	4.48321	21.9644	20.4077	0.091916	22.0508	0.0146423	8.3525	0.378784	93.706	7.77019	89.2867	18.8498	-27.281	498.853	93.706	7.77019	NA
1-277	1797.52	15818.6	4.09052	22.4193	5.12654	0.0374578	5.72906	0.00609066	2.55748	0.446406	39.1438	0.998064	37.339	2.10032	-77.1916	125.479	39.1438	0.998064	NA
1-278	422.361	21834.1	4.85365	20.0435	11.7883	0.102207	12.32	0.0148578	3.58047	0.290622	95.0749	3.37915	98.8117	11.6005	189.96	275.078	95.0749	3.37915	NA
1-279	862.254	21338.9	3.44089	21.572	11.0447	0.061725	11.7427	0.00965718	3.98823	0.339635	61.9555	2.45909	60.8163	6.93192	16.2098	266.077	61.9555	2.45909	NA
1-280	349.11	129867	7.9492	11.5029	2.38539	1.91357	4.77376	0.159643	4.13506	0.866206	954.794	36.697	1085.83	31.8458	1359.02	45.9815	1359.02	45.9815	70.2559
1-281	2866.42	20393	3.04999	20.4662	4.71371	0.0609943	5.28293	0.00905367	2.38544	0.451537	58.1011	1.37974	60.1173	3.08377	141.182	110.711	58.1011	1.37974	NA
1-282	248.601	6944.43	3.61294	24.5567	19.4229	0.0819657	19.9381	0.0145983	4.50298	0.225848	93.4261	4.17662	79.9914	15.3379	-304.948	500.784	93.4261	4.17662	NA
1-283	769.364	12539.8	3.67438	21.0762	11.4515	0.064139	11.6853	0.00980424	2.32545	0.199007	62.8944	1.45547	63.1224	7.15154	71.7985	273.071	62.8944	1.45547	NA
1-284	470.076	2973.6	2.83911	21.962	24.0085	0.0346664	24.5269	0.00552177	5.016	0.204511	35.4977	1.77567	34.6033	8.34429	-27.01	588.902	35.4977	1.77567	NA
1-285	513.739	4092.09	4.75236	18.6872	17.9138	0.0662067	19.0929	0.00897317	6.60567	0.345975	57.5868	3.78705	65.0933	12.0388	350.588	407.759	57.5868	3.78705	NA
1-286	271.729	8700.42	5.22859	24.1747	16.7898	0.0796341	18.4264	0.0139624	7.59172	0.412002	89.3846	6.739	77.8008	13.8013	-264.997	428.59	89.3846	6.739	NA
1-287	373.208	6306.47	7.11507	27.2358	22.2074	0.0456518	22.5331	0.00901774	3.81724	0.169406	57.8715	2.19921	45.3272	9.9893	-577.291	606.806	57.8715	2.19921	NA
1-288	290.288	6499.33	5.11357	20.6826	9.68181	0.0957464	11.1479	0.0143624	5.52619	0.495715	91.9274	5.04403	92.8423	9.89122	116.397	228.776	91.9274	5.04403	NA
1-289	657.062	10545.2	3.45503	20.5447	11.2999	0.0658014	11.4848	0.00980467	2.05264	0.178726	62.8971	1.28477	64.7073	7.19979	132.184	266.41	62.8971	1.28477	NA
1-290	234.644	4186.68	5.27992	22.5729	21.47	0.0880567	21.9746	0.0144162	4.68176	0.213054	92.269	4.28905	85.6915	18.0596	-93.9221	532.072	92.269	4.28905	NA
1-291	415.501	7511.55	5.07043	21.9591	6.53077	0.0675799	7.30131	0.0107629	3.26469	0.447137	69.0116	2.241	66.4002	4.693	-26.6929	158.357	69.0116	2.241	NA
1-292	291.841	3968.2	4.60471	26.6504	25.7962	0.0479788	27.6005	0.00927367	9.81543	0.355625	59.5064	5.81393	47.5843	12.8312	-518.855	698.838	59.5064	5.81393	NA
1-293	1975.68	40217.1	4.14015	20.9597	2.67132	0.0648241	5.59649	0.00985419	4.9178	0.878729	63.2133	3.09351	63.7758	3.45944	84.9168	63.3594	63.2133	3.09351	NA
1-294	441.988	8583.49	3.17702	21.1922	10.3345	0.0969395	10.5729	0.0148996	2.2328	0.211182	95.3407	2.11311	93.9473	9.48758	58.7327	246.913	95.3407	2.11311	NA
1-295	1295.29	37960.7	5.95638	20.4853	5.17958	0.0998372	5.57634	0.0148332	2.06581	0.37046	94.9184	1.94647	96.6261	5.13981	138.955	121.704	94.9184	1.94647	NA
1-296	253.743	2771.82	5.55423	24.0713	28.6601	0.0519197	29.0575	0.00906422	4.78935	0.164823	58.1685	2.77336	51.3955	14.5636	-254.128	738.523	58.1685	2.77336	NA
1-297	574.577	13374.5	6.82914	21.8543	9.43063	0.0933178	9.95246	0.0147911	3.18038	0.319557	94.6513	2.98828	90.5894	8.6256	-15.1189	228.399	94.6513	2.98828	NA
1-298	309.231	4838.62	4.87323	21.4572	16.4002	0.0955395	17.1834	0.0148681	5.12886	0.298477	95.1402	4.84378	92.6506	15.217	29.0139	395.38	95.1402	4.84378	NA
1-299	400.133	10838.3	2.9255	24.4077	18.3826	0.059717	18.785	0.0105712	3.86735	0.205874	67.7884	2.60788	58.8941	10.7489	-289.397	472.086	67.7884	2.60788	NA
2 - Beluga Formation (Beluga River, Capps Glacier area)
							Isotope ratios						Apparent ages (Ma)
Analysis	U	206Pb	U/Th	206Pb*	±	207Pb*	±	206Pb*	±	error	206Pb*	±	207Pb*	±	206Pb*	±	Best age	±	Conc
	(ppm)	204Pb		207Pb*	(%)	235U*	(%)	238U	(%)	corr.	238U*	(Ma)	235U	(Ma)	207Pb*	(Ma)	(Ma)	(Ma)	(%)
2-1	166	1886	1.8	20.6111	16.9	0.0701	17.3	0.0105	3.6	0.21	67.2	2.4	68.8	11.5	124.6	401.1	67.2	2.4	54
2-2	249	3422	3.1	21.4363	9.3	0.0744	9.3	0.0116	0.7	0.07	74.1	0.5	72.9	6.5	31.3	222.4	74.1	0.5	236.8
2-3	441	3950	7.3	16.7804	2.6	0.5105	2.6	0.0621	0.5	0.19	388.6	1.9	418.8	9.1	588.8	56.3	388.6	1.9	66
2-4	468	5830	2.4	21.7629	5.6	0.1005	5.7	0.0159	1.1	0.19	101.4	1.1	97.2	5.3	-5	136	101.4	1.1	-2028.7
2-5	185	1902	2	21.0181	16.9	0.0738	17	0.0113	1.8	0.1	72.2	1.3	72.3	11.8	78.3	403	72.2	1.3	92.1
2-6	162	1460	3	22.9479	20.5	0.068	20.6	0.0113	1.3	0.06	72.5	0.9	66.8	13.3	-134.5	512.8	72.5	0.9	-53.9
2-7	390	48466	13.1	13.8389	2.1	1.6763	2.2	0.1683	0.6	0.27	1002.5	5.6	999.6	13.9	993.3	42.7	1002.5	5.6	100.9
2-8	600	6792	16.7	21.6328	8.9	0.0692	9.2	0.0109	2.2	0.24	69.6	1.5	67.9	6	9.5	214.2	69.6	1.5	736.3
2-9	182	1988	3.1	24.2702	22.4	0.0646	22.5	0.0114	2.7	0.12	72.9	1.9	63.6	13.9	-275	574.6	72.9	1.9	-26.5
2-10	466	4994	10.5	23.0854	10.2	0.0678	10.2	0.0114	1	0.1	72.8	0.7	66.6	6.6	-149.3	252.9	72.8	0.7	-48.7
2-11	1147	12996	3.2	21.2079	2.2	0.0988	2.9	0.0152	1.8	0.64	97.2	1.8	95.6	2.6	56.9	52.8	97.2	1.8	170.8
2-12	1044	7222	4.5	20.1699	8.5	0.0615	8.7	0.009	2.1	0.24	57.7	1.2	60.6	5.1	175.3	197.6	57.7	1.2	32.9
2-13	1096	8802	4	20.9602	4.8	0.0605	5.2	0.0092	2.1	0.4	59	1.2	59.6	3	84.9	114.2	59	1.2	69.5
2-14	467	3486	4.4	19.9166	11.1	0.0814	11.2	0.0118	0.7	0.07	75.4	0.5	79.5	8.5	204.7	258.9	75.4	0.5	36.8
2-15	1118	7380	1.4	20.423	7.6	0.0691	7.7	0.0102	1.4	0.18	65.6	0.9	67.8	5.1	146.1	178.9	65.6	0.9	44.9
2-16	6540	1500	5.5	16.3251	13.7	0.0777	14.7	0.0092	5.1	0.35	59	3	75.9	10.7	648.2	296.5	59	3	9.1
2-17	322	25310	3.7	18.1906	1.7	0.5154	3	0.068	2.5	0.82	424.1	10.1	422.1	10.3	411.1	37.9	424.1	10.1	103.1
2-18	114	1196	4.3	28.1289	26.8	0.0553	27.2	0.0113	4.4	0.16	72.3	3.2	54.6	14.5	-665.4	750.7	72.3	3.2	-10.9
2-19	214	3652	2.8	26.679	23.9	0.0565	23.9	0.0109	1.1	0.05	70	0.8	55.8	13	-521.7	645.8	70	0.8	-13.4
2-20	122	23362	1.2	8.9592	1.8	4.2678	1.9	0.2773	0.5	0.27	1577.8	7	1687.2	15.5	1825.9	32.8	1825.9	32.8	86.4
2-21	1502	7864	3.5	21.7273	2.6	0.0389	2.8	0.0061	1	0.36	39.4	0.4	38.7	1	-1.1	62.1	39.4	0.4	-3745.1
2-22	1783	7580	2.3	20.7372	4.5	0.0656	4.5	0.0099	0.6	0.13	63.3	0.4	64.5	2.8	110.2	105.9	63.3	0.4	57.4
2-23	292	2262	3.3	18.737	24.4	0.0754	24.5	0.0102	2	0.08	65.7	1.3	73.8	17.4	344.6	560	65.7	1.3	19.1
2-24	162	1102	2.9	20.715	14.6	0.075	14.7	0.0113	1.6	0.11	72.3	1.2	73.5	10.4	112.7	346.3	72.3	1.2	64.1
2-25	218	1054	2.9	23.99	22	0.0339	22.5	0.0059	4.6	0.2	37.9	1.7	33.8	7.5	-245.6	562.7	37.9	1.7	-15.4
2-26	190	1634	4.5	21.0882	36.9	0.0613	37	0.0094	2.8	0.07	60.2	1.7	60.4	21.7	70.5	904.3	60.2	1.7	85.4
2-27	214	2442	2.4	23.9159	12.8	0.0648	14.8	0.0112	7.5	0.5	72.1	5.3	63.8	9.2	-237.8	324	72.1	5.3	-30.3
2-28	1034	8924	5.8	21.1267	6.4	0.0683	7.3	0.0105	3.5	0.48	67.1	2.4	67.1	4.8	66.1	153.3	67.1	2.4	101.6
2-29	613	2836	4.6	22.3938	7.2	0.057	7.3	0.0093	0.7	0.09	59.4	0.4	56.3	4	-74.4	177.1	59.4	0.4	-79.9
2-30	635	16018	4.5	19.205	7.4	0.1946	7.5	0.0271	1.3	0.17	172.4	2.2	180.6	12.4	288.5	169.1	172.4	2.2	59.8
2-31	673	9434	4.1	20.3758	4.5	0.1031	4.6	0.0152	0.7	0.16	97.4	0.7	99.6	4.4	151.6	106.6	97.4	0.7	64.3
2-32	1127	6916	1.5	22.3142	6.5	0.0608	6.6	0.0098	1.4	0.2	63.2	0.8	60	3.8	-65.7	157.7	63.2	0.8	-96.1
2-33	967	7296	2.8	17.7874	19.3	0.0757	19.4	0.0098	2.3	0.12	62.7	1.4	74.1	13.9	461	431.8	62.7	1.4	13.6
2-34	322	2900	3.5	22.0149	16.4	0.06	16.6	0.0096	2.1	0.13	61.5	1.3	59.2	9.5	-32.9	401.2	61.5	1.3	-187.2
2-35	139	1124	3.3	23.2783	41.3	0.0642	41.4	0.0108	3.2	0.08	69.5	2.2	63.2	25.4	-170	1068.9	69.5	2.2	-40.9
2-36	250	2392	2.8	22.6671	19.4	0.0688	19.5	0.0113	1.6	0.08	72.5	1.1	67.5	12.7	-104.1	480.8	72.5	1.1	-69.6
2-37	725	4848	3.9	22.7469	9.3	0.0527	9.4	0.0087	0.9	0.1	55.9	0.5	52.2	4.8	-112.8	230	55.9	0.5	-49.5
2-38	246	2226	2.7	23.4463	14.1	0.0668	14.5	0.0114	3.4	0.23	72.9	2.4	65.7	9.2	-187.9	354.1	72.9	2.4	-38.8
2-39	196	1352	2.2	30.8738	61.6	0.0367	61.6	0.0082	2.6	0.04	52.8	1.4	36.6	22.2	-929.4	1962.5	52.8	1.4	-5.7
2-40	94	884	3	18.6375	35.5	0.0764	36.2	0.0103	7.4	0.2	66.2	4.8	74.7	26.1	356.6	824.9	66.2	4.8	18.6
2-41	390	13750	2.9	19.8573	1.4	0.2233	3.1	0.0322	2.8	0.89	204	5.6	204.7	5.8	211.6	33	204	5.6	96.4
2-42	31	4568	0.8	8.4776	1.8	5.6368	2.7	0.3466	2	0.74	1918.2	33.3	1921.7	23.3	1925.5	32.5	1925.5	32.5	99.6
2-43	636	20930	2.3	18.7775	3	0.3281	3.2	0.0447	1.1	0.35	281.8	3.1	288.1	7.9	339.7	67	281.8	3.1	82.9
2-44	473	5902	3.2	20.8353	7.8	0.1013	7.9	0.0153	0.6	0.08	97.9	0.6	97.9	7.3	99	185.5	97.9	0.6	98.9
2-45	269	4766	2.4	19.7947	7.3	0.1153	7.8	0.0166	2.8	0.35	105.9	2.9	110.8	8.2	218.9	168.9	105.9	2.9	48.4
2-46	459	9346	2.3	19.8945	5.6	0.1938	5.8	0.028	1.8	0.3	177.8	3.1	179.8	9.6	207.3	129.2	177.8	3.1	85.8
2-47	285	4244	3.7	20.625	9	0.105	9	0.0157	0.7	0.07	100.5	0.7	101.4	8.7	123	211.9	100.5	0.7	81.7
2-48	542	3554	3.2	20.7921	4.1	0.105	4.2	0.0158	1	0.23	101.2	1	101.3	4.1	104	96.7	101.2	1	97.4
2-49	81	744	1.7	25.7261	31.4	0.0616	31.5	0.0115	2.7	0.09	73.6	2	60.7	18.6	-425.4	839.9	73.6	2	-17.3
2-50	191	2300	3.4	22.3884	20.8	0.0705	21	0.0114	2.3	0.11	73.4	1.7	69.2	14	-73.8	513.9	73.4	1.7	-99.4
2-51	207	2148	5	26.669	22.6	0.058	22.9	0.0112	3.5	0.15	72	2.5	57.3	12.8	-520.7	611.7	72	2.5	-13.8
2-52	513	4442	5.3	22.1192	5.7	0.0648	5.8	0.0104	1.4	0.24	66.7	0.9	63.7	3.6	-44.3	137.9	66.7	0.9	-150.4
2-53	3220	17894	4	21.0487	2.2	0.0586	2.7	0.009	1.6	0.59	57.5	0.9	57.9	1.5	74.9	52	57.5	0.9	76.7
2-54	163	2276	3.6	26.4011	22.8	0.0587	22.8	0.0112	1.1	0.05	72	0.8	57.9	12.8	-493.8	612.5	72	0.8	-14.6
2-55	714	3772	2.5	21.4517	11.1	0.0555	11.6	0.0086	3.2	0.28	55.4	1.8	54.8	6.2	29.6	267.5	55.4	1.8	186.8
2-56	634	3026	2.1	23.8867	13.6	0.0321	13.6	0.0056	0.9	0.06	35.7	0.3	32.1	4.3	-234.7	344.7	35.7	0.3	-15.2
2-57	99	460	3	19.0996	38.3	0.0753	38.7	0.0104	5.5	0.14	66.9	3.7	73.7	27.5	301.1	903.2	66.9	3.7	22.2
2-58	195	30990	6.1	13.0745	1.4	1.8961	1.5	0.1798	0.8	0.48	1065.9	7.4	1079.7	10.3	1107.8	27	1107.8	27	96.2
2-59	348	2800	5.1	23.2562	12.7	0.0579	12.8	0.0098	1.3	0.1	62.7	0.8	57.2	7.1	-167.6	317.6	62.7	0.8	-37.4
2-60	199	2012	3.3	25.201	17.9	0.0591	18	0.0108	1.2	0.07	69.3	0.8	58.3	10.2	-371.7	468.1	69.3	0.8	-18.6
2-61	154	11254	2.6	20.4336	14.4	0.1526	14.6	0.0226	2.1	0.14	144.1	3	144.2	19.6	144.9	339.6	144.1	3	99.5
2-62	2735	2780	1.9	15.3175	26.4	0.1024	26.5	0.0114	0.8	0.03	73	0.6	99	25	783.5	565	73	0.6	9.3
2-63	1300	15204	3	21.6945	2.9	0.063	2.9	0.0099	0.5	0.18	63.6	0.3	62	1.8	2.6	69.8	63.6	0.3	2449.7
2-64	1054	9018	2.3	21.0084	2.8	0.0959	2.9	0.0146	0.7	0.23	93.5	0.6	93	2.5	79.4	66.1	93.5	0.6	117.8
2-65	105	1268	2	37.8018	49.3	0.0369	49.4	0.0101	3.8	0.08	64.8	2.5	36.8	17.9	-1563.7	1750.1	64.8	2.5	-4.1
2-66	773	28530	7.7	8.47	6.8	1.2022	8.9	0.0739	5.6	0.64	459.3	25	801.6	49.1	1927.1	122.5	1927.1	122.5	23.8
2-67	268	2834	6.7	23.8761	12.7	0.0494	13.4	0.0086	4.2	0.31	54.9	2.3	49	6.4	-233.6	321.5	54.9	2.3	-23.5
2-68	861	12236	3.9	20.6862	24.3	0.0699	24.3	0.0105	1.2	0.05	67.3	0.8	68.6	16.1	116	579.3	67.3	0.8	58
2-69	825	10314	1.8	21.2495	4.3	0.0941	4.5	0.0145	1.2	0.27	92.9	1.1	91.4	3.9	52.3	102.3	92.9	1.1	177.7
2-70	224	1268	1.9	24.0664	12.5	0.0294	13.2	0.0051	4.4	0.33	33	1.4	29.4	3.8	-253.6	317	33	1.4	-13
2-71	241	3378	4	20.6671	9.1	0.095	9.6	0.0142	3.1	0.32	91.2	2.8	92.2	8.5	118.2	215.8	91.2	2.8	77.1
2-72	1117	10924	3	21.465	2.9	0.0652	3.2	0.0102	1.4	0.45	65.1	0.9	64.1	2	28.1	69.1	65.1	0.9	231.6
2-73	1989	18154	3.6	21.0148	1.9	0.0994	2.3	0.0152	1.3	0.57	96.9	1.2	96.2	2.1	78.7	44.5	96.9	1.2	123.2
2-74	181	5440	0.7	18.6441	3.7	0.411	4.1	0.0556	1.7	0.42	348.6	5.9	349.6	12.2	355.8	84.7	348.6	5.9	98
2-75	1169	9584	2.8	20.6066	4.8	0.1096	4.9	0.0164	0.8	0.16	104.8	0.8	105.6	4.9	125.1	113.2	104.8	0.8	83.8
2-76	221	3342	2.3	20.6726	5.7	0.2077	6.3	0.0311	2.7	0.44	197.7	5.3	191.6	11	117.5	133.5	197.7	5.3	168.2
2-77	161	1550	2.3	23.3306	57.6	0.0717	57.7	0.0121	1.4	0.02	77.7	1.1	70.3	39.2	-175.6	1559.3	77.7	1.1	-44.2
2-78	1183	4800	2.8	22.4048	7.5	0.0559	7.5	0.0091	0.8	0.11	58.3	0.5	55.3	4	-75.6	182.6	58.3	0.5	-77.2
2-79	473	3210	2.1	23.689	14.5	0.0601	14.9	0.0103	3.6	0.24	66.2	2.4	59.3	8.6	-213.7	366	66.2	2.4	-31
2-80	146	10906	1.8	12.1292	3.2	2.432	4.7	0.2139	3.4	0.72	1249.8	38.2	1252.1	33.6	1256.2	63.2	1256.2	63.2	99.5
2-81	900	8096	1.9	21.2447	11.8	0.0705	12.1	0.0109	2.5	0.21	69.6	1.7	69.2	8.1	52.8	283.2	69.6	1.7	131.8
2-82	270	56228	1.9	12.0514	2.3	2.5164	3	0.2199	1.9	0.63	1281.6	22.1	1276.8	21.9	1268.7	45.7	1268.7	45.7	101
2-83	507	3642	4.9	26.8483	22.7	0.0482	22.8	0.0094	2	0.09	60.3	1.2	47.8	10.7	-538.7	616.1	60.3	1.2	-11.2
2-84	379	3906	4.3	21.8901	16.2	0.0596	16.3	0.0095	1.4	0.09	60.8	0.9	58.8	9.3	-19.1	393.8	60.8	0.9	-318.5
2-85	338	3556	3.4	23.1924	13.1	0.0947	14.1	0.0159	5.3	0.38	101.9	5.4	91.9	12.4	-160.8	326.7	101.9	5.4	-63.4
2-86	206	2804	1.8	20.656	44.1	0.0641	44.5	0.0096	5.7	0.13	61.6	3.5	63.1	27.2	119.5	1088	61.6	3.5	51.6
2-87	163	1726	2.5	19.8073	32.3	0.0798	32.5	0.0115	3.4	0.11	73.4	2.5	77.9	24.4	217.5	765	73.4	2.5	33.8
2-88	1683	6830	3.8	21.9165	5.4	0.0557	5.5	0.0089	1.3	0.24	56.8	0.7	55.1	3	-22	130.3	56.8	0.7	-258.5
2-89	1613	12032	5.3	20.3597	6.9	0.0584	7.2	0.0086	1.8	0.24	55.4	1	57.6	4	153.4	162.6	55.4	1	36.1
2-90	368	52950	1.9	6.7959	1.2	8.6847	1.7	0.4281	1.2	0.7	2296.9	22.4	2305.5	15.1	2313	20.4	2313	20.4	99.3
2-91	185	1754	1.4	21.8687	23.8	0.061	24.1	0.0097	3.4	0.14	62.1	2.1	60.2	14.1	-16.7	582.9	62.1	2.1	-371.8
2-92	203	2374	2	26.145	21.9	0.058	22.2	0.011	3.5	0.16	70.6	2.5	57.3	12.4	-468	584.8	70.6	2.5	-15.1
2-93	726	6614	3.7	20.0166	6.4	0.0725	6.5	0.0105	1	0.16	67.5	0.7	71.1	4.4	193.1	148.5	67.5	0.7	35
2-94	1184	7378	4	20.3921	25.5	0.0638	25.6	0.0094	0.5	0.02	60.6	0.3	62.8	15.6	149.7	607.5	60.6	0.3	40.5
2-95	217	30100	1.5	11.3952	2	2.7686	3.7	0.2288	3.1	0.84	1328.3	37.5	1347.1	27.7	1377.1	38.7	1377.1	38.7	96.5
2-96	411	2740	4.3	18.3417	32.2	0.067	32.5	0.0089	4.2	0.13	57.2	2.4	65.8	20.7	392.6	739.8	57.2	2.4	14.6
2-97	145	30220	1.2	8.1864	1.6	5.8415	2.5	0.3468	1.9	0.75	1919.4	30.9	1952.6	21.5	1987.9	29	1987.9	29	96.6
2-98	569	7860	3.7	20.6983	5.4	0.0992	5.7	0.0149	1.9	0.33	95.3	1.7	96	5.2	114.6	126.8	95.3	1.7	83.1
2-99	389	5604	2	20.9981	11.6	0.1169	11.7	0.0178	0.7	0.06	113.7	0.8	112.2	12.4	80.6	277	113.7	0.8	141.2
2-100	182	2752	1	19.6407	20	0.1102	20	0.0157	1.3	0.06	100.4	1.3	106.1	20.2	237	464.7	100.4	1.3	42.4
2-101	1260	8066	2.8	20.9225	2.3	0.0703	3.7	0.0107	2.9	0.78	68.4	2	69	2.4	89.2	53.9	68.4	2	76.8
2-102	307	15952	2	17.7621	3	0.4914	3.2	0.0633	1.1	0.36	395.7	4.3	405.9	10.6	464.2	65.9	395.7	4.3	85.2
3 - Tyonek Formation (Beluga River, Capps Glacier area)
							Isotope ratios						Apparent ages (Ma)
Analysis	U	206Pb	U/Th	206Pb*	±	207Pb*	±	206Pb*	±	error	206Pb*	±	207Pb*	±	206Pb*	±	Best age	±	Conc
	(ppm)	204Pb		207Pb*	(%)	235U*	(%)	238U	(%)	corr.	238U*	(Ma)	235U	(Ma)	207Pb*	(Ma)	(Ma)	(Ma)	(%)
3-1	596.511	4626	3.9018	17.8436	30.0886	0.111606	30.314	0.0144434	3.69	0.121726	92.4423	3.38678	107.433	30.9133	454.069	681.966	92.4423	3.38678	20.3587
3-2	70.1575	33314	2.49236	6.56796	1.22067	9.4037	1.42746	0.447949	0.740003	0.518404	2386.13	14.758	2378.19	13.1018	2371.39	20.8188	2371.39	20.8188	100.622
3-3	293.358	14868	1.53538	17.4622	3.27987	0.547462	4.0999	0.0693347	2.46	0.600015	432.146	10.2823	443.332	14.7288	501.836	72.2324	432.146	10.2823	86.113
3-4	737.562	4826	4.49473	18.1215	7.3036	0.127002	7.32069	0.0166918	0.500001	0.0682997	106.714	0.529178	121.4	8.37677	419.628	163.275	106.714	0.529178	25.4306
3-5	1807.52	1080	4.566	7.96159	16.2682	0.974379	16.3154	0.0562635	1.24003	0.0760034	352.861	4.25798	690.718	81.9345	2037.3	289.783	2037.3	289.783	17.3201
3-6	175.939	2510	3.56537	17.669	26.6151	0.120481	26.7304	0.0154394	2.48	0.0927783	98.7683	2.43079	115.508	29.1924	475.837	598.18	98.7683	2.43079	20.7567
3-7	332.567	3150	3.78285	22.1331	18.8057	0.0556682	18.8378	0.00893612	1.1	0.0583932	57.3501	0.628053	55.0073	10.0868	-45.8558	460.695	57.3501	0.628053	-125.066
3-8	1432.51	21286	5.42237	20.876	1.63801	0.10289	2.17439	0.0155782	1.43	0.657656	99.6492	1.41403	99.4401	2.05971	94.4242	38.7998	99.6492	1.41403	105.534
3-9	950.356	14656	6.37204	19.9116	5.13273	0.104356	5.24928	0.0150703	1.1	0.209553	96.4245	1.05278	100.789	5.03664	205.295	119.136	96.4245	1.05278	46.9687
3-10	672.317	4266	2.44379	21.2591	5.0475	0.0998787	5.32609	0.0153998	1.7	0.319183	98.517	1.66206	96.6643	4.911	51.1785	120.536	98.517	1.66206	192.497
3-11	121.055	1880	6.47012	25.4149	19.8816	0.0799668	20.6019	0.01474	5.4	0.262111	94.3264	5.05654	78.1137	15.4907	-393.617	522.046	94.3264	5.05654	-23.964
3-12	1152.07	6660	4.35666	21.9316	3.74739	0.0560142	4.09456	0.00890977	1.65	0.402974	57.1817	0.939326	55.34	2.20529	-23.6551	90.7628	57.1817	0.939326	-241.731
3-13	563.573	11418	1.63205	20.873	6.99361	0.107412	7.02104	0.0162606	0.62	0.088306	103.98	0.639503	103.595	6.91484	94.7864	165.745	103.98	0.639503	109.699
3-14	239.963	1220	2.56126	18.6218	10.5765	0.0908837	11.9396	0.0122745	5.54	0.464002	78.6451	4.33047	88.3262	10.1005	358.493	239.281	78.6451	4.33047	21.9377
3-15	1059.7	10386	9.62773	17.883	3.04686	0.428993	3.41846	0.0556404	1.55	0.453421	349.058	5.26653	362.461	10.4207	449.129	67.6996	349.058	5.26653	77.7188
3-16	89.9737	990	3.28149	26.3537	29.7705	0.0804383	29.9934	0.0153746	3.65	0.121693	98.3566	3.56277	78.557	22.6773	-489.025	805.344	98.3566	3.56277	-20.1128
3-17	268.609	8572	1.97022	19.6214	3.15221	0.320473	6.74226	0.0456057	5.96	0.883977	287.487	16.7578	282.266	16.6164	239.263	72.7143	287.487	16.7578	120.155
3-18	157.351	1702	4.76285	25.8951	31.5658	0.0454857	32.0414	0.00854263	5.5	0.171653	54.8354	3.00316	45.1658	14.1555	-442.622	847.907	54.8354	3.00316	-12.3888
3-19	1848.91	29256	20.6964	20.7706	2.93532	0.0989441	3.29184	0.0149052	1.49	0.452635	95.3761	1.41064	95.8012	3.00943	106.375	69.3658	95.3761	1.41064	89.6601
3-20	292.25	3354	3.19405	21.7466	11.3596	0.101787	11.4689	0.0160539	1.58	0.137764	102.668	1.60931	98.4242	10.7588	-3.18566	274.726	102.668	1.60931	-3222.82
3-21	172.341	4722	5.48231	28.6579	30.3878	0.0444113	30.4008	0.00923076	0.890001	0.0292756	59.2323	0.524753	44.1219	13.1269	-717.037	862.808	59.2323	0.524753	-8.2607
3-22	256.933	4022	2.97233	21.9937	5.52868	0.0913189	6.26178	0.0145666	2.94	0.469515	93.2249	2.72109	88.7313	5.32036	-30.5094	134.105	93.2249	2.72109	-305.561
3-23	470.852	1172	4.83851	18.137	22.7645	0.068932	22.8928	0.00906744	2.42	0.10571	58.189	1.40184	67.6854	14.991	417.719	514.462	58.189	1.40184	13.9302
3-24	135.756	34304	3.76355	9.32787	2.42021	4.45853	3.3319	0.301629	2.29	0.687296	1699.38	34.2093	1723.29	27.6404	1752.43	44.2987	1752.43	44.2987	96.9728
3-25	141.649	1980	5.70384	22.8565	149.329	0.0463696	149.518	0.00768674	7.5	0.0501613	49.3624	3.68804	46.024	67.3764	-124.648	1628.19	49.3624	3.68804	-39.6013
3-26	963.322	10722	5.30734	20.7786	4.37439	0.096062	5.01376	0.0144766	2.45	0.488656	92.6532	2.25377	93.1348	4.46183	105.465	103.415	92.6532	2.25377	87.8519
3-27	764.915	9230	1.88131	20.7216	4.29945	0.114052	4.47469	0.0171406	1.24	0.277114	109.559	1.34705	109.665	4.65151	111.989	101.52	109.559	1.34705	97.8303
3-28	1092.98	4730	5.31215	19.8109	4.53942	0.102944	4.6708	0.0147912	1.1	0.235506	94.652	1.03357	99.4902	4.42661	217.016	105.136	94.652	1.03357	43.6151
3-29	638.545	4698	11.5088	21.415	5.83592	0.0656913	5.9332	0.0102029	1.07	0.180341	65.4391	0.696656	64.6024	3.71362	33.702	139.853	65.4391	0.696656	194.17
3-30	496.318	2012	2.91728	18.7331	15.9281	0.07076	16.0053	0.00961384	1.57	0.0980928	61.6788	0.963739	69.4204	10.74	345.055	362.363	61.6788	0.963739	17.8751
3-31	1420.06	3650	5.20963	18.9025	8.92804	0.0937952	9.5184	0.0128587	3.3	0.346697	82.3644	2.70074	91.0326	8.28796	324.623	203.056	82.3644	2.70074	25.3724
3-32	1021.1	14982	2.60313	21.04	1.84925	0.095027	3.19872	0.0145008	2.61	0.815951	92.807	2.40491	92.1755	2.81858	75.8371	43.9385	92.807	2.40491	122.377
3-33	141.382	30120	3.97213	9.22091	2.6803	4.86878	2.82106	0.325606	0.880001	0.311939	1817.05	13.9341	1796.87	23.7681	1773.51	48.9312	1773.51	48.9312	102.455
3-34	243.288	4006	4.72716	23.3784	20.461	0.0822723	21.2618	0.0139498	5.78	0.27185	89.3045	5.12621	80.279	16.4128	-180.694	515.185	89.3045	5.12621	-49.423
3-35	620.875	9052	3.56696	21.2255	4.40082	0.0963627	4.77774	0.0148342	1.86	0.389305	94.9253	1.75268	93.4133	4.26393	54.9686	105.012	94.9253	1.75268	172.69
3-36	238.44	51568	3.01191	9.35568	1.92058	3.53875	3.91366	0.240117	3.41	0.871307	1387.31	42.5638	1535.92	30.9928	1746.98	35.1748	1746.98	35.1748	79.4117
3-37	1310.68	11982	4.42988	20.51	4.54879	0.105408	4.59642	0.0156797	0.66	0.14359	100.293	0.656814	101.756	4.45043	136.123	106.918	100.293	0.656814	73.6788
3-38	251.784	12928	2.25871	18.9609	2.52884	0.421196	2.62393	0.0579218	0.7	0.266775	362.975	2.47062	356.906	7.89627	317.61	57.479	362.975	2.47062	114.283
3-39	920.854	9066	4.56978	21.0365	4.10673	0.096921	4.2515	0.0147873	1.1	0.258732	94.6274	1.0333	93.9302	3.81431	76.2357	97.5884	94.6274	1.0333	124.125
3-40	304.661	3788	5.2441	24.8352	15.0802	0.0460502	16.3126	0.00829464	6.22	0.3813	53.2502	3.29852	45.7139	7.29189	-333.882	389.85	53.2502	3.29852	-15.9488
3-41	254.72	12404	2.63731	18.4551	2.3457	0.434281	2.52333	0.0581282	0.93	0.368561	364.232	3.29344	366.212	7.75799	378.743	52.7609	364.232	3.29344	96.1686
3-42	2299.28	18594	3.48118	21.1709	2.9785	0.0683175	3.19642	0.0104899	1.16	0.362906	67.2698	0.776272	67.1016	2.07551	61.1299	70.9612	67.2698	0.776272	110.044
3-43	262.437	1444	4.40651	22.3729	15.1076	0.0449597	15.3834	0.00729531	2.9	0.188515	46.8578	1.35395	44.6548	6.72066	-72.1154	370.971	46.8578	1.35395	-64.9762
3-44	681.291	7792	2.257	21.0044	6.84304	0.100247	6.90866	0.0152716	0.95	0.137508	97.7026	0.921176	97.0047	6.39165	79.86	162.63	97.7026	0.921176	122.342
3-45	214.654	5564	3.82618	20.8987	5.77295	0.205176	5.88443	0.0310988	1.14	0.193732	197.422	2.21649	189.496	10.1724	91.8542	136.84	197.422	2.21649	214.929
3-46	121.7	3378	3.18066	24.5834	21.3863	0.0844304	21.867	0.0150536	4.56	0.208533	96.3185	4.35947	82.3017	17.2886	-307.732	552.624	96.3185	4.35947	-31.2994
3-47	367.223	2972	4.59142	21.8045	15.0639	0.0578429	15.1069	0.00914734	1.14	0.075462	58.6995	0.666137	57.0969	8.38774	-9.60507	365.494	58.6995	0.666137	-611.13
3-48	159.019	6014	2.99497	17.6983	3.16225	0.555276	3.32577	0.0712751	1.03	0.309704	443.833	4.41767	448.447	12.0571	472.158	69.9862	443.833	4.41767	94.0009
3-49	2235.38	12828	3.96113	20.085	2.64781	0.109051	2.91536	0.0158855	1.22	0.418474	101.599	1.2298	105.097	2.91071	185.098	61.6882	101.599	1.2298	54.8895
3-50	232.735	6928	3.33918	21.0244	6.67953	0.210844	7.2819	0.0321503	2.9	0.398248	203.992	5.82315	194.261	12.8757	77.6025	158.815	203.992	5.82315	262.868
3-51	756.786	10464	3.11792	21.1836	4.81971	0.0951173	4.98169	0.0146136	1.26	0.252926	93.5238	1.16989	92.2592	4.39347	59.6999	114.907	93.5238	1.16989	156.657
3-52	237.461	1452	5.84965	26.4432	22.3281	0.0404878	22.8877	0.00776491	5.03	0.219769	49.8625	2.49841	40.3001	9.04336	-498.043	600.223	49.8625	2.49841	-10.0117
3-53	744.087	7266	2.26363	19.9352	6.90377	0.102164	7.50763	0.0147712	2.95	0.392934	94.5251	2.76815	98.7721	7.0663	202.546	160.391	94.5251	2.76815	46.6685
3-54	120.754	2410	2.73959	22.6693	21.2424	0.0893052	22.3104	0.014683	6.82	0.305688	93.9643	6.36189	86.8559	18.5743	-104.387	527.369	93.9643	6.36189	-90.0155
3-55	713.329	6304	3.77743	22.1337	5.52631	0.0633741	5.58829	0.0101734	0.83	0.148525	65.2504	0.538847	62.3922	3.38171	-45.918	134.447	65.2504	0.538847	-142.102
3-56	268.298	8748	2.46972	18.9559	4.11656	0.355572	4.91754	0.0488844	2.69	0.547021	307.669	8.0819	308.903	13.0981	318.212	93.591	307.669	8.0819	96.6869
3-57	222.905	4824	2.74458	20.9299	11.4888	0.213874	11.5534	0.0324657	1.22	0.105596	205.962	2.47302	196.798	20.6721	88.338	273.105	205.962	2.47302	233.152
3-58	687.118	7890	1.93995	21.9099	4.18389	0.0700523	4.2372	0.0111317	0.67	0.158123	71.3632	0.475497	68.7491	2.81661	-21.2675	101.273	71.3632	0.475497	-335.551
3-59	374.062	3546	17.4283	20.968	15.3539	0.0658521	15.6941	0.0100144	3.25	0.207084	64.2359	2.0773	64.7556	9.84586	83.9828	366.109	64.2359	2.0773	76.4869
3-60	382.335	2914	4.76198	21.4814	9.9284	0.0589461	11.1119	0.00918369	4.99	0.44907	58.9317	2.92729	58.1552	6.28063	26.2952	238.601	58.9317	2.92729	224.116
3-61	79.8432	4922	3.01072	18.6317	6.82231	0.427829	7.51442	0.0578127	3.15	0.419194	362.309	11.098	361.634	22.8661	357.284	154.161	362.309	11.098	101.407
3-62	420.756	6582	2.60385	19.752	2.25774	0.196993	2.47336	0.0282203	1.01	0.408352	179.4	1.78696	182.579	4.13313	223.944	52.2309	179.4	1.78696	80.1091
3-63	459.043	5366	3.22929	20.3203	4.23105	0.101054	4.62184	0.0148931	1.86	0.402437	95.2989	1.75952	97.7492	4.30719	157.917	99.0618	95.2989	1.75952	60.3474
3-64	2400.07	18548	4.67693	21.0827	1.87247	0.0935736	2.09071	0.014308	0.93	0.444825	91.5814	0.845685	90.8269	1.81647	71.0677	44.5598	91.5814	0.845685	128.865
3-65	367.879	1810	2.32348	19.1515	9.40605	0.107138	9.61425	0.0148815	1.99	0.206984	95.2255	1.88106	103.344	9.44714	294.819	215.108	95.2255	1.88106	32.2996
3-66	163.156	42544	3.00297	8.69198	1.40037	5.26581	2.30433	0.331957	1.83	0.794156	1847.86	29.4012	1863.34	19.6661	1880.63	25.231	1880.63	25.231	98.2575
3-67	163.723	2646	2.92127	22.8076	21.9539	0.0931872	22.1787	0.0154146	3.15	0.142028	98.6111	3.08261	90.468	19.1991	-119.36	546.983	98.6111	3.08261	-82.6163
3-68	1066.91	13328	3.97841	20.4859	3.34897	0.0975371	3.5188	0.0144919	1.08	0.306922	92.7501	0.99453	94.5004	3.17524	138.884	78.6719	92.7501	0.99453	66.7826
3-69	815.635	19066	3.50859	20.271	3.2717	0.200337	3.39323	0.0294533	0.9	0.265234	187.126	1.65992	185.411	5.7505	163.601	76.48	187.126	1.65992	114.379
3-70	635.787	8852	3.23356	21.617	4.17809	0.10841	4.38165	0.0169966	1.32	0.301257	108.646	1.42212	104.51	4.35148	11.1616	100.525	108.646	1.42212	973.391
3-71	495.005	7822	2.74034	20.6551	3.85084	0.0980487	3.98881	0.0146882	1.04	0.26073	93.9973	0.97048	94.9735	3.61655	119.581	90.7806	93.9973	0.97048	78.6058
3-72	186.631	7438	4.25311	21.9876	9.32576	0.157193	9.71433	0.0250674	2.72	0.279999	159.603	4.2879	148.243	13.3997	-29.8418	226.483	159.603	4.2879	-534.83
3-73	801.968	3240	1.91566	18.6213	9.55955	0.120406	9.58231	0.0162613	0.660002	0.0688771	103.984	0.68079	115.44	10.4565	358.555	216.188	103.984	0.68079	29.0008
3-74	1718.97	23210	3.76363	20.7429	2.60874	0.0950388	3.68314	0.0142978	2.6	0.705919	91.5169	2.36263	92.1864	3.2458	109.572	61.6032	91.5169	2.36263	83.5225
3-75	418.02	6524	2.65477	21.6587	10.7397	0.0906416	10.8996	0.0142383	1.86	0.170649	91.139	1.68326	88.1009	9.19809	6.54808	259.158	91.139	1.68326	1391.84
3-76	64.564	7006	2.06305	12.6351	2.56809	2.24437	2.93939	0.205672	1.43001	0.4865	1205.72	15.7255	1195.03	20.6496	1175.76	50.8014	1175.76	50.8014	102.548
3-77	418.354	3226	3.54737	22.5676	14.8591	0.0541464	14.9726	0.00886246	1.84	0.122892	56.8794	1.04198	53.5425	7.80914	-93.3422	366.321	56.8794	1.04198	-60.9364
3-78	1172	22764	5.37824	21.2434	2.59177	0.0971441	2.67949	0.0149672	0.68	0.253779	95.7695	0.646419	94.1367	2.409	52.9538	61.8594	95.7695	0.646419	180.855
3-79	926.281	7608	2.46484	21.442	3.60833	0.0701238	3.91931	0.0109051	1.53	0.390375	69.9181	1.06397	68.8169	2.60778	30.7259	86.4951	69.9181	1.06397	227.554
3-80	439.782	12434	0.613883	18.4212	1.51874	0.464154	2.01221	0.0620123	1.32	0.655996	387.852	4.96867	387.143	6.47715	382.885	34.1113	387.852	4.96867	101.297
3-81	264.005	14528	3.79701	17.7954	2.09647	0.542576	3.62723	0.0700271	2.96	0.81605	436.319	12.4877	440.121	12.9551	460.068	46.4975	436.319	12.4877	94.8379
3-82	717.065	6882	4.31747	21.548	4.89621	0.0938678	5.03175	0.0146697	1.16	0.230536	93.8802	1.08112	91.1001	4.38433	18.8965	117.646	93.8802	1.08112	496.811
3-83	184.348	63364	2.69681	8.9829	1.4806	4.78338	2.89694	0.311638	2.49	0.859527	1748.76	38.1381	1781.99	24.3336	1821.1	26.8697	1821.1	26.8697	96.0277
3-84	1108.34	7914	4.31086	20.411	4.69536	0.0951929	6.48285	0.0140918	4.47	0.689512	90.2077	4.0042	92.3293	5.72155	147.522	110.15	90.2077	4.0042	61.1487
3-85	1764.23	9990	4.67357	18.7219	9.25064	0.109402	9.45393	0.0148551	1.95	0.206263	95.0578	1.84003	105.418	9.46655	346.399	209.612	95.0578	1.84003	27.4417
3-86	219.929	5968	2.49775	22.6996	13.1586	0.144013	13.91	0.0237092	4.51	0.324226	151.056	6.73342	136.612	17.7817	-107.668	324.965	151.056	6.73342	-140.298
3-87	1991.55	22374	31.0119	19.237	1.60059	0.254225	2.18678	0.0354694	1.49	0.681368	224.689	3.29019	230.002	4.50069	284.691	36.6053	224.689	3.29019	78.9236
3-88	83.1985	3540	3.30797	24.1937	25.5578	0.200933	25.7075	0.0352576	2.77	0.107751	223.37	6.08139	185.915	43.7008	-266.992	657.831	223.37	6.08139	-83.6617
3-89	217.831	102990	1.62688	5.25828	1.38004	13.0869	2.54639	0.499092	2.14	0.840405	2609.89	45.9295	2685.94	24.0247	2743.67	22.6946	2743.67	22.6946	95.1241
3-90	603.949	17168	3.65416	20.1291	5.66345	0.205192	6.18264	0.0299561	2.48	0.401123	190.273	4.64982	189.51	10.6887	179.993	132.092	190.273	4.64982	105.712
3-91	320.485	3630	3.8295	22.0969	11.8058	0.0902672	12.2692	0.0144664	3.34	0.272227	92.5882	3.07034	87.7523	10.3147	-41.8708	287.68	92.5882	3.07034	-221.128
3-92	132.233	38486	1.53996	8.8135	2.11295	4.5544	3.07205	0.291124	2.23	0.725901	1647.14	32.4143	1740.97	25.5825	1855.58	38.1864	1855.58	38.1864	88.7672
3-93	137.052	7440	3.18204	26.8858	28.6665	0.149383	28.8558	0.0291289	3.3	0.114362	185.094	6.02124	141.367	38.0981	-542.425	782.995	185.094	6.02124	-34.1234
3-94	356.187	4214	3.47607	19.6428	9.60425	0.0952817	13.0736	0.0135741	8.87	0.678468	86.9158	7.6577	92.4116	11.5485	236.706	221.972	86.9158	7.6577	36.7189
3-95	368.337	4498	2.1522	20.7461	12.8724	0.0864731	15.3981	0.0130112	8.45	0.54877	83.3344	6.99644	84.2126	12.4446	109.187	305.032	83.3344	6.99644	76.3225
3-96	2628.3	23464	3.16966	20.4215	3.16019	0.0597706	3.91445	0.00885266	2.31	0.590121	56.8168	1.3067	58.9455	2.2417	146.32	74.1187	56.8168	1.3067	38.8306
3-97	486.833	34876	3.229	18.4171	3.01411	0.399292	4.82677	0.0533348	3.77	0.78106	334.963	12.3056	341.135	13.9861	383.383	67.7453	334.963	12.3056	87.3702
3-98	1244.42	77520	4.15576	20.7873	3.70282	0.0963467	4.18025	0.0145256	1.94	0.464087	92.9645	1.79057	93.3984	3.73012	104.515	87.5657	92.9645	1.79057	88.9485
3-99	680.761	15946	6.94897	22.2909	8.19167	0.0916262	8.27766	0.0148131	1.19	0.14376	94.7909	1.11976	89.0171	7.05489	-63.152	200.128	94.7909	1.11976	-150.1
3-100	268.624	10960	3.76677	18.3912	2.75384	0.376325	3.5944	0.0501964	2.31	0.642666	315.727	7.11758	324.331	9.9796	386.543	61.8457	315.727	7.11758	81.6796
4 - Tyonek Formation (Contact Creek, Susitna basin)
							Isotope ratios						Apparent ages (Ma)
Analysis	U	206Pb	U/Th	206Pb*	±	207Pb*	±	206Pb*	±	error	206Pb*	±	207Pb*	±	206Pb*	±	Best age	±	Conc
	(ppm)	204Pb		207Pb*	(%)	235U*	(%)	238U	(%)	corr.	238U*	(Ma)	235U	(Ma)	207Pb*	(Ma)	(Ma)	(Ma)	(%)
4-1	348	6758	5.3	23.1816	33.6	0.0347	33.8	0.0058	3.3	0.1	37.5	1.2	34.7	11.5	-159.6	856.9	37.5	1.2	NA
4-2	461	8428	4.5	22.3146	11	0.0363	11.1	0.0059	1.9	0.17	37.7	0.7	36.2	4	-65.7	267.9	37.7	0.7	NA
4-3	643	17427	2.4	19.3679	8	0.0632	8.6	0.0089	3	0.35	57	1.7	62.3	5.2	269.1	184.8	57	1.7	NA
4-4	421	13593	3.3	21.5765	10.8	0.0568	11.7	0.0089	4.4	0.38	57.1	2.5	56.1	6.4	15.7	259.7	57.1	2.5	NA
4-5	1934	85086	3.4	21.2784	2.5	0.0602	3.2	0.0093	2.1	0.64	59.6	1.2	59.3	1.9	49	59.7	59.6	1.2	NA
4-6	350	12607	2.6	20.7837	10.9	0.0622	11.5	0.0094	3.8	0.33	60.2	2.3	61.3	6.9	104.9	257.9	60.2	2.3	NA
4-7	992	11985	1.2	18.2788	28.1	0.0718	28.3	0.0095	3.4	0.12	61	2.1	70.4	19.2	400.3	640.6	61	2.1	NA
4-8	376	12839	2	22.4657	14.9	0.0584	15.2	0.0095	3	0.2	61.1	1.8	57.6	8.5	-82.2	367.1	61.1	1.8	NA
4-9	251	6297	1.8	20.9456	10.4	0.065	12.2	0.0099	6.4	0.53	63.4	4	64	7.6	86.6	247.1	63.4	4	NA
4-10	309	5109	1.8	19.0695	16.7	0.0732	17.1	0.0101	4	0.23	64.9	2.6	71.7	11.9	304.6	382.3	64.9	2.6	NA
4-11	617	22025	2.6	22.5179	7.7	0.0623	8.4	0.0102	3.2	0.38	65.3	2.1	61.4	5	-87.9	189.7	65.3	2.1	NA
4-12	1163	52989	6.4	20.5057	4	0.0689	4.3	0.0102	1.5	0.34	65.7	1	67.7	2.8	136.6	94.4	65.7	1	NA
4-13	1720	12368	1.6	20.4849	3.7	0.0691	4.3	0.0103	2.1	0.5	65.8	1.4	67.8	2.8	139	86.8	65.8	1.4	NA
4-14	865	25783	1.9	21.0269	8.2	0.0675	8.6	0.0103	2.5	0.29	66	1.7	66.3	5.5	77.3	195.9	66	1.7	NA
4-15	439	22709	3	22.1036	9.3	0.0644	10	0.0103	3.6	0.36	66.2	2.4	63.3	6.2	-42.6	227.6	66.2	2.4	NA
4-16	837	31683	1.3	20.6205	5.4	0.0691	6.3	0.0103	3.3	0.52	66.2	2.2	67.8	4.1	123.5	126.7	66.2	2.2	NA
4-17	711	24921	2.3	20.8833	6.6	0.0683	6.9	0.0103	2.2	0.32	66.3	1.5	67.1	4.5	93.6	155.5	66.3	1.5	NA
4-18	768	14132	2.2	21.5921	8	0.0662	8.6	0.0104	3.3	0.38	66.5	2.2	65.1	5.4	13.9	192.2	66.5	2.2	NA
4-19	1139	29983	2.8	21.2276	3.8	0.0678	5	0.0104	3.3	0.65	67	2.2	66.7	3.2	54.7	90.5	67	2.2	NA
4-20	178	4262	3.5	17.9133	18.4	0.0822	19.8	0.0107	7.3	0.37	68.5	5	80.2	15.2	445.4	411.7	68.5	5	NA
4-21	506	12710	3.9	22.6846	12.1	0.0656	12.3	0.0108	2	0.16	69.2	1.4	64.5	7.7	-106	299	69.2	1.4	NA
4-22	423	19292	10.1	21.3199	7.1	0.0716	8	0.0111	3.7	0.46	70.9	2.6	70.2	5.4	44.4	168.8	70.9	2.6	NA
4-23	484	1086	0.5	19.6638	10	0.0798	10.4	0.0114	2.8	0.27	73	2	78	7.8	234.3	232.3	73	2	NA
4-24	328	14742	1.6	21.7783	13	0.0759	13.3	0.012	2.7	0.2	76.8	2	74.3	9.5	-6.7	314.7	76.8	2	NA
4-25	1855	2737	1.4	19.3068	7.7	0.0868	11.6	0.0122	8.8	0.75	77.9	6.8	84.5	9.4	276.4	175.5	77.9	6.8	NA
4-26	202	15453	1.6	20.5693	12.3	0.0837	12.8	0.0125	3.3	0.26	80	2.6	81.6	10	129.4	290.6	80	2.6	NA
4-27	3828	128921	13.1	20.8045	1.3	0.0855	5.5	0.0129	5.4	0.97	82.6	4.4	83.3	4.4	102.6	30.8	82.6	4.4	NA
4-28	531	15198	1.5	19.9098	4	0.0972	4.4	0.014	1.8	0.4	89.9	1.6	94.2	4	205.5	93.3	89.9	1.6	NA
4-29	176	6227	1.3	25.5202	19.5	0.0807	19.8	0.0149	3.6	0.18	95.6	3.5	78.8	15	-404.4	512.9	95.6	3.5	NA
4-30	2301	150767	1.2	20.921	1.8	0.0991	2.5	0.015	1.7	0.7	96.2	1.7	95.9	2.3	89.3	41.7	96.2	1.7	NA
4-31	665	36114	2.4	21.3946	4.1	0.0977	5.3	0.0152	3.4	0.64	97	3.3	94.7	4.8	36	98	97	3.3	NA
4-32	925	49420	2.8	20.3764	3.4	0.1043	4.1	0.0154	2.3	0.55	98.6	2.2	100.7	3.9	151.5	79.9	98.6	2.2	NA
4-33	696	26750	3.3	20.7775	4	0.1027	4.6	0.0155	2.3	0.49	99	2.2	99.3	4.4	105.6	95	99	2.2	NA
4-34	530	18315	3	21.1184	5.5	0.1011	5.9	0.0155	2.1	0.36	99	2.1	97.8	5.5	67	131.5	99	2.1	NA
4-35	431	19542	1.5	19.9255	5.1	0.1073	6	0.0155	3.1	0.52	99.2	3	103.5	5.9	203.6	118.9	99.2	3	NA
4-36	650	26728	1.9	20.9419	2.8	0.1028	3.5	0.0156	2	0.58	99.9	2	99.4	3.3	87	67.1	99.9	2	NA
4-37	301	9082	3.2	18.025	13.5	0.1201	14.4	0.0157	5.1	0.35	100.4	5.1	115.1	15.7	431.5	302.3	100.4	5.1	NA
4-38	441	22982	2.2	20.9683	7.5	0.1034	7.7	0.0157	1.5	0.2	100.5	1.5	99.9	7.3	83.9	178.6	100.5	1.5	NA
4-39	348	29706	1.3	21.9861	10.9	0.0993	11	0.0158	1.3	0.12	101.3	1.3	96.1	10.1	-29.7	265.6	101.3	1.3	NA
4-40	427	11753	2.3	21.3445	9	0.1029	9.6	0.0159	3.5	0.36	101.8	3.5	99.4	9.1	41.6	215.5	101.8	3.5	NA
4-41	1220	44594	1.2	20.8038	2.1	0.1063	2.8	0.016	1.8	0.65	102.6	1.8	102.6	2.7	102.6	50.3	102.6	1.8	NA
4-42	495	11805	2.3	21.1228	4.3	0.1049	5.8	0.0161	3.9	0.68	102.8	4	101.3	5.6	66.5	101.6	102.8	4	NA
4-43	247	8620	2.3	22.522	10.5	0.0992	10.8	0.0162	2.4	0.23	103.6	2.5	96	9.9	-88.4	257.4	103.6	2.5	NA
4-44	372	42539	2.3	20.6496	3.4	0.1085	4.5	0.0162	2.9	0.66	103.9	3	104.6	4.4	120.2	79.3	103.9	3	NA
4-45	245	21531	3.4	19.5479	13	0.1152	13.5	0.0163	3.8	0.28	104.4	3.9	110.7	14.2	247.9	300	104.4	3.9	NA
4-46	829	21097	1.8	20.4211	2.5	0.1125	2.9	0.0167	1.6	0.55	106.5	1.7	108.3	3	146.4	57.6	106.5	1.7	NA
4-47	521	45928	1.8	20.8895	6.4	0.1107	6.8	0.0168	2.4	0.35	107.3	2.5	106.6	6.9	92.9	151.5	107.3	2.5	NA
4-48	314	3685	2.3	19.8577	15.9	0.1167	16.6	0.0168	4.7	0.28	107.4	5	112.1	17.6	211.5	370.6	107.4	5	NA
4-49	532	23899	1.2	20.1918	5.1	0.1156	5.5	0.0169	2.1	0.38	108.2	2.2	111	5.8	172.7	118.9	108.2	2.2	NA
4-50	359	24824	1.4	20.6607	5.6	0.113	6.1	0.0169	2.5	0.41	108.2	2.7	108.7	6.3	118.9	131.2	108.2	2.7	NA
4-51	632	24427	2	20.8746	2.1	0.113	2.9	0.0171	2	0.7	109.3	2.2	108.7	3	94.6	48.8	109.3	2.2	NA
4-52	700	2600	2.5	18.8091	9.8	0.1266	10.2	0.0173	2.8	0.28	110.4	3.1	121.1	11.6	335.9	222	110.4	3.1	NA
4-53	1305	185731	1.3	20.6614	1.8	0.1155	3.4	0.0173	2.9	0.86	110.6	3.2	111	3.6	118.8	41.3	110.6	3.2	NA
4-54	942	48182	1.8	20.557	2.9	0.1266	3.5	0.0189	2	0.56	120.5	2.4	121	4	130.8	68.6	120.5	2.4	NA
4-55	169	13425	2.7	20.3648	13.4	0.1595	13.6	0.0236	2.4	0.18	150.1	3.5	150.2	18.9	152.8	314	150.1	3.5	NA
4-56	119	12174	2.7	21.7017	13.2	0.1727	13.6	0.0272	3.5	0.26	172.9	6.1	161.8	20.4	1.8	318.4	172.9	6.1	NA
4-57	371	35541	2.1	20.193	4.4	0.1913	5	0.028	2.4	0.48	178.1	4.3	177.7	8.2	172.6	102.8	178.1	4.3	NA
4-58	451	45240	2	19.8145	4	0.1991	5	0.0286	3	0.61	181.9	5.4	184.4	8.4	216.6	92.2	181.9	5.4	NA
4-59	388	15977	1.9	19.6486	4.9	0.2011	5.2	0.0287	1.7	0.33	182.1	3	186	8.8	236	112.9	182.1	3	NA
4-60	179	28339	1.7	20.0329	7.1	0.1983	7.8	0.0288	3.2	0.41	183.1	5.8	183.7	13.2	191.2	166.3	183.1	5.8	NA
4-61	818	3964	1.4	18.5447	9.1	0.2167	9.5	0.0291	2.8	0.29	185.2	5.1	199.2	17.1	367.8	204.5	185.2	5.1	NA
4-62	383	26027	2.1	19.5746	3.6	0.2111	4.1	0.03	2.1	0.5	190.4	3.9	194.5	7.3	244.7	82.5	190.4	3.9	NA
4-63	160	14741	3.2	19.752	7.8	0.2223	9	0.0318	4.3	0.48	202.1	8.6	203.8	16.5	223.9	181.6	202.1	8.6	NA
4-64	469	71605	2.8	19.4291	3.2	0.2267	4.1	0.0319	2.5	0.62	202.7	5.1	207.5	7.7	261.9	74.6	202.7	5.1	NA
4-65	302	29356	2.4	19.6828	4.8	0.2283	5.5	0.0326	2.8	0.51	206.8	5.8	208.8	10.5	232	109.8	206.8	5.8	NA
4-66	334	25313	2.2	19.3933	3.1	0.2968	3.8	0.0417	2.2	0.58	263.6	5.8	263.9	8.9	266.1	71.5	263.6	5.8	NA
4-67	309	2592	1.6	17.6087	10.5	0.3667	10.8	0.0468	2.6	0.24	295	7.4	317.2	29.5	483.4	232.5	295	7.4	NA
4-68	901	119583	2	18.7126	0.9	0.3565	4	0.0484	3.9	0.97	304.6	11.7	309.6	10.8	347.5	21.2	304.6	11.7	NA
4-69	155	32856	2	18.6367	3.9	0.3921	4.8	0.053	2.8	0.59	332.9	9.1	335.9	13.7	356.7	87.6	332.9	9.1	NA
4-70	255	43669	1.3	18.3374	2.6	0.3991	3.7	0.0531	2.6	0.72	333.4	8.6	341	10.7	393.1	57.5	333.4	8.6	NA
4-71	734	117372	3.9	18.6092	0.9	0.412	2.6	0.0556	2.5	0.94	348.9	8.3	350.3	7.7	360	19.7	348.9	8.3	NA
4-72	260	54402	2.6	18.1804	3.5	0.4233	4.7	0.0558	3.2	0.68	350.1	11	358.4	14.3	412.4	77.7	350.1	11	NA
4-73	230	42634	1.8	18.5688	1.8	0.4198	2.9	0.0565	2.2	0.77	354.5	7.7	355.9	8.6	364.9	41	354.5	7.7	NA
4-74	550	30517	1.1	18.3885	1.7	0.4253	3.1	0.0567	2.6	0.84	355.6	9	359.8	9.3	386.9	37.2	355.6	9	NA
4-75	489	20202	1.6	18.2426	3.7	0.4307	4.3	0.057	2.3	0.52	357.2	7.8	363.6	13.2	404.7	82.3	357.2	7.8	NA
4-76	842	140090	2.7	18.602	1.3	0.4311	2.2	0.0582	1.7	0.8	364.4	6.1	364	6.6	360.9	29.2	364.4	6.1	NA
4-77	424	70289	2	18.6416	1.3	0.4317	2.4	0.0584	2	0.84	365.7	7.2	364.4	7.4	356.1	29.7	365.7	7.2	NA
4-78	473	116193	1.7	18.5119	2	0.4359	4.1	0.0585	3.5	0.87	366.7	12.6	367.4	12.6	371.8	45.4	366.7	12.6	NA
4-79	289	48407	2.8	18.6797	3.3	0.4325	4.2	0.0586	2.5	0.6	367	8.9	364.9	12.7	351.5	75	367	8.9	NA
4-80	503	84480	1.6	18.7454	1.2	0.4389	3.1	0.0597	2.8	0.91	373.6	10.2	369.4	9.5	343.5	28.2	373.6	10.2	NA
4-81	122	155918	2.2	11.5844	1	2.7745	2.9	0.2331	2.7	0.94	1350.8	32.6	1348.7	21.3	1345.4	19.3	1345.4	19.3	100.4
4-82	105	53655	1.6	9.8652	0.9	4.0693	4.2	0.2912	4.1	0.98	1647.3	60	1648.2	34.5	1649.3	17	1649.3	17	99.9
4-83	164	140331	1.2	9.1378	0.3	4.4582	4.2	0.2955	4.2	1	1668.8	61.7	1723.2	34.9	1790	4.9	1790	4.9	93.2
4-84	384	37514	1.5	8.6665	0.2	4.5946	3.3	0.2888	3.3	1	1635.5	47.2	1748.3	27.3	1885.9	3.2	1885.9	3.2	86.7
4-85	96	2228	2.1	8.5712	3.5	5.4578	4.7	0.3393	3.2	0.67	1883.2	51.8	1894	40.4	1905.8	62.4	1905.8	62.4	98.8
4-86	99	122115	1.3	8.5372	0.6	5.4816	1.7	0.3394	1.6	0.94	1883.8	25.9	1897.7	14.5	1912.9	10.3	1912.9	10.3	98.5
4-87	41	40936	1.2	8.49	0.8	5.6315	2.2	0.3468	2	0.93	1919.1	34	1920.9	19.1	1922.9	15.1	1922.9	15.1	99.8
4-88	124	148594	0.5	8.3841	0.3	5.9603	2.6	0.3624	2.6	0.99	1993.7	44.3	1970.1	22.7	1945.4	6.3	1945.4	6.3	102.5
4-89	192	179596	0.9	8.2151	0.3	5.3632	3.4	0.3196	3.4	1	1787.5	53.4	1879	29.4	1981.7	5.1	1981.7	5.1	90.2
4-90	145	150083	1.1	8.1063	0.5	6.2143	1.8	0.3654	1.7	0.96	2007.5	29.2	2006.5	15.5	2005.4	8.9	2005.4	8.9	100.1
4-91	93	214121	2.2	6.7824	0.3	8.5969	2.1	0.4229	2	0.99	2273.6	39	2296.2	18.7	2316.4	4.8	2316.4	4.8	98.2
4-92	327	517782	2.8	6.4636	0.3	8.0526	3	0.3775	3	0.99	2064.6	52.9	2236.9	27.2	2398.7	5.3	2398.7	5.3	86.1
4-93	34	36468	1.4	6.3265	0.8	9.6989	3.8	0.445	3.7	0.98	2373.1	73.6	2406.6	34.8	2435.1	12.8	2435.1	12.8	97.5
4-94	166	145665	1.7	5.9537	0.5	10.8687	5.9	0.4693	5.9	1	2480.5	121.1	2512	54.9	2537.4	8.1	2537.4	8.1	97.8
4-95	85	87533	1.5	5.5227	0.3	12.9041	2.8	0.5169	2.7	0.99	2685.9	60.2	2672.7	26	2662.7	5.7	2662.7	5.7	100.9
5 - West Foreland Formation (Theodore River, Capps Glacier area)
							Isotope ratios						Apparent ages (Ma)
Analysis	U	206Pb	U/Th	206Pb*	±	207Pb*	±	206Pb*	±	error	206Pb*	±	207Pb*	±	206Pb*	±	Best age	±	Conc
	(ppm)	204Pb		207Pb*	(%)	235U*	(%)	238U	(%)	corr.	238U*	(Ma)	235U	(Ma)	207Pb*	(Ma)	(Ma)	(Ma)	(%)
5-1	994	6000	3.1	18.3517	16.3	0.0626	16.3	0.0083	0.7	0.04	53.5	0.4	61.6	9.7	391.4	367.4	53.5	0.4	13.7
5-2	725	1887	3.4	16.744	8.9	0.0696	9	0.0085	1.4	0.16	54.3	0.8	68.3	5.9	593.6	192.3	54.3	0.8	9.1
5-3	1757	8805	3.6	20.5521	6.3	0.0588	6.4	0.0088	0.5	0.08	56.3	0.3	58.1	3.6	131.4	149.1	56.3	0.3	42.9
5-4	541	2037	4.1	15.2963	22.9	0.0816	23.2	0.009	3.6	0.15	58.1	2.1	79.6	17.8	786.4	487.6	58.1	2.1	7.4
5-5	363	4206	4.1	23.2587	11.1	0.0543	11.3	0.0092	2.3	0.2	58.7	1.3	53.7	5.9	-167.9	276.9	58.7	1.3	-35
5-6	351	4125	6.9	24.6764	16.5	0.0545	16.6	0.0098	1.9	0.11	62.6	1.2	53.9	8.7	-317.4	425.9	62.6	1.2	-19.7
5-7	363	5238	3.1	22.1883	15.9	0.0609	16	0.0098	0.7	0.04	62.9	0.4	60	9.3	-51.9	390.3	62.9	0.4	-121.1
5-8	661	12804	5.7	22.7188	7.9	0.0609	7.9	0.01	1.2	0.16	64.3	0.8	60	4.6	-109.8	193.5	64.3	0.8	-58.6
5-9	877	7122	1.2	20.5741	8.9	0.0674	9.2	0.0101	2.4	0.26	64.5	1.5	66.2	5.9	128.8	210.3	64.5	1.5	50.1
5-10	549	6162	3.2	20.2024	7	0.0693	7.1	0.0102	1.1	0.15	65.1	0.7	68.1	4.7	171.5	163.2	65.1	0.7	38
5-11	1750	15963	7.6	21.3378	3.2	0.0668	3.5	0.0103	1.5	0.42	66.3	1	65.6	2.2	42.4	76.4	66.3	1	156.4
5-12	1866	21252	1.4	21.2527	1.6	0.0676	2	0.0104	1.1	0.56	66.8	0.7	66.4	1.3	51.9	39.1	66.8	0.7	128.7
5-13	295	3981	5.7	21.0861	18.9	0.0694	18.9	0.0106	1	0.05	68	0.7	68.1	12.5	70.6	453.3	68	0.7	96.3
5-14	306	3657	2.7	21.4638	13.6	0.0683	14	0.0106	3.3	0.24	68.1	2.3	67.1	9.1	28.3	328.3	68.1	2.3	241.2
5-15	228	2625	3.6	25.5601	30.3	0.0599	30.4	0.0111	2.2	0.07	71.2	1.6	59.1	17.5	-408.5	807.1	71.2	1.6	-17.4
5-16	397	5088	18.5	22.3974	9.7	0.0695	10.1	0.0113	2.9	0.29	72.4	2.1	68.2	6.7	-74.8	236.5	72.4	2.1	-96.7
5-17	701	11766	6.8	20.4827	5.7	0.081	5.9	0.012	1.6	0.26	77.1	1.2	79.1	4.5	139.3	133	77.1	1.2	55.4
5-18	190	2373	1.3	25.4682	19.6	0.0706	20	0.013	3.7	0.18	83.5	3	69.2	13.4	-399.1	515.5	83.5	3	-20.9
5-19	1520	26271	1.9	20.8202	2.6	0.094	3.3	0.0142	1.9	0.59	90.8	1.7	91.2	2.8	100.8	62.4	90.8	1.7	90.1
5-20	552	7758	1.4	20.1918	6.4	0.0992	6.8	0.0145	2.3	0.34	93	2.1	96.1	6.3	172.7	150.1	93	2.1	53.8
5-21	670	7050	2	20.9533	6.1	0.0966	6.4	0.0147	1.8	0.28	94	1.7	93.6	5.7	85.7	145.5	94	1.7	109.6
5-22	2599	11940	3.5	20.6998	3.4	0.0985	4.1	0.0148	2.2	0.55	94.6	2.1	95.4	3.7	114.5	80.5	94.6	2.1	82.6
5-23	825	14253	4.3	21.2045	3	0.0965	3.2	0.0148	1.2	0.36	95	1.1	93.5	2.9	57.3	71.3	95	1.1	165.7
5-24	747	10032	3.3	20.3695	4.1	0.1008	4.5	0.0149	1.8	0.41	95.3	1.7	97.5	4.2	152.3	95.6	95.3	1.7	62.6
5-25	492	7461	2.7	20.5669	8.9	0.1003	9.3	0.015	2.7	0.29	95.7	2.6	97	8.6	129.6	210.9	95.7	2.6	73.8
5-26	229	3648	3.2	21.5042	13.4	0.0959	13.6	0.015	1.9	0.14	95.7	1.8	93	12.1	23.7	323.5	95.7	1.8	403.2
5-27	1073	14046	2.4	19.4457	7.3	0.1075	7.8	0.0152	2.9	0.36	97	2.8	103.7	7.7	259.9	167.8	97	2.8	37.3
5-28	1260	13323	2.5	20.5925	2.6	0.1017	2.6	0.0152	0.5	0.19	97.2	0.5	98.4	2.5	126.7	60.7	97.2	0.5	76.7
5-29	419	7827	3	21.5302	6.8	0.0996	7.1	0.0156	2	0.28	99.5	1.9	96.4	6.5	20.8	164.4	99.5	1.9	477.4
5-30	1430	13833	1.9	20.0711	5.1	0.107	5.2	0.0156	0.8	0.15	99.7	0.8	103.2	5.1	186.7	119.3	99.7	0.8	53.4
5-31	506	8427	2.5	22.3351	7	0.0963	7.1	0.0156	1.3	0.18	99.8	1.3	93.4	6.4	-68	171.5	99.8	1.3	-146.8
5-32	1168	14631	1.7	20.9852	5.8	0.1031	6.4	0.0157	2.6	0.41	100.3	2.6	99.6	6.1	82	138.4	100.3	2.6	122.3
5-33	568	7983	4.3	20.0852	8.2	0.109	8.3	0.0159	1.2	0.15	101.6	1.2	105.1	8.2	185.1	190.4	101.6	1.2	54.9
5-34	1539	22152	1.7	20.9943	1.3	0.1043	2.1	0.0159	1.7	0.79	101.6	1.7	100.8	2	81	31.1	101.6	1.7	125.4
5-35	567	7845	3.8	20.7552	7.4	0.1057	7.5	0.0159	1.4	0.19	101.8	1.4	102	7.3	108.1	174.7	101.8	1.4	94.1
5-36	314	3480	2.3	20.0083	13.7	0.1104	13.9	0.016	2.4	0.17	102.5	2.4	106.3	14	194	319.1	102.5	2.4	52.8
5-37	848	12075	2.6	20.2221	14.3	0.1094	14.3	0.016	0.8	0.06	102.6	0.8	105.4	14.4	169.2	335.7	102.6	0.8	60.6
5-38	123	2721	5.6	23.6359	16.7	0.0951	17	0.0163	2.9	0.17	104.2	3	92.2	15	-208.1	421.9	104.2	3	-50.1
5-39	1038	5190	3.8	20.0274	2.1	0.1124	2.4	0.0163	1	0.42	104.4	1	108.2	2.4	191.8	49.7	104.4	1	54.4
5-40	382	3543	2.6	20.486	9	0.11	9.1	0.0163	1.7	0.19	104.5	1.8	106	9.2	138.9	210.9	104.5	1.8	75.3
5-41	1161	10263	2.5	19.187	6.4	0.1236	6.6	0.0172	1.6	0.25	110	1.8	118.4	7.4	290.6	147.1	110	1.8	37.8
5-42	271	7035	1.8	21.4812	7.2	0.1897	7.3	0.0296	0.9	0.12	187.8	1.7	176.4	11.8	26.3	173.8	187.8	1.7	712.9
5-43	176	4146	1.4	19.4133	11.4	0.2106	12.1	0.0296	4.3	0.35	188.3	7.9	194	21.4	263.8	261.4	188.3	7.9	71.4
5-44	237	7950	3.8	20.8768	4.8	0.2011	5.3	0.0305	2.1	0.41	193.4	4.1	186.1	8.9	94.3	113.9	193.4	4.1	205
5-45	526	15831	4.3	19.7782	3.4	0.2173	3.5	0.0312	0.7	0.19	197.8	1.3	199.6	6.3	220.9	78.5	197.8	1.3	89.6
5-46	545	4173	4.5	17.5482	3.5	0.3358	3.6	0.0427	1.1	0.29	269.8	2.8	294	9.3	491	76.6	269.8	2.8	55
5-47	370	12309	2.7	18.8818	1.3	0.3576	2.7	0.049	2.4	0.88	308.2	7.2	310.4	7.3	327.1	29.9	308.2	7.2	94.2
5-48	156	7647	2.6	19.5199	5.2	0.3869	5.2	0.0548	0.5	0.1	343.8	1.7	332.1	14.7	251.2	119.3	343.8	1.7	136.9
5-49	149	5145	2.4	17.8532	3.3	0.4231	3.4	0.0548	1	0.3	343.8	3.4	358.3	10.3	452.8	72.6	343.8	3.4	75.9
5-50	794	31026	1.4	18.7616	1.3	0.4031	1.4	0.0548	0.5	0.37	344.2	1.7	343.9	4	341.6	28.6	344.2	1.7	100.8
5-51	274	14019	3	19.0287	2.8	0.4014	2.9	0.0554	0.7	0.22	347.6	2.2	342.7	8.4	309.5	64.1	347.6	2.2	112.3
5-52	469	6234	2.6	15.8942	7.4	0.4838	7.7	0.0558	2	0.26	349.8	6.7	400.6	25.3	705.4	157.5	349.8	6.7	49.6
5-53	589	17604	3	18.4956	2.8	0.4169	3.2	0.0559	1.6	0.49	350.8	5.4	353.8	9.6	373.8	62.7	350.8	5.4	93.8
5-54	326	14934	3.2	18.5632	3.6	0.4252	4.2	0.0572	2.1	0.5	358.9	7.3	359.8	12.7	365.6	82.2	358.9	7.3	98.2
5-55	472	25341	3.4	18.6625	2.2	0.4249	2.4	0.0575	1	0.42	360.5	3.6	359.6	7.4	353.6	50.1	360.5	3.6	102
5-56	1086	30411	2.4	18.0268	3.2	0.4411	3.3	0.0577	0.8	0.24	361.4	2.7	371	10.2	431.3	71.2	361.4	2.7	83.8
5-57	644	34251	9.1	18.3894	3	0.4366	3.1	0.0582	0.8	0.26	364.8	2.9	367.8	9.5	386.8	66.5	364.8	2.9	94.3
5-58	370	30426	1.9	18.7991	3	0.4286	3	0.0584	0.5	0.16	366.1	1.8	362.1	9.3	337.1	68	366.1	1.8	108.6
5-59	141	8238	2.1	18.559	4.4	0.4359	4.6	0.0587	1.3	0.28	367.5	4.6	367.3	14.3	366.1	100.1	367.5	4.6	100.4
5-60	545	22542	2.7	18.5794	7.2	0.4367	7.9	0.0588	3.3	0.42	368.6	11.8	367.9	24.3	363.6	161.5	368.6	11.8	101.4
5-61	108	10356	3.7	18.5364	7.9	0.5111	7.9	0.0687	1	0.12	428.4	4	419.2	27.2	368.9	177.1	428.4	4	116.1
5-62	121	5160	1	16.3521	3.9	0.767	4.3	0.091	1.9	0.43	561.2	10.1	578.1	19.1	644.7	83.9	561.2	10.1	87.1
5-63	639	44247	2	15.8185	1.9	0.9622	3.2	0.1104	2.5	0.8	675	16.3	684.4	15.8	715.5	40.4	675	16.3	94.3
5-64	138	20517	6	12.7101	2.6	2.0265	2.7	0.1868	0.7	0.25	1104.1	7	1124.5	18.6	1164	52.4	1164	52.4	94.9
5-65	177	39831	3	11.5984	1.5	2.7566	2.4	0.2319	1.8	0.76	1344.4	21.7	1343.9	17.5	1343.1	29.6	1343.1	29.6	100.1
5-66	297	26715	2.3	11.2585	3.9	2.8812	4	0.2353	1.1	0.27	1362	13.6	1377	30.5	1400.3	74.6	1400.3	74.6	97.3
5-67	282	88254	3.2	9.8251	1.5	4.092	2.6	0.2916	2.2	0.83	1649.5	31.3	1652.7	21.3	1656.8	27.2	1656.8	27.2	99.6
5-68	332	77169	2.6	9.2731	1.7	4.7314	2.5	0.3182	1.9	0.73	1781	28.9	1772.8	21.3	1763.2	31.6	1763.2	31.6	101
5-69	436	39717	4.7	9.1783	1.5	4.672	1.6	0.311	0.7	0.41	1745.7	9.9	1762.2	13.4	1782	26.6	1782	26.6	98
5-70	157	51855	2.3	9.154	1.1	4.8232	2.3	0.3202	2	0.87	1790.8	30.8	1789	19	1786.8	20.2	1786.8	20.2	100.2
5-71	229	47391	0.9	9.0913	2	4.3063	2.5	0.2839	1.4	0.56	1611.2	19.7	1694.6	20.2	1799.3	36.9	1799.3	36.9	89.5
5-72	170	42699	1.9	9.0668	1.7	4.7153	2	0.3101	1.2	0.59	1741.1	18.3	1770	17.2	1804.2	30.2	1804.2	30.2	96.5
5-73	217	79716	2.2	9.0063	1.7	4.7999	1.9	0.3135	0.8	0.44	1758	12.9	1784.9	15.9	1816.4	30.9	1816.4	30.9	96.8
5-74	178	44457	1	8.9401	3.5	4.3884	3.7	0.2845	1.3	0.33	1614.2	17.8	1710.2	30.9	1829.8	63.8	1829.8	63.8	88.2
5-75	122	37362	1.3	8.9205	1.3	4.9523	2.3	0.3204	1.8	0.82	1791.7	28.8	1811.2	19	1833.7	23.6	1833.7	23.6	97.7
5-76	345	24429	3.1	8.919	1.7	3.936	1.8	0.2546	0.6	0.34	1462.2	8.2	1621.1	14.9	1834.1	31.3	1834.1	31.3	79.7
5-77	245	23244	3.8	8.8555	3.2	5.1473	4.8	0.3306	3.5	0.74	1841.2	56.7	1844	40.8	1847	58.4	1847	58.4	99.7
5-78	98	27489	1	8.8552	1.3	5.2034	1.4	0.3342	0.5	0.35	1858.6	8.1	1853.2	12	1847.1	23.9	1847.1	23.9	100.6
5-79	149	48396	3.2	8.7826	2	5.1528	2.2	0.3282	0.9	0.4	1829.8	14.2	1844.9	18.8	1861.9	36.5	1861.9	36.5	98.3
5-80	891	2184	2.3	8.7772	8.1	1.1209	10	0.0714	6	0.6	444.3	25.8	763.4	53.9	1863	145.6	1863	145.6	23.8
5-81	134	33168	1.2	8.7395	1.4	5.1246	1.8	0.3248	1.1	0.63	1813.2	17.7	1840.2	15.2	1870.8	25.1	1870.8	25.1	96.9
5-82	239	48882	2.1	8.6991	1.4	5.2863	1.5	0.3335	0.7	0.43	1855.4	10.6	1866.6	13.2	1879.2	25.2	1879.2	25.2	98.7
5-83	174	44628	1.9	8.6644	3.4	4.7338	6.7	0.2975	5.8	0.86	1678.8	85.7	1773.2	56.3	1886.4	60.9	1886.4	60.9	89
5-84	145	45894	4.5	8.6296	0.5	5.4514	2.2	0.3412	2.2	0.97	1892.4	35.8	1893	19.2	1893.6	9	1893.6	9	99.9
5-85	429	71520	1.6	8.4752	1	5.5886	1.8	0.3435	1.5	0.83	1903.6	24.4	1914.3	15.4	1926	17.9	1926	17.9	98.8
5-86	111	23790	1.6	8.3715	3.2	5.5726	3.5	0.3383	1.5	0.42	1878.7	24.4	1911.9	30.5	1948	57.4	1948	57.4	96.4
5-87	454	70389	2.4	8.256	1.3	5.7409	2.4	0.3438	2	0.84	1904.7	33	1937.6	20.7	1972.8	23.3	1972.8	23.3	96.5
5-88	440	64209	0.8	8.1859	1.6	5.4235	2.4	0.322	1.8	0.75	1799.4	28.9	1888.6	21	1988	28.6	1988	28.6	90.5
5-89	129	33135	2.6	8.1081	3.5	5.8519	3.6	0.3441	0.5	0.15	1906.5	8.7	1954.1	31	2005	62.7	2005	62.7	95.1
5-90	384	87639	3.4	8.0621	1.3	6.1878	3	0.3618	2.8	0.91	1990.7	47.3	2002.7	26.5	2015.1	22.2	2015.1	22.2	98.8
5-91	134	52413	3.6	7.7265	1.7	6.7475	2.1	0.3781	1.3	0.61	2067.5	23	2078.9	18.7	2090.2	29.4	2090.2	29.4	98.9
5-92	264	95211	3	6.6156	1	9.2536	2	0.444	1.8	0.86	2368.5	34.7	2363.4	18.7	2359.1	17.8	2359.1	17.8	100.4
5-93	471	67134	3	6.3943	12.1	8.5903	12.7	0.3984	3.8	0.3	2161.6	69.4	2295.5	116.1	2417	206.7	2417	206.7	89.4
5-94	109	52593	2.4	6.0961	1.4	10.5842	1.6	0.468	0.8	0.48	2474.6	15.8	2487.3	15	2497.7	23.9	2497.7	23.9	99.1
5-95	427	69135	2.7	6.0669	3.6	10.1013	3.9	0.4445	1.5	0.37	2370.6	29.2	2444.1	36.3	2505.8	61.3	2505.8	61.3	94.6
5-96	115	48348	1.2	5.8818	2.4	11.3695	2.6	0.485	1.2	0.45	2549	24.8	2553.9	24.5	2557.8	39.3	2557.8	39.3	99.7
5-97	57	19713	0.9	5.5605	1.4	12.2206	1.6	0.4928	0.8	0.5	2583	16.8	2621.5	14.7	2651.4	22.4	2651.4	22.4	97.4
6 - West Foreland Formation (South side of Capps Glacier)
							Isotope ratios						Apparent ages (Ma)
Analysis	U	206Pb	U/Th	206Pb*	±	207Pb*	±	206Pb*	±	error	206Pb*	±	207Pb*	±	206Pb*	±	Best age	±	Conc
	(ppm)	204Pb		207Pb*	(%)	235U*	(%)	238U	(%)	corr.	238U*	(Ma)	235U	(Ma)	207Pb*	(Ma)	(Ma)	(Ma)	(%)
6-1	172	825	2.4	18.3294	37.1	0.0518	37.2	0.0069	1.8	0.05	44.2	0.8	51.3	18.6	394.1	860.2	44.2	0.8	11.2
6-2	471	2073	0.9	21.0346	27	0.0471	27.1	0.0072	0.9	0.03	46.2	0.4	46.7	12.4	76.5	653	46.2	0.4	60.4
6-3	342	2499	2.6	20.7667	17.6	0.0576	17.9	0.0087	3.5	0.2	55.7	2	56.9	9.9	106.9	417.9	55.7	2	52.1
6-4	283	2982	4	22.5566	11.4	0.0539	11.5	0.0088	1.6	0.14	56.6	0.9	53.3	6	-92.1	280.2	56.6	0.9	-61.4
6-5	576	2364	2.6	14.9361	18.4	0.0814	18.5	0.0088	1.7	0.09	56.6	1	79.5	14.1	836.3	386.7	56.6	1	6.8
6-6	299	2118	2.1	22.3794	14.9	0.0546	14.9	0.0089	0.6	0.04	56.9	0.3	54	7.8	-72.8	365.1	56.9	0.3	-78.1
6-7	408	3777	2.9	22.1882	10.6	0.0557	10.6	0.009	0.8	0.08	57.6	0.5	55.1	5.7	-51.9	257.8	57.6	0.5	-110.9
6-8	352	2523	2.8	20.6708	11.7	0.0601	11.8	0.009	0.7	0.06	57.9	0.4	59.3	6.8	117.8	277.7	57.9	0.4	49.1
6-9	207	2055	4.2	27.2512	35.5	0.0457	35.7	0.009	3.8	0.11	57.9	2.2	45.3	15.8	-578.8	986.3	57.9	2.2	-10
6-10	465	2100	3.9	17.0419	5.4	0.073	5.5	0.009	1.1	0.2	57.9	0.6	71.6	3.8	555.2	118.1	57.9	0.6	10.4
6-11	348	2493	4.2	18.9305	16	0.0659	16.5	0.009	4.1	0.25	58	2.4	64.8	10.4	321.3	365.2	58	2.4	18.1
6-12	814	4998	2.7	21.6082	6.6	0.0577	6.8	0.009	1.5	0.23	58.1	0.9	57	3.8	12.2	158.7	58.1	0.9	477.9
6-13	556	5133	3.1	21.8564	7.7	0.0571	7.8	0.0091	1.3	0.16	58.1	0.7	56.4	4.3	-15.4	186.4	58.1	0.7	-378.7
6-14	127	1557	9.5	19.5164	8	0.0641	10	0.0091	6	0.6	58.2	3.5	63	6.1	251.6	183.8	58.2	3.5	23.1
6-15	539	4302	3.4	21.6332	24.1	0.0578	24.1	0.0091	1.5	0.06	58.2	0.9	57.1	13.4	9.4	587	58.2	0.9	622
6-16	599	4092	4.4	21.8676	8.4	0.0572	8.4	0.0091	0.6	0.07	58.3	0.3	56.5	4.6	-16.6	203.3	58.3	0.3	-351.1
6-17	510	6003	4.6	21.6607	9.3	0.0578	9.3	0.0091	0.7	0.08	58.3	0.4	57.1	5.2	6.3	223.6	58.3	0.4	921.6
6-18	1626	12912	4.7	21.2877	3.5	0.0589	3.6	0.0091	0.9	0.24	58.3	0.5	58.1	2.1	48	84.4	58.3	0.5	121.6
6-19	491	3687	7.5	20.941	4.5	0.06	4.7	0.0091	1.3	0.27	58.5	0.7	59.1	2.7	87.1	106.3	58.5	0.7	67.1
6-20	311	2184	3.7	20.4496	24.2	0.0616	24.3	0.0091	1.9	0.08	58.6	1.1	60.7	14.3	143.1	576.1	58.6	1.1	41
6-21	509	2133	3.5	19.0117	9.3	0.0662	9.4	0.0091	0.7	0.07	58.6	0.4	65.1	5.9	311.5	213	58.6	0.4	18.8
6-22	346	1281	1.9	15.7998	25	0.0797	25.1	0.0091	1.6	0.07	58.6	1	77.9	18.8	718	539.7	58.6	1	8.2
6-23	863	5541	2.8	22.1763	11.2	0.0569	11.4	0.0091	1.6	0.14	58.7	1	56.1	6.2	-50.6	274.1	58.7	1	-116
6-24	782	2805	3	21.3841	12.8	0.059	12.9	0.0091	1.5	0.12	58.7	0.9	58.2	7.3	37.2	308.2	58.7	0.9	158
6-25	792	5013	2.7	20.5573	5.7	0.0614	6.3	0.0092	2.7	0.43	58.7	1.6	60.5	3.7	130.7	133	58.7	1.6	44.9
6-26	676	6123	2.2	20.6055	4.2	0.0613	4.3	0.0092	0.9	0.2	58.8	0.5	60.4	2.5	125.2	99.5	58.8	0.5	47
6-27	767	2526	2.2	19.6794	6.7	0.0643	6.7	0.0092	1.1	0.16	58.9	0.6	63.3	4.1	232.4	153.7	58.9	0.6	25.3
6-28	143	1626	2.1	22.9361	18	0.0554	18.4	0.0092	3.5	0.19	59.1	2.1	54.7	9.8	-133.2	449.4	59.1	2.1	-44.4
6-29	393	4014	2.8	21.1189	9.5	0.0605	9.9	0.0093	2.6	0.27	59.4	1.5	59.6	5.7	66.9	227	59.4	1.5	88.8
6-30	496	5088	3.9	21.7481	6.5	0.0591	6.7	0.0093	1.4	0.21	59.8	0.8	58.3	3.8	-3.4	158.1	59.8	0.8	-1779.9
6-31	462	2262	3.6	18.9028	12.1	0.068	12.1	0.0093	0.5	0.04	59.8	0.3	66.8	7.8	324.6	276.2	59.8	0.3	18.4
6-32	362	2172	2.9	20.0046	14.8	0.0644	14.9	0.0093	1.8	0.12	59.9	1.1	63.3	9.2	194.5	345.9	59.9	1.1	30.8
6-33	165	1275	2.2	22.2877	18.9	0.058	18.9	0.0094	0.7	0.03	60.2	0.4	57.3	10.6	-62.8	465.5	60.2	0.4	-95.8
6-34	395	4323	3.8	21.4088	15.5	0.0605	15.5	0.0094	0.9	0.05	60.3	0.5	59.7	9	34.4	372.7	60.3	0.5	175.2
6-35	510	1362	3.1	17.7153	9.7	0.0732	9.7	0.0094	0.8	0.08	60.3	0.5	71.7	6.7	470	215.2	60.3	0.5	12.8
6-36	231	1866	5.1	21.2328	15.8	0.0611	16	0.0094	2.4	0.15	60.4	1.5	60.2	9.3	54.1	378.9	60.4	1.5	111.6
6-37	646	3888	2.7	21.5459	10	0.0605	10.3	0.0094	2.5	0.24	60.6	1.5	59.6	6	19.1	240.5	60.6	1.5	316.8
6-38	137	2028	2.9	25.8814	70.1	0.0505	70.1	0.0095	2.2	0.03	60.9	1.3	50	34.3	-441.2	2099.3	60.9	1.3	-13.8
6-39	582	3402	1.7	23.7085	23.9	0.0552	23.9	0.0095	0.9	0.04	60.9	0.6	54.5	12.7	-215.8	608.1	60.9	0.6	-28.2
6-40	355	1665	3.1	18.7017	9.1	0.07	9.1	0.0095	0.7	0.08	60.9	0.4	68.7	6.1	348.9	206.4	60.9	0.4	17.5
6-41	401	4230	3.7	21.3699	4.3	0.0613	4.7	0.0095	2	0.42	60.9	1.2	60.4	2.8	38.7	102.7	60.9	1.2	157.3
6-42	445	3834	2.6	20.8269	8.2	0.0629	8.4	0.0095	1.9	0.23	61	1.2	62	5.1	100	194.3	61	1.2	61
6-43	703	9309	2.6	21.9017	7.2	0.0599	7.4	0.0095	1.8	0.25	61	1.1	59	4.2	-20.4	173.6	61	1.1	-299.7
6-44	349	2229	4	18.1867	13.1	0.0722	13.2	0.0095	1.3	0.1	61.1	0.8	70.8	9	411.6	295	61.1	0.8	14.8
6-45	329	2421	3.1	21.6417	10.1	0.0609	10.2	0.0096	1.1	0.11	61.3	0.7	60	5.9	8.4	243.7	61.3	0.7	728.5
6-46	238	1443	1.9	16.9248	16.7	0.0786	16.7	0.0096	1	0.06	61.9	0.6	76.8	12.3	570.2	364.8	61.9	0.6	10.8
6-47	346	3471	2.4	17.856	13.3	0.0745	13.4	0.0096	2.1	0.15	61.9	1.3	73	9.5	452.5	295.8	61.9	1.3	13.7
6-48	1412	8232	1.8	20.1943	7.3	0.0661	7.3	0.0097	0.9	0.12	62.1	0.5	65	4.6	172.5	170.4	62.1	0.5	36
6-49	1610	13752	3.4	19.8151	4.4	0.0674	4.5	0.0097	0.8	0.17	62.1	0.5	66.2	2.9	216.5	102.5	62.1	0.5	28.7
6-50	649	4896	4.4	21.5526	10.7	0.062	10.8	0.0097	1.6	0.15	62.2	1	61.1	6.4	18.4	257.6	62.2	1	338.4
6-51	335	3009	3.8	22.637	12.6	0.0592	12.7	0.0097	1.7	0.13	62.4	1	58.4	7.2	-100.9	310.6	62.4	1	-61.8
6-52	380	2286	2.6	16.7388	22.5	0.0802	22.5	0.0097	0.9	0.04	62.5	0.5	78.3	16.9	594.2	492.3	62.5	0.5	10.5
6-53	295	2466	3	18.6566	23.9	0.072	24.1	0.0097	2.4	0.1	62.5	1.5	70.6	16.4	354.3	547.4	62.5	1.5	17.6
6-54	483	3342	3	21.7833	8.4	0.0617	9.4	0.0098	4.1	0.43	62.6	2.5	60.8	5.5	-7.3	203.6	62.6	2.5	-863
6-55	221	1926	2.6	22.4716	14.1	0.0601	14.1	0.0098	0.5	0.04	62.8	0.3	59.3	8.1	-82.9	347.5	62.8	0.3	-75.8
6-56	137	1077	2.3	18.5238	24.7	0.0729	24.8	0.0098	1.2	0.05	62.9	0.7	71.5	17.1	370.4	565	62.9	0.7	17
6-57	512	5274	4.1	20.9405	4.2	0.0645	4.2	0.0098	0.5	0.12	62.9	0.3	63.5	2.6	87.1	99.1	62.9	0.3	72.1
6-58	646	1635	3.2	16.2578	14.7	0.0832	14.7	0.0098	1	0.07	62.9	0.7	81.2	11.5	657.1	316.3	62.9	0.7	9.6
6-59	375	1485	2.4	13.4691	26.6	0.1005	26.6	0.0098	1.4	0.05	63	0.9	97.2	24.7	1048.1	545.3	63	0.9	6
6-60	398	2565	3.3	23.5498	16.9	0.0578	17	0.0099	1.9	0.11	63.3	1.2	57.1	9.5	-199	426.9	63.3	1.2	-31.8
6-61	348	2436	3.5	21.5544	16.6	0.0637	16.8	0.01	2	0.12	63.8	1.3	62.7	10.2	18.1	402	63.8	1.3	352.1
6-62	1450	11139	2.9	20.6068	2.3	0.0678	2.8	0.0101	1.6	0.57	65	1	66.6	1.8	125	54.5	65	1	52
6-63	2156	2679	2.7	16.43	5.1	0.0884	5.8	0.0105	2.8	0.48	67.6	1.9	86	4.8	634.5	109.4	67.6	1.9	10.6
6-64	952	10785	3.3	20.0489	5.7	0.0743	5.7	0.0108	0.7	0.13	69.2	0.5	72.7	4	189.3	132.6	69.2	0.5	36.6
6-65	150	444	2.3	9.6623	12.5	0.1546	12.6	0.0108	2	0.15	69.4	1.3	145.9	17.2	1687.7	231.3	69.4	1.3	4.1
6-66	77	1476	3.1	24.923	29.8	0.0766	29.9	0.0138	2.9	0.1	88.6	2.6	74.9	21.6	-343	781.9	88.6	2.6	-25.8
6-67	50	834	2.5	12.4525	30.1	0.1572	31.1	0.0142	7.9	0.25	90.9	7.1	148.2	43	1204.5	606.8	90.9	7.1	7.5
6-68	152	2364	3	29.4433	73	0.0665	73	0.0142	0.9	0.01	90.9	0.8	65.4	46.2	-793	2378	90.9	0.8	-11.5
6-69	152	2196	2.9	24.4531	23.6	0.0806	23.8	0.0143	3	0.13	91.4	2.7	78.7	18	-294.1	609.1	91.4	2.7	-31.1
6-70	48	1200	2.4	19.115	29.7	0.1047	30.1	0.0145	4.9	0.16	92.9	4.5	101.1	29	299.2	692.1	92.9	4.5	31
6-71	1033	9393	1.1	20.4029	4.4	0.0981	5.2	0.0145	2.9	0.55	92.9	2.6	95	4.7	148.5	102.5	92.9	2.6	62.6
6-72	77	930	2.6	23.1167	97.4	0.0866	97.5	0.0145	4.4	0.04	92.9	4	84.4	79	-152.7	1126.2	92.9	4	-60.9
6-73	312	4071	1.9	17.67	32.3	0.1137	32.4	0.0146	3.3	0.1	93.3	3	109.4	33.6	475.7	731.2	93.3	3	19.6
6-74	254	3696	2.7	22.5256	13.3	0.0896	13.6	0.0146	3	0.22	93.6	2.8	87.1	11.4	-88.8	326.8	93.6	2.8	-105.5
6-75	213	6612	2.7	27.1318	27.8	0.0747	27.8	0.0147	1.6	0.06	94.1	1.5	73.2	19.6	-567	761.7	94.1	1.5	-16.6
6-76	188	2505	2.7	22.8026	15.5	0.0891	15.6	0.0147	0.8	0.05	94.3	0.7	86.7	12.9	-118.8	385.1	94.3	0.7	-79.4
6-77	179	3564	2.5	25.4907	106.6	0.0803	106.6	0.0148	1.4	0.01	94.9	1.4	78.4	80.6	-401.4	1435	94.9	1.4	-23.7
6-78	145	2286	2.5	22.5902	26.1	0.0909	26.1	0.0149	1.9	0.07	95.3	1.8	88.3	22.1	-95.8	649	95.3	1.8	-99.5
6-79	530	8277	1.5	21.9517	8	0.0942	8.2	0.015	2.1	0.26	95.9	2	91.4	7.2	-25.9	193.1	95.9	2	-370.8
6-80	224	3651	3	19.6143	19.6	0.106	19.6	0.0151	0.9	0.05	96.5	0.9	102.3	19.1	240.1	455.6	96.5	0.9	40.2
6-81	130	2073	2.7	21.4511	12.7	0.0974	12.8	0.0152	1.8	0.14	97	1.7	94.4	11.6	29.7	305.5	97	1.7	326.7
6-82	329	4734	2.3	20.6208	11.6	0.1013	11.7	0.0152	1.5	0.13	97	1.5	98	11	123.5	274.9	97	1.5	78.5
6-83	234	2355	2.8	19.3414	5	0.1082	5.7	0.0152	2.8	0.48	97.1	2.7	104.4	5.6	272.3	114.2	97.1	2.7	35.7
6-84	164	2439	3	21.9047	13.9	0.0957	14	0.0152	2.1	0.15	97.3	2.1	92.8	12.4	-20.7	336.7	97.3	2.1	-470.3
6-85	406	3705	2	20.4666	15.7	0.1027	15.8	0.0153	1.3	0.08	97.6	1.3	99.3	14.9	141.1	371.5	97.6	1.3	69.1
6-86	211	3084	2.2	21.7622	9.4	0.097	9.4	0.0153	0.7	0.07	97.9	0.6	94	8.5	-4.9	227.6	97.9	0.6	-1989
6-87	329	5394	2.4	21.6666	6.8	0.0981	7.5	0.0154	3.1	0.41	98.6	3	95	6.8	5.7	164.6	98.6	3	1735.4
6-88	137	1851	1.9	19.2552	19	0.111	19	0.0155	1.3	0.07	99.2	1.3	106.9	19.3	282.5	437.6	99.2	1.3	35.1
6-89	204	2595	3	20.7657	26.9	0.1032	27.1	0.0155	3.1	0.11	99.4	3	99.7	25.7	107	645.7	99.4	3	92.9
6-90	133	2070	2.9	21.3207	23.6	0.1007	23.6	0.0156	0.9	0.04	99.6	0.9	97.5	21.9	44.3	570.2	99.6	0.9	225.1
6-91	273	4161	1.8	21.2118	10.7	0.1016	10.7	0.0156	1.2	0.11	100	1.2	98.3	10.1	56.5	255	100	1.2	177
6-92	301	3786	2.4	20.7607	9.7	0.1044	9.9	0.0157	2	0.2	100.6	1.9	100.8	9.5	107.5	228.8	100.6	1.9	93.5
6-93	104	1593	2.2	25.5338	34.4	0.0849	34.4	0.0157	1.2	0.03	100.6	1.2	82.8	27.4	-405.8	921.1	100.6	1.2	-24.8
6-94	310	2934	2.9	19.3446	12.8	0.1126	12.8	0.0158	0.6	0.04	101	0.6	108.3	13.2	271.9	294.1	101	0.6	37.2
6-95	142	2310	3.2	21.7637	12.7	0.1002	12.7	0.0158	1.2	0.09	101.2	1.2	97	11.8	-5.1	307.3	101.2	1.2	-1991.1
6-96	57	1083	3.7	21.5629	30.8	0.1012	31.9	0.0158	8.1	0.25	101.3	8.1	97.9	29.8	17.2	756.4	101.3	8.1	589.4
6-97	156	1329	2.2	16.1035	10.5	0.1357	10.6	0.0158	1.5	0.14	101.4	1.5	129.2	12.9	677.5	225.2	101.4	1.5	15
6-98	378	4347	2.1	18.8329	5.9	0.1169	6.1	0.016	1.8	0.29	102.1	1.8	112.3	6.5	333	133	102.1	1.8	30.7
6-99	218	2304	2.8	20.6081	11.5	0.1096	11.6	0.0164	1.6	0.13	104.7	1.6	105.6	11.6	124.9	270.5	104.7	1.6	83.9
6-100	160	2010	3	19.7186	24.6	0.1147	24.8	0.0164	2.8	0.11	104.9	2.9	110.2	25.9	227.8	577.1	104.9	2.9	46
6-101	314	4329	3.3	18.0732	8.7	0.1269	8.7	0.0166	0.8	0.09	106.4	0.8	121.3	10	425.6	194.7	106.4	0.8	25
6-102	153	2076	2.4	29.3199	40.7	0.0794	40.7	0.0169	2	0.05	108	2.2	77.6	30.4	-781.1	1188.9	108	2.2	-13.8
6-103	197	2874	2	20.7372	10.3	0.1152	10.3	0.0173	0.9	0.09	110.7	1	110.7	10.8	110.2	243.1	110.7	1	100.4
6-104	338	435	3.5	8.0405	16.1	0.1696	16.2	0.0099	1.5	0.09	63.4	1	159.1	23.9	2019.8	288.2	2019.8	288.2	3.1
6-105	483	549	2.6	7.1753	36	0.1838	36.1	0.0096	2.3	0.06	61.4	1.4	171.3	57	2219.3	647.8	2219.3	647.8	2.8
7 - Matanuska River (Matanuska Valley)
							Isotope ratios						Apparent ages (Ma)
Analysis	U	206Pb	U/Th	206Pb*	±	207Pb*	±	206Pb*	±	error	206Pb*	±	207Pb*	±	206Pb*	±	Best age	±	Conc
	(ppm)	204Pb		207Pb*	(%)	235U*	(%)	238U	(%)	corr.	238U*	(Ma)	235U	(Ma)	207Pb*	(Ma)	(Ma)	(Ma)	(%)
7-1	364	30386	4.4	22.9789	13.2	0.0679	13.5	0.0113	2.7	0.2	72.6	2	66.7	8.7	-137.9	329	72.6	2	NA
7-2	2688	286084	2.7	20.6778	1.7	0.0717	1.9	0.0107	0.9	0.45	68.9	0.6	70.3	1.3	117	39.7	68.9	0.6	NA
7-3	296	25343	2.8	20.7801	14.9	0.0668	15.8	0.0101	5	0.32	64.6	3.2	65.7	10	105.3	354.6	64.6	3.2	NA
7-4	238	22465	3.8	20.8674	22.9	0.0763	24.1	0.0115	7.5	0.31	74	5.5	74.6	17.4	95.4	549.5	74	5.5	NA
7-5	148	15180	1.7	24.6455	26.1	0.0762	27.1	0.0136	7.4	0.27	87.3	6.4	74.6	19.5	-314.2	679.1	87.3	6.4	NA
7-6	134	24895	2.4	22.7662	8.9	0.1646	9.8	0.0272	4.1	0.42	172.9	7.1	154.7	14.1	-114.9	219.9	172.9	7.1	NA
7-7	508	40647	3.9	19.8401	9.1	0.0766	10.2	0.011	4.6	0.45	70.6	3.2	74.9	7.3	213.6	210.8	70.6	3.2	NA
7-8	99	42009	2.4	22.1112	21.9	0.1473	24	0.0236	9.9	0.41	150.5	14.7	139.5	31.3	-43.4	538.2	150.5	14.7	NA
7-9	65	27493	3.6	17.1374	20.5	0.2229	22.5	0.0277	9.3	0.41	176.2	16.2	204.4	41.7	543	452.5	176.2	16.2	NA
7-10	160	20394	2.7	19.548	27.5	0.1025	28	0.0145	5	0.18	93	4.6	99.1	26.4	247.9	644	93	4.6	NA
7-11	226	14116	2.6	29.1546	37.4	0.0481	38.3	0.0102	8.5	0.22	65.3	5.5	47.7	17.9	-765.2	1083.1	65.3	5.5	NA
7-12	529	36428	2.4	21.2961	9.7	0.0916	9.9	0.0142	2.2	0.22	90.6	2	89	8.5	47	232	90.6	2	NA
7-13	58	11430	3.2	19.1257	13.7	0.3747	15.3	0.052	6.7	0.44	326.6	21.5	323.1	42.3	297.9	314.4	326.6	21.5	NA
7-14	343	17406	4.2	23.9453	10.7	0.0569	10.9	0.0099	2.3	0.21	63.4	1.4	56.2	6	-240.9	270.3	63.4	1.4	NA
7-15	259	18537	1.9	22.8315	22	0.0695	22.8	0.0115	5.7	0.25	73.8	4.2	68.3	15	-122	549.1	73.8	4.2	NA
7-16	318	27232	1.5	20.6287	12.2	0.1149	12.9	0.0172	4	0.31	109.9	4.4	110.5	13.5	122.6	289	109.9	4.4	NA
7-17	70	9425	3.3	23.2733	39.5	0.1419	40.1	0.0239	7	0.17	152.5	10.5	134.7	50.6	-169.5	1018.1	152.5	10.5	NA
7-18	128	16990	4.1	21.911	17.9	0.1504	19.2	0.0239	7	0.36	152.3	10.5	142.3	25.6	-21.4	436.8	152.3	10.5	NA
7-19	253	16737	6.2	20.3047	14.9	0.074	15.3	0.0109	3.3	0.22	69.9	2.3	72.5	10.7	159.7	350.8	69.9	2.3	NA
7-20	122	37043	2.2	22.5453	34.7	0.1429	34.8	0.0234	2.9	0.08	148.9	4.2	135.7	44.2	-90.9	873.7	148.9	4.2	NA
7-21	141	46338	3.5	20.9976	22	0.1612	22.1	0.0245	2.3	0.1	156.3	3.5	151.7	31.2	80.6	528.1	156.3	3.5	NA
7-22	432	105340	3.2	18.8051	9.1	0.0717	9.8	0.0098	3.5	0.35	62.7	2.2	70.3	6.6	336.4	207.1	62.7	2.2	NA
7-23	178	41760	2.2	20.3424	30.4	0.0895	30.6	0.0132	3.6	0.12	84.6	3.1	87.1	25.6	155.4	727	84.6	3.1	NA
7-24	199	22451	2.5	22.0044	26.8	0.0749	27.5	0.012	6.3	0.23	76.6	4.8	73.3	19.5	-31.7	660.2	76.6	4.8	NA
7-25	1057	123764	6.5	19.4355	7.5	0.07	10.6	0.0099	7.5	0.71	63.3	4.7	68.7	7	261.1	172	63.3	4.7	NA
7-26	255	36514	2.8	22.6962	21.5	0.0761	21.6	0.0125	2.1	0.1	80.2	1.7	74.4	15.5	-107.3	535.4	80.2	1.7	NA
7-27	2313	231344	4.1	20.8764	1.5	0.0744	2.6	0.0113	2.1	0.82	72.2	1.5	72.8	1.8	94.4	35.3	72.2	1.5	NA
7-28	161	13655	2.6	22.1253	19	0.0668	19.4	0.0107	3.8	0.2	68.8	2.6	65.7	12.3	-45	466	68.8	2.6	NA
7-29	138	60183	2.3	18.5457	13.8	0.1956	14.5	0.0263	4.3	0.3	167.4	7.2	181.4	24.1	367.7	312.6	167.4	7.2	NA
7-30	116	24164	3.3	16.837	24.7	0.1352	25.3	0.0165	5.5	0.22	105.5	5.7	128.7	30.6	581.5	543.8	105.5	5.7	NA
7-31	588	81918	3.4	19.7565	7	0.0712	7.6	0.0102	3.1	0.4	65.4	2	69.9	5.1	223.4	161.2	65.4	2	NA
7-32	876	140135	3.8	21.0191	6.8	0.0693	7.6	0.0106	3.5	0.46	67.7	2.4	68	5	78.2	160.9	67.7	2.4	NA
7-33	820	65205	3.5	21.7137	5.9	0.0702	6.3	0.0111	2.2	0.35	70.9	1.5	68.9	4.2	0.5	141.5	70.9	1.5	NA
7-34	900	36010	3.5	20.7966	6.9	0.0624	7.1	0.0094	1.6	0.23	60.4	1	61.5	4.3	103.5	164.3	60.4	1	NA
7-35	117	8715	2.1	22.8529	27.6	0.1266	29.2	0.021	9.7	0.33	133.9	12.8	121	33.3	-124.3	691.7	133.9	12.8	NA
7-36	83	95792	3	9.8776	1.7	3.9966	2.5	0.2863	1.8	0.72	1623.1	25.7	1633.5	20.2	1646.9	31.9	1646.9	31.9	98.6
7-37	216	13969	4.6	21.1808	19.1	0.0709	19.5	0.0109	3.6	0.18	69.8	2.5	69.6	13.1	60	459.4	69.8	2.5	NA
7-38	106	10292	2.9	19.968	25.5	0.087	26.7	0.0126	7.9	0.3	80.7	6.3	84.7	21.7	198.7	600.8	80.7	6.3	NA
7-39	320	28648	8.9	24.8848	14.5	0.059	15.2	0.0106	4.5	0.3	68.3	3.1	58.2	8.6	-339	375.7	68.3	3.1	NA
7-40	223	20059	1.7	36.1262	67.4	0.0367	67.5	0.0096	3.1	0.05	61.7	1.9	36.6	24.3	-1413.3	656.8	61.7	1.9	NA
7-41	209	18074	2.9	22.4013	25.2	0.0584	26.3	0.0095	7.4	0.28	60.9	4.5	57.6	14.7	-75.2	625.8	60.9	4.5	NA
7-42	273	16033	4.7	22.2031	18.9	0.0632	19.3	0.0102	3.6	0.19	65.3	2.4	62.3	11.6	-53.5	464	65.3	2.4	NA
7-43	71	10993	2.9	22.4031	30.4	0.1596	31.4	0.0259	7.8	0.25	165	12.7	150.4	43.9	-75.4	758.3	165	12.7	NA
7-44	656	45288	4.4	19.9783	6.6	0.0774	7.8	0.0112	4.1	0.53	71.9	2.9	75.7	5.7	197.5	154.6	71.9	2.9	NA
7-45	295	100613	3	20.1937	10.6	0.1808	11.1	0.0265	3.3	0.3	168.4	5.5	168.7	17.3	172.5	248.6	168.4	5.5	NA
7-46	323	97650	3.2	20.0955	8.1	0.195	8.5	0.0284	2.4	0.28	180.6	4.3	180.8	14	183.9	189.5	180.6	4.3	NA
7-47	537	141747	5.1	20.8341	8.7	0.0875	9.3	0.0132	3.3	0.35	84.6	2.8	85.1	7.6	99.2	206.5	84.6	2.8	NA
7-48	78	33758	4	18.7032	24.7	0.1977	25.4	0.0268	5.8	0.23	170.6	9.8	183.2	42.6	348.7	566.2	170.6	9.8	NA
7-49	80	32475	4.3	17.3296	14.3	0.1866	15.1	0.0235	4.9	0.33	149.5	7.3	173.7	24.1	518.6	314.8	149.5	7.3	NA
7-50	144	319396	3.3	9.0472	0.5	4.779	1.7	0.3136	1.6	0.95	1758.3	25	1781.2	14.3	1808.2	9.3	1808.2	9.3	97.2
7-51	935	115884	3.1	20.7547	2.9	0.1114	4.4	0.0168	3.3	0.76	107.2	3.5	107.2	4.5	108.2	67.8	107.2	3.5	NA
7-52	495	42340	1.9	22.2478	14.5	0.062	15.8	0.01	6.5	0.41	64.1	4.1	61	9.4	-58.4	353.8	64.1	4.1	NA
7-53	2521	263637	7.7	20.8785	2	0.0866	2.9	0.0131	2.1	0.72	84	1.8	84.3	2.4	94.1	47.4	84	1.8	NA
7-54	1635	256795	2.8	20.7511	1.4	0.1101	3.6	0.0166	3.3	0.92	105.9	3.5	106	3.7	108.6	34.2	105.9	3.5	NA
7-55	909	104971	7.8	21.2699	4.4	0.0726	5.4	0.0112	3.1	0.58	71.8	2.2	71.2	3.7	50	105.3	71.8	2.2	NA
7-56	75	24784	2.7	23.434	19.2	0.1551	21.4	0.0264	9.4	0.44	167.7	15.6	146.4	29.1	-186.6	482.6	167.7	15.6	NA
7-57	232	40718	6.2	19.735	12.5	0.1147	12.7	0.0164	2.5	0.19	105	2.6	110.3	13.3	225.9	289	105	2.6	NA
7-58	561	27363	2.6	19.7988	10.9	0.0738	11.9	0.0106	4.7	0.39	67.9	3.2	72.3	8.3	218.5	253.5	67.9	3.2	NA
7-59	1129	70465	3.9	20.3833	4.3	0.0654	4.7	0.0097	1.8	0.39	62.1	1.1	64.4	2.9	150.7	101.5	62.1	1.1	NA
7-60	460	114398	2.2	19.0448	10.2	0.1377	10.7	0.019	3.4	0.32	121.4	4.1	131	13.2	307.6	232.6	121.4	4.1	NA
7-61	822	83442	3.9	21.5541	6.9	0.0742	7.1	0.0116	1.7	0.24	74.3	1.3	72.7	5	18.2	165.6	74.3	1.3	NA
7-62	560	1257111	2	8.9772	0.3	4.6871	3	0.3052	3	1	1716.9	44.6	1764.9	24.9	1822.3	5.3	1822.3	5.3	94.2
7-63	302	72968	5.1	19.8569	5.4	0.1923	6.1	0.0277	2.7	0.44	176.1	4.7	178.6	9.9	211.6	125.9	176.1	4.7	NA
7-64	204	20057	3.3	19.7947	28.4	0.0824	29.9	0.0118	9.3	0.31	75.8	7	80.4	23.1	218.9	668.2	75.8	7	NA
7-65	520	32337	3.9	21.0858	8.2	0.0668	8.5	0.0102	2.4	0.28	65.6	1.5	65.7	5.4	70.7	194.8	65.6	1.5	NA
7-66	153	12614	4.9	18.2022	25.5	0.0831	26.7	0.011	7.8	0.29	70.4	5.5	81.1	20.8	409.7	578.7	70.4	5.5	NA
7-67	279	15280	3.5	23.1299	23.1	0.0556	23.4	0.0093	3.4	0.15	59.8	2	54.9	12.5	-154.1	581	59.8	2	NA
7-68	498	35902	5.1	20.8635	12.5	0.0706	13.1	0.0107	3.7	0.29	68.5	2.5	69.2	8.8	95.8	298	68.5	2.5	NA
7-69	138	22142	3.2	20.5015	41.6	0.0783	42.2	0.0116	7.3	0.17	74.6	5.4	76.6	31.2	137.2	1017.8	74.6	5.4	NA
7-70	2125	464528	3.6	20.4332	2.2	0.078	2.6	0.0116	1.4	0.53	74.1	1	76.3	1.9	144.9	51.5	74.1	1	NA
7-71	199	25136	1.3	19.8937	20.5	0.0747	20.9	0.0108	3.8	0.18	69.1	2.6	73.1	14.7	207.4	480.1	69.1	2.6	NA
7-72	249	98883	1.6	18.9821	6.1	0.2106	6.6	0.029	2.5	0.38	184.2	4.6	194.1	11.6	315.1	138.5	184.2	4.6	NA
7-73	88	14468	1.6	13.2534	33.8	0.1281	34.2	0.0123	5.1	0.15	78.9	4	122.4	39.4	1080.6	698	78.9	4	7.3
7-74	273	51984	7.3	20.443	7.5	0.1519	7.9	0.0225	2.2	0.28	143.6	3.1	143.6	10.5	143.8	177.3	143.6	3.1	NA
7-75	98	18904	3.3	23.5029	27.9	0.1532	28.8	0.0261	7.1	0.25	166.2	11.6	144.7	38.9	-194	710.9	166.2	11.6	NA
7-76	1368	115872	6.1	21.2061	4.1	0.0793	4.1	0.0122	0.7	0.16	78.2	0.5	77.5	3.1	57.1	97.4	78.2	0.5	NA
7-77	1203	76235	6.3	20.5351	3.4	0.0762	5.3	0.0113	4.1	0.77	72.7	2.9	74.5	3.8	133.3	79.6	72.7	2.9	NA
7-78	82	27051	3.3	23.4229	37.5	0.1371	38	0.0233	6	0.16	148.5	8.8	130.5	46.6	-185.4	966.9	148.5	8.8	NA
7-79	1041	240472	18.9	20.9579	6.3	0.0732	8.7	0.0111	6	0.68	71.3	4.2	71.7	6	85.2	150.3	71.3	4.2	NA
7-80	510	221105	1.5	19.9047	2.9	0.1961	4.1	0.0283	2.9	0.71	179.9	5.1	181.8	6.8	206.1	66.2	179.9	5.1	NA
7-81	147	65864	2.6	20.1311	19.4	0.1535	20.8	0.0224	7.6	0.36	142.9	10.7	145	28.2	179.8	456.1	142.9	10.7	NA
7-82	119	257175	1.1	16.5431	4.6	0.8795	4.8	0.1055	1.4	0.29	646.7	8.6	640.7	23	619.6	100.1	646.7	8.6	104.4
7-83	477	47214	2.3	18.1956	18.7	0.0753	20.5	0.0099	8.4	0.41	63.7	5.3	73.7	14.6	410.5	421.3	63.7	5.3	NA
7-84	990	205645	2.1	20.2519	1.8	0.1959	3.3	0.0288	2.8	0.85	182.9	5.1	181.7	5.5	165.8	41.3	182.9	5.1	NA
7-85	124	41035	1.8	19.5419	7	0.3688	7.4	0.0523	2.4	0.33	328.4	7.8	318.7	20.3	248.6	161.8	328.4	7.8	NA
7-86	150	88532	2.3	20.6171	9	0.2204	11.1	0.033	6.5	0.58	209	13.4	202.2	20.4	123.9	213	209	13.4	NA
7-87	584	99473	2.5	20.1778	11.6	0.069	12	0.0101	2.9	0.24	64.8	1.9	67.8	7.8	174.4	271.9	64.8	1.9	NA
7-88	197	30272	3.9	16.8965	18.6	0.0912	19.6	0.0112	5.9	0.3	71.7	4.2	88.6	16.6	573.9	408.4	71.7	4.2	NA
7-89	642	85245	2.5	20.8628	11.4	0.0666	12.1	0.0101	4.3	0.35	64.7	2.7	65.5	7.7	95.9	269.4	64.7	2.7	NA
7-90	240	38062	6	22.3886	21.2	0.0684	23.1	0.0111	9.1	0.4	71.2	6.5	67.2	15	-73.8	522.6	71.2	6.5	NA
8 - Sterling Formation (Clam Gulch area, Kenai Peninsula)
							Isotope ratios						Apparent ages (Ma)
Analysis	U	206Pb	U/Th	206Pb*	±	207Pb*	±	206Pb*	±	error	206Pb*	±	207Pb*	±	206Pb*	±	Best age	±	Conc
	(ppm)	204Pb		207Pb*	(%)	235U*	(%)	238U	(%)	corr.	238U*	(Ma)	235U	(Ma)	207Pb*	(Ma)	(Ma)	(Ma)	(%)
8-1	1048.42	3648	9.67862	20.6125	4.39043	0.0580542	4.54884	0.00867887	1.19	0.261605	55.7062	0.660048	57.2997	2.5343	124.398	103.426	55.7062	0.660048	44.7807
8-2	2031.87	15016	3.36626	20.4695	2.685	0.07995	2.9054	0.0118693	1.11	0.382048	76.0637	0.839346	78.0979	2.18399	140.813	63.045	76.0637	0.839346	54.0174
8-3	83.1652	1960	3.09499	21.7504	21.9876	0.175184	22.0628	0.027635	1.82	0.0824919	175.73	3.15508	163.908	33.4069	-3.60387	535.852	175.73	3.15508	-4876.13
8-4	456.918	1742	1.19756	20.4705	12.6965	0.0636566	13.1184	0.00945085	3.3	0.251556	60.638	1.99167	62.6619	7.97187	140.652	299.087	60.638	1.99167	43.1122
8-5	341.048	3070	2.51686	22.8631	9.00454	0.0631431	9.16734	0.0104703	1.72	0.187623	67.1452	1.1489	62.1716	5.52855	-125.367	222.717	67.1452	1.1489	-53.5589
8-6	293.634	354	9.29276	10.9162	5.90768	0.29035	6.11018	0.0229875	1.56	0.255312	146.509	2.25977	258.835	13.9613	1459.24	112.407	146.509	2.25977	10.0401
8-7	165.132	2116	3.15861	35.3861	50.5232	0.0320895	50.6238	0.00823559	3.19	0.0630139	52.8726	1.67974	32.0713	15.9833	-1346.44	1709.75	52.8726	1.67974	-3.92684
8-8	429.702	6768	3.61028	21.2791	2.47096	0.0974599	2.57654	0.015041	0.73	0.283326	96.2388	0.697325	94.4289	2.3233	48.9256	59.0163	96.2388	0.697325	196.704
8-9	80.6775	2552	2.02663	22.8675	27.2535	0.127349	27.6176	0.0211209	4.47	0.161853	134.736	5.9602	121.712	31.6879	-125.841	683.748	134.736	5.9602	-107.069
8-10	316.867	7062	2.81139	20.2916	3.27537	0.163997	4.27033	0.0241351	2.74	0.641637	153.737	4.16257	154.196	6.10913	161.253	76.6088	153.737	4.16257	95.3392
8-11	891.709	6732	2.33731	21.9153	5.69135	0.056671	5.76052	0.00900754	0.89	0.1545	57.8063	0.512177	55.9713	3.137	-21.8543	137.845	57.8063	0.512177	-264.508
8-12	212.728	5644	2.18671	21.0116	4.96211	0.162864	5.96478	0.0248189	3.31	0.554924	158.04	5.16751	153.207	8.48265	79.056	117.876	158.04	5.16751	199.909
8-13	224.802	2768	2.64867	22.7403	9.2919	0.0884655	9.47039	0.0145905	1.83	0.193234	93.3766	1.69648	86.0729	7.81566	-112.082	229.235	93.3766	1.69648	-83.3111
8-14	1212.42	8642	5.09327	20.4485	5.97247	0.0618135	6.35447	0.00916736	2.17	0.341492	58.8274	1.27075	60.901	3.75618	143.193	140.266	58.8274	1.27075	41.0826
8-15	273.254	6806	1.7034	19.3203	4.94917	0.213402	5.53576	0.0299028	2.48	0.447996	189.94	4.64178	196.403	9.88586	274.754	113.445	189.94	4.64178	69.1307
8-16	81.7387	1750	2.2179	24.0907	16.7715	0.123386	18.1202	0.0215582	6.86	0.378582	137.496	9.33238	118.137	20.211	-256.166	427.366	137.496	9.33238	-53.6747
8-17	58.1289	1650	2.46578	23.4308	39.6783	0.126247	40.3068	0.0214539	7.09	0.175901	136.838	9.59957	120.72	45.9083	-186.284	1026.59	136.838	9.59957	-73.4566
8-18	285.817	4810	1.18262	21.0323	6.72218	0.14529	7.19314	0.0221625	2.56	0.355894	141.309	3.57814	137.744	9.26574	76.7159	159.849	141.309	3.57814	184.197
8-19	114.615	2844	1.19188	20.8618	4.82397	0.186159	5.17013	0.0281665	1.86	0.359759	179.063	3.28474	173.346	8.23913	96.0575	114.229	179.063	3.28474	186.412
8-20	79.2967	942	1.60864	34.2993	42.4492	0.0423297	43.5839	0.01053	9.88	0.226689	67.5261	6.63676	42.0961	17.9739	-1247.53	1380.41	67.5261	6.63676	-5.41276
8-21	358.427	1982	2.69775	20.1233	7.8732	0.0595385	8.0422	0.00868953	1.64	0.203924	55.7744	0.910754	58.7231	4.58869	180.662	183.715	55.7744	0.910754	30.8721
8-22	908.837	7252	1.9905	21.6	3.17673	0.0695178	3.86985	0.0108905	2.21	0.571082	69.8251	1.53481	68.2417	2.55407	13.084	76.3784	69.8251	1.53481	533.669
8-23	130.602	748	2.01021	19.7086	11.0404	0.166214	11.0672	0.0237587	0.770006	0.0695756	151.367	1.15196	156.128	16.0174	228.979	255.696	151.367	1.15196	66.1053
8-24	390.196	4508	1.75178	20.2673	3.43423	0.165052	3.49336	0.0242615	0.640001	0.183205	154.532	0.977249	155.116	5.0252	164.019	80.3217	154.532	0.977249	94.2164
8-25	216.688	378	1.55695	21.4107	202.995	0.0097342	203.123	0.00151157	7.21	0.0354958	9.73687	0.701498	9.83615	19.8855	34.2009	0	9.73687	0.701498	28.4697
8-26	581.677	2822	3.6558	24.6864	18.0088	0.0314165	18.2392	0.0056249	2.89	0.15845	36.1588	1.04206	31.4089	5.64111	-318.447	465.049	36.1588	1.04206	-11.3547
8-27	622.346	6230	2.82319	21.9021	5.97837	0.0565772	6.14011	0.00898723	1.4	0.228009	57.6766	0.803871	55.8812	3.33847	-20.4003	144.773	57.6766	0.803871	-282.724
8-28	198.339	5960	2.4642	19.6096	7.07022	0.168728	7.20364	0.0239969	1.38	0.19157	152.867	2.08475	158.315	10.5602	240.618	163.156	152.867	2.08475	63.5311
8-29	87.3417	4228	3.43741	23.9273	15.4822	0.121711	16.4101	0.0211214	5.44	0.331503	134.739	7.25375	116.622	18.0815	-238.96	392.827	134.739	7.25375	-56.3858
8-30	1074.57	12306	4.12507	20.7557	4.84502	0.0571073	5.24925	0.00859661	2.02	0.384817	55.1805	1.10989	56.3905	2.87939	108.094	114.481	55.1805	1.10989	51.0487
8-31	186.962	3054	2.3761	21.6354	7.8272	0.0838498	7.96589	0.0131572	1.48	0.185792	84.2639	1.23899	81.758	6.25752	9.14167	188.579	84.2639	1.23899	921.757
8-32	161.218	2020	3.8888	21.8519	17.5104	0.0686551	19.1488	0.0108808	7.75	0.404725	69.7633	5.3775	67.4224	12.4919	-14.8492	426.008	69.7633	5.3775	-469.813
8-33	1478.32	5244	4.79651	21.1951	3.84896	0.0628988	4.01996	0.0096689	1.16	0.28856	62.0303	0.716101	61.9382	2.41548	58.4024	91.7674	62.0303	0.716101	106.212
8-34	213.482	3354	3.99316	21.8793	15.6824	0.0771514	15.8146	0.0122427	2.04	0.128995	78.4422	1.59052	75.4632	11.502	-17.8827	381.258	78.4422	1.59052	-438.648
8-35	640.011	29290	1.51884	19.073	3.03208	0.334665	3.22205	0.0462943	1.09	0.338294	291.731	3.10898	293.121	8.2037	304.204	69.0908	291.731	3.10898	95.8995
8-36	514.727	3558	3.42588	18.9463	18.716	0.0723847	18.7895	0.00994649	1.66	0.0883474	63.8024	1.0539	70.9599	12.8785	319.404	428.657	63.8024	1.0539	19.9755
8-37	359.717	3960	2.94306	21.3969	13.0577	0.0644504	13.4206	0.0100017	3.1	0.230988	64.1549	1.97894	63.4194	8.25111	35.7265	313.732	64.1549	1.97894	179.572
8-38	469.847	4818	9.25694	20.0629	7.39577	0.0753745	7.58197	0.0109678	1.67	0.220259	70.3178	1.16793	73.7869	5.39611	187.663	172.316	70.3178	1.16793	37.4703
8-39	401.779	2888	3.28887	20.4252	10.9412	0.0558778	11.9358	0.00827761	4.77	0.399638	53.1413	2.52442	55.2088	6.41375	145.892	257.258	53.1413	2.52442	36.4252
8-40	425.297	814	1.54257	19.3179	18.871	0.0555413	19.0632	0.00778169	2.7	0.141634	49.9698	1.34397	54.8852	10.1855	275.047	435.709	49.9698	1.34397	18.1677
8-41	123.481	730	1.93961	18.8465	32.0567	0.0790689	33.1825	0.0108077	8.57	0.258269	69.2973	5.90698	77.2692	24.6934	331.38	744.318	69.2973	5.90698	20.9117
8-42	396.027	3256	2.24859	21.1688	6.51018	0.0641861	6.67851	0.00985454	1.49	0.223104	63.2155	0.937307	63.1673	4.09011	61.3332	155.255	63.2155	0.937307	103.069
8-43	573.86	4976	2.08494	22.4422	7.09442	0.0605854	7.91523	0.00986126	3.51	0.443449	63.2584	2.20951	59.7258	4.59112	-79.6887	173.793	63.2584	2.20951	-79.3819
8-44	263.931	4206	4.54789	19.8212	12.2892	0.0924869	12.4759	0.0132956	2.15	0.172332	85.1444	1.81857	89.8174	10.7246	215.841	285.495	85.1444	1.81857	39.4477
8-45	205.562	9098	2.0798	18.7123	5.51555	0.35167	5.63621	0.0477267	1.16	0.205812	300.549	3.40635	305.976	14.8906	347.559	124.809	300.549	3.40635	86.4743
8-46	1372.17	7692	2.99731	20.841	3.63188	0.05435	3.83131	0.00821519	1.22	0.318429	52.7422	0.64083	53.7386	2.00536	98.3948	85.96	52.7422	0.64083	53.6026
8-47	203.599	1378	5.72245	26.9757	23.6108	0.0273302	25.2185	0.00534705	8.86	0.35133	34.3775	3.03774	27.3781	6.81219	-551.399	642.512	34.3775	3.03774	-6.23459
8-48	114.055	1372	2.26937	24.3172	63.0278	0.0566713	63.3062	0.00999484	5.93	0.0936717	64.111	3.78294	55.9717	34.4879	-279.937	1773.45	64.111	3.78294	-22.9019
8-49	111.305	1410	2.19026	24.3584	18.4258	0.0771266	18.9509	0.0136255	4.43	0.233762	87.2425	3.83881	75.4398	13.7792	-284.249	472.75	87.2425	3.83881	-30.6922
8-50	192.599	2868	2.89653	23.733	18.87	0.0617559	19.4273	0.0106299	4.62	0.23781	68.1633	3.13255	60.8459	11.474	-218.413	478.039	68.1633	3.13255	-31.2084
8-51	134.653	3634	2.63037	21.1556	7.64858	0.200059	7.78668	0.030696	1.46	0.1875	194.903	2.803	185.176	13.1814	62.8357	182.412	194.903	2.803	310.179
8-52	216.779	2256	2.94851	22.9004	11.5095	0.0898458	11.5884	0.0149224	1.35	0.116496	95.4854	1.27955	87.3598	9.70062	-129.385	285.178	95.4854	1.27955	-73.7995
8-53	345.909	17686	2.26708	18.9118	3.2133	0.414903	3.25197	0.0569088	0.5	0.153753	356.799	1.73552	352.4	9.68299	323.532	72.9937	356.799	1.73552	110.282
8-54	1068.86	9934	2.67537	20.6212	2.9114	0.100676	3.482	0.015057	1.91	0.548535	96.3404	1.82642	97.4005	3.23391	123.408	68.593	96.3404	1.82642	78.0663
8-55	306.666	2136	2.21583	20.5943	8.05414	0.0589735	8.4789	0.00880852	2.65	0.312541	56.5347	1.49162	58.1815	4.79451	126.525	189.846	56.5347	1.49162	44.6827
8-56	106.353	864	2.77568	37.1714	52.4932	0.0276283	52.8652	0.0074484	6.26	0.118414	47.8375	2.98355	27.6728	14.4327	-1507.28	1853.02	47.8375	2.98355	-3.17376
8-57	772.256	8388	3.72166	22.172	5.95214	0.0710998	6.66543	0.0114333	3	0.450083	73.2857	2.18612	69.7425	4.49262	-50.1244	144.936	73.2857	2.18612	-146.208
8-58	150.446	16736	2.68894	12.6783	1.98306	2.13695	2.21199	0.196496	0.980003	0.443041	1156.47	10.375	1160.84	15.3015	1168.98	39.2919	1168.98	39.2919	98.9294
8-59	5784.57	13418	6.78172	20.8207	2.167	0.0713445	2.94888	0.0107735	2	0.678223	69.0787	1.3742	69.9745	1.99397	100.72	51.2528	69.0787	1.3742	68.585
8-60	408.899	3368	2.16386	23.4633	11.4458	0.0490936	11.5411	0.00835437	1.48	0.128237	53.632	0.790461	48.6639	5.48394	-189.755	286.956	53.632	0.790461	-28.2639
8-61	574.031	3642	3.21219	21.6337	6.97373	0.070188	7.13323	0.0110127	1.5	0.210284	70.6041	1.05328	68.8778	4.75031	9.32692	167.948	70.6041	1.05328	756.993
8-62	84.2264	330	3.22404	9.103	66.9335	0.143701	67.1126	0.00948729	4.90001	0.0730118	60.8707	2.96863	136.335	85.8248	1796.97	1413.57	60.8707	2.96863	3.38741
8-63	571.498	8194	5.47388	21.3844	6.11185	0.0979748	6.56618	0.0151953	2.4	0.365509	97.2187	2.31574	94.9052	5.94935	37.1181	146.382	97.2187	2.31574	261.917
8-64	718.943	14892	3.05736	20.6631	3.47902	0.161236	3.59606	0.0241633	0.91	0.253055	153.914	1.38403	151.785	5.06994	118.665	82.0445	153.914	1.38403	129.705
8-65	607.5	5636	3.41852	21.8027	9.37081	0.0599047	9.66832	0.00947262	2.38	0.246165	60.777	1.4397	59.074	5.54855	-9.40628	226.686	60.777	1.4397	-646.132
8-66	213.231	7216	4.86253	21.1685	6.87946	0.187871	7.13171	0.0288435	1.88	0.263611	183.306	3.39763	174.811	11.4534	61.3583	164.059	183.306	3.39763	298.748
8-67	485.902	19992	2.20237	18.9723	2.51037	0.342592	4.59614	0.0471408	3.85	0.83766	296.943	11.173	299.134	11.909	316.238	57.0948	296.943	11.173	93.8987
8-68	345.567	3266	3.9207	18.553	5.0465	0.17095	5.29105	0.0230028	1.59	0.300507	146.606	2.30473	160.243	7.84352	366.837	113.81	146.606	2.30473	39.9648
8-69	570.905	7350	2.91562	22.4747	6.17838	0.0613855	6.24504	0.0100059	0.91	0.145716	64.1818	0.581157	60.4915	3.66741	-83.2251	151.415	64.1818	0.581157	-77.1183
8-70	2102.58	17118	4.42041	20.4833	2.82088	0.069224	3.03142	0.0102838	1.11	0.366166	65.9553	0.728371	67.9627	1.9928	139.22	66.2751	65.9553	0.728371	47.375
8-71	187.338	2864	1.69728	21.3418	16.1122	0.0962473	16.1525	0.0148977	1.14	0.0705774	95.3284	1.07875	93.3064	14.4005	41.8887	387.418	95.3284	1.07875	227.576
8-72	197.563	2278	4.13298	20.2078	18.3354	0.0645986	18.6318	0.00946759	3.31	0.177653	60.7449	2.00121	63.5607	11.48	170.898	431.183	60.7449	2.00121	35.5446
8-73	99.5175	2318	3.7958	24.6476	17.9167	0.110549	18.478	0.0197619	4.52	0.244615	126.151	5.6466	106.468	18.6789	-314.412	462.263	126.151	5.6466	-40.1229
8-74	333.414	5612	3.39364	19.9418	8.91046	0.103049	9.22542	0.0149041	2.39	0.259067	95.3692	2.26255	99.5868	8.75135	201.77	207.188	95.3692	2.26255	47.2664
8-75	596.705	17974	8.94884	20.896	3.86809	0.16118	4.39661	0.0244271	2.09	0.475366	155.575	3.2126	151.736	6.19676	92.1755	91.6488	155.575	3.2126	168.781
8-76	154.794	1596	3.67592	24.1479	17.4496	0.0542784	18.4105	0.00950615	5.87	0.318841	60.9911	3.5633	53.6696	9.62451	-262.18	445.409	60.9911	3.5633	-23.2631
8-77	305.342	6790	10.5117	21.1325	5.95723	0.162609	6.14074	0.0249227	1.49	0.242642	158.692	2.33565	152.984	8.72111	65.4326	141.93	158.692	2.33565	242.528
8-78	249.438	2496	2.4908	19.828	6.79497	0.0914543	7.61612	0.0131517	3.44	0.451674	84.2288	2.87862	88.8572	6.4799	215.03	157.522	84.2288	2.87862	39.1707
8-79	313.319	2830	4.21698	24.9566	18.8164	0.0516106	19.1672	0.00934163	3.65	0.19043	59.9405	2.17769	51.097	9.55178	-346.45	488.948	59.9405	2.17769	-17.3014
8-80	921.549	10720	7.98902	20.763	4.36942	0.0561881	5.4937	0.00846121	3.33	0.606149	54.315	1.80109	55.5073	2.96756	107.291	103.239	54.315	1.80109	50.6239
8-81	505.701	7692	1.75577	20.8369	5.41631	0.0864992	5.54765	0.0130721	1.2	0.216308	83.722	0.998168	84.237	4.48461	98.866	128.207	83.722	0.998168	84.6823
8-82	91.3584	21480	1.88786	8.29605	1.57117	5.10961	2.19305	0.307438	1.53	0.697658	1728.09	23.1925	1837.7	18.6252	1964.2	28.0297	1964.2	28.0297	87.979
8-83	261.34	5660	6.44902	18.5912	16.7018	0.224339	16.9202	0.030249	2.71	0.160163	192.106	5.12928	205.514	31.4904	362.196	379.035	192.106	5.12928	53.0393
8-84	302.352	7512	2.22568	20.8358	3.56459	0.162148	4.17836	0.024503	2.18	0.521736	156.053	3.3611	152.582	5.91958	98.9962	84.3599	156.053	3.3611	157.635
8-85	401.893	2610	3.91943	21.0782	5.18433	0.0967729	5.23974	0.014794	0.76	0.145045	94.6697	0.714233	93.7931	4.6944	71.5776	123.359	94.6697	0.714233	132.262
8-86	346.868	2618	2.52218	19.7502	11.4855	0.087898	11.6304	0.0125907	1.83	0.157347	80.6581	1.46685	85.5434	9.54173	224.123	266.29	80.6581	1.46685	35.9884
8-87	1730.58	11792	3.67074	21.7186	2.78294	0.0660214	2.91876	0.0103996	0.88	0.301498	66.6937	0.583879	64.9169	1.83547	-0.0791686	67.0929	66.6937	0.583879	-84242.6
8-88	177.331	23170	2.80327	13.5831	2.05252	1.72657	2.2452	0.170091	0.91	0.405309	1012.61	8.52748	1018.47	14.4372	1031.08	41.5106	1031.08	41.5106	98.2087
8-89	542.867	8940	5.11283	21.6879	6.22955	0.0940302	6.39381	0.0147905	1.44	0.225218	94.6477	1.35297	91.2508	5.57998	3.31638	150.186	94.6477	1.35297	2853.94
8-90	117.365	1734	2.28019	24.3621	23.2415	0.0703819	23.6215	0.0124358	4.22	0.178651	79.6721	3.34147	69.0618	15.7723	-284.636	598.877	79.6721	3.34147	-27.9909
8-91	2388.03	1492	1.72704	23.9957	14.7056	0.00575874	15.0519	0.00100221	3.21	0.213263	6.45743	0.20718	5.83055	0.875092	-246.165	373.481	6.45743	0.20718	-2.62321
9 - Beluga Formation (Kachemak Bay, Kenai Peninsula)
							Isotope ratios						Apparent ages (Ma)
Analysis	U	206Pb	U/Th	206Pb*	±	207Pb*	±	206Pb*	±	error	206Pb*	±	207Pb*	±	206Pb*	±	Best age	±	Conc
	(ppm)	204Pb		207Pb*	(%)	235U*	(%)	238U	(%)	corr.	238U*	(Ma)	235U	(Ma)	207Pb*	(Ma)	(Ma)	(Ma)	(%)
9-1	366	3188	2.4	20.9786	17	0.0764	17.1	0.0116	0.9	0.05	74.5	0.7	74.8	12.3	82.8	406.9	74.5	0.7	90
9-2	282	356	2.7	16.8985	146.3	0.0073	148.8	0.0009	26.6	0.18	5.8	1.5	7.4	10.9	573.6	951.2	5.8	1.5	1
9-3	143	3052	1.5	22.4879	14.8	0.149	15.1	0.0243	3	0.2	154.8	4.5	141	19.9	-84.7	364.9	154.8	4.5	-182.8
9-4	98	2188	2.5	22.0788	13.2	0.1396	13.2	0.0224	0.8	0.06	142.6	1.2	132.7	16.4	-39.9	321	142.6	1.2	-357.5
9-5	130	216	2.3	33.1725	79.7	0.0049	81.1	0.0012	14.6	0.18	7.5	1.1	4.9	4	-1144	1166.2	7.5	1.1	-0.7
9-6	76	1628	1.4	18.8423	36.2	0.1539	36.3	0.021	2.8	0.08	134.2	3.8	145.4	49.2	331.9	845.7	134.2	3.8	40.4
9-7	96	1844	1.5	20.3116	18.1	0.1535	18.3	0.0226	2.2	0.12	144.1	3.1	145	24.7	159	427.5	144.1	3.1	90.7
9-8	1468	7988	3.2	20.6178	2.8	0.0714	2.9	0.0107	0.5	0.18	68.5	0.3	70	1.9	123.8	66.2	68.5	0.3	55.3
9-9	150	3580	2.2	25.49	24.4	0.117	24.6	0.0216	2.7	0.11	137.9	3.6	112.3	26.2	-401.3	645.6	137.9	3.6	-34.4
9-10	510	5924	2	22.1824	8.6	0.0693	8.7	0.0111	1	0.11	71.4	0.7	68	5.7	-51.3	210.2	71.4	0.7	-139.4
9-11	145	1480	1.8	24.6897	24.7	0.0601	24.8	0.0108	2.3	0.09	69	1.6	59.3	14.3	-318.8	640.7	69	1.6	-21.6
9-12	121	1596	2.6	30.4694	43.2	0.038	43.3	0.0084	2.4	0.06	53.9	1.3	37.9	16.1	-891.1	1300.6	53.9	1.3	-6.1
9-13	123	1480	2	25.2758	39	0.0603	39.2	0.0111	3.5	0.09	70.8	2.5	59.4	22.6	-379.3	1046.6	70.8	2.5	-18.7
9-14	95	2200	2.8	22.3512	13.6	0.1403	13.7	0.0227	1.5	0.11	144.9	2.1	133.3	17.1	-69.8	334.3	144.9	2.1	-207.8
9-15	112	2548	5	21.741	11.9	0.1514	12.2	0.0239	2.9	0.24	152.1	4.4	143.2	16.4	-2.6	287.7	152.1	4.4	-5916.3
9-16	227	5388	4	20.4232	6.4	0.1823	6.5	0.027	1	0.16	171.7	1.7	170	10.1	146.1	149.8	171.7	1.7	117.5
9-17	101	2168	2.7	26.1119	28.3	0.1124	28.4	0.0213	2.9	0.1	135.8	3.9	108.2	29.2	-464.6	759.2	135.8	3.9	-29.2
9-18	116	2556	2.3	21.7086	9.9	0.1458	10	0.023	1.3	0.13	146.3	1.9	138.2	12.9	1	239.5	146.3	1.9	14367.5
9-19	342	3984	2.9	22.8535	12.1	0.0877	12.3	0.0145	2.3	0.18	93.1	2.1	85.4	10.1	-124.3	299.3	93.1	2.1	-74.9
9-20	675	4536	1.5	22.41	8.2	0.054	8.3	0.0088	1.2	0.15	56.3	0.7	53.4	4.3	-76.2	200.7	56.3	0.7	-74
9-21	145	2808	1.7	18.3464	8.1	0.1675	8.2	0.0223	1.2	0.14	142.1	1.6	157.2	12	392	182.6	142.1	1.6	36.2
9-22	63	676	1.7	12.8691	28	0.2705	28	0.0252	2.2	0.08	160.7	3.5	243.1	60.7	1139.4	566.8	160.7	3.5	14.1
9-23	299	11192	2.9	20.4577	5.4	0.2166	6.1	0.0321	2.9	0.47	203.9	5.8	199.1	11.1	142.1	126.6	203.9	5.8	143.4
9-24	117	1524	3.5	20.459	39.9	0.0703	40.5	0.0104	7.1	0.17	66.9	4.7	68.9	27	142	970.2	66.9	4.7	47.1
9-25	110	1364	1.9	19.2601	25.9	0.0712	26.2	0.01	4	0.15	63.8	2.5	69.9	17.7	281.9	601.4	63.8	2.5	22.6
9-26	135	2004	2.5	27.9616	32.9	0.0648	32.9	0.0131	1.5	0.05	84.1	1.3	63.7	20.3	-649	923.5	84.1	1.3	-13
9-27	113	1544	2.3	26.1406	84.8	0.057	84.9	0.0108	3.2	0.04	69.3	2.2	56.3	46.5	-467.5	2843.1	69.3	2.2	-14.8
9-28	696	8336	2.2	20.9111	6.7	0.0703	6.8	0.0107	0.7	0.1	68.3	0.5	68.9	4.5	90.4	159.5	68.3	0.5	75.5
9-29	70	808	2.3	26.691	59.8	0.0475	60	0.0092	4.6	0.08	59	2.7	47.1	27.6	-522.9	1741.8	59	2.7	-11.3
9-30	137	3160	2.3	20.8547	17.9	0.1336	18.1	0.0202	2.4	0.13	129	3	127.3	21.6	96.8	426.9	129	3	133.2
9-31	315	2536	7	23.9652	17.3	0.0492	17.5	0.0085	2.3	0.13	54.9	1.3	48.7	8.3	-243	440.8	54.9	1.3	-22.6
9-32	79	1916	1.9	24.4504	64.1	0.1249	64.1	0.0222	1.1	0.02	141.2	1.6	119.5	72.4	-293.9	1815.6	141.2	1.6	-48.1
9-33	283	2784	2.1	22.8375	11.6	0.0649	12.1	0.0108	3.4	0.28	69	2.4	63.9	7.5	-122.6	287.8	69	2.4	-56.2
9-34	182	10632	1.7	18.8535	3.8	0.3795	4.3	0.0519	2	0.45	326.1	6.2	326.7	12	330.5	87	326.1	6.2	98.7
9-35	132	288	2.4	18.2048	94.4	0.0128	94.7	0.0017	6.4	0.07	10.9	0.7	12.9	12.1	409.4	673.8	10.9	0.7	2.7
9-36	109	2824	2.9	24.1622	19.7	0.1186	19.8	0.0208	2.4	0.12	132.7	3.1	113.8	21.4	-263.7	504	132.7	3.1	-50.3
9-37	51	200	4.1	13.7348	46.4	0.0091	48.8	0.0009	15.3	0.31	5.8	0.9	9.2	4.5	1008.6	995.4	5.8	0.9	0.6
9-38	166	4072	3.7	19.4063	8.8	0.1653	8.8	0.0233	0.5	0.06	148.3	0.8	155.3	12.7	264.6	202.6	148.3	0.8	56
9-39	100	1316	1.7	16.9787	20.1	0.1044	20.2	0.0129	1.6	0.08	82.3	1.3	100.8	19.4	563.3	441.8	82.3	1.3	14.6
9-40	147	256	2	16.4788	110.2	0.0033	121.8	0.0004	51.9	0.43	2.6	1.3	3.4	4.1	628	639.1	2.6	1.3	0.4
9-41	363	508	3.1	25.0567	64.4	0.0059	65.5	0.0011	11.8	0.18	6.9	0.8	5.9	3.9	-356.8	1850.6	6.9	0.8	-1.9
9-42	86	2332	2	17.7859	30.4	0.1549	30.6	0.02	3.2	0.1	127.5	4.1	146.2	41.7	461.2	689.1	127.5	4.1	27.7
9-43	128	1844	2.6	27.5951	52.6	0.0536	52.6	0.0107	1.2	0.02	68.8	0.8	53	27.2	-612.9	1525	68.8	0.8	-11.2
9-44	453	4936	3.1	19.6944	9.7	0.0712	9.7	0.0102	0.5	0.05	65.3	0.3	69.9	6.5	230.6	224.1	65.3	0.3	28.3
9-45	436	4000	5.3	21.5738	6	0.0478	6	0.0075	0.9	0.15	48	0.4	47.4	2.8	16	143.1	48	0.4	300
9-46	147	1708	1.9	15.1526	26	0.1067	26.3	0.0117	3.7	0.14	75.1	2.7	102.9	25.7	806.2	554	75.1	2.7	9.3
9-47	507	1484	3.9	13.04	19.9	0.0607	20	0.0057	1.5	0.08	36.9	0.6	59.8	11.6	1113.1	402.1	36.9	0.6	3.3
9-48	267	3164	2.5	24.7124	18.9	0.057	19.2	0.0102	3.3	0.17	65.5	2.2	56.3	10.5	-321.1	489.6	65.5	2.2	-20.4
9-49	1011	10536	5.4	21.2032	5.3	0.0647	5.4	0.01	1	0.18	63.8	0.6	63.7	3.3	57.4	126.4	63.8	0.6	111.1
9-50	1827	16408	1.9	21.3037	2.5	0.0551	2.7	0.0085	1	0.37	54.6	0.5	54.5	1.4	46.2	59.9	54.6	0.5	118.3
9-51	75	1696	2.8	22.4094	14.6	0.1304	15	0.0212	3.5	0.23	135.2	4.6	124.5	17.6	-76.1	359.1	135.2	4.6	-177.6
9-52	235	3220	2.7	22.93	12.7	0.09	12.7	0.015	0.8	0.06	95.7	0.7	87.5	10.6	-132.6	314.6	95.7	0.7	-72.2
9-53	431	3260	2.1	21.5318	13.1	0.0542	13.1	0.0085	0.7	0.05	54.4	0.4	53.6	6.9	20.7	315.9	54.4	0.4	262.9
9-54	1201	15488	2.5	20.6189	2.4	0.1025	2.7	0.0153	1.2	0.45	98.1	1.2	99.1	2.5	123.7	56.1	98.1	1.2	79.3
9-55	161	1748	1.6	22.5813	13.8	0.0768	14.5	0.0126	4.4	0.31	80.6	3.5	75.1	10.5	-94.8	340.1	80.6	3.5	-85
9-56	272	2000	2.5	23.9443	17.9	0.0528	17.9	0.0092	1.2	0.07	58.9	0.7	52.3	9.1	-240.8	455.2	58.9	0.7	-24.5
9-57	123	1372	1.8	18.3823	27.7	0.1056	27.7	0.0141	1.3	0.05	90.1	1.2	101.9	26.9	387.6	632.3	90.1	1.2	23.2
9-58	224	3032	1.3	21.8902	9.2	0.0819	10	0.013	3.9	0.39	83.2	3.2	79.9	7.7	-19.1	223	83.2	3.2	-436.1
9-59	223	3556	2.5	24.2221	33.3	0.074	33.4	0.013	1.9	0.06	83.2	1.6	72.5	23.3	-270	866.4	83.2	1.6	-30.8
9-60	130	1172	3.1	21.4514	12.1	0.0697	12.4	0.0108	2.6	0.21	69.5	1.8	68.4	8.2	29.7	291.3	69.5	1.8	234.4
9-61	46	736	3.1	16.1103	119.5	0.1017	119.8	0.0119	8.7	0.07	76.1	6.6	98.3	112.8	676.6	672.3	76.1	6.6	11.3
9-62	105	2144	3.7	19.5047	15.5	0.1652	15.6	0.0234	1.5	0.09	148.9	2.1	155.2	22.4	253	358.3	148.9	2.1	58.8
9-63	81	2116	2	22.0774	18.1	0.152	18.1	0.0243	1	0.05	155	1.5	143.7	24.3	-39.7	442.7	155	1.5	-390.3
9-64	119	2764	1.9	19.9881	13.6	0.1544	13.8	0.0224	2.3	0.16	142.7	3.2	145.7	18.7	196.4	317	142.7	3.2	72.6
9-65	168	2560	1.7	20.2318	13.8	0.1238	13.8	0.0182	1.2	0.08	116.1	1.3	118.6	15.5	168.1	322.9	116.1	1.3	69.1
9-66	441	2588	2.7	24.2995	18.5	0.0348	18.5	0.0061	1.7	0.09	39.5	0.7	34.8	6.3	-278.1	473.3	39.5	0.7	-14.2
9-67	516	3176	2.2	14.2713	9.3	0.4565	9.3	0.0473	0.5	0.05	297.6	1.5	381.8	29.6	930.4	191.3	297.6	1.5	32
9-68	101	2136	3	17.2587	10.1	0.1831	10.2	0.0229	1.2	0.12	146	1.7	170.7	16	527.6	222	146	1.7	27.7
9-69	297	1832	2	25.0311	27.8	0.027	28.1	0.0049	3.6	0.13	31.5	1.1	27	7.5	-354.1	731.1	31.5	1.1	-8.9
9-70	291	3320	3.3	22.1469	9.2	0.0729	9.4	0.0117	2.1	0.22	75	1.6	71.4	6.5	-47.4	223.8	75	1.6	-158.4
9-71	547	592	2.1	27.4479	40.3	0.0055	40.7	0.0011	5.1	0.13	7	0.4	5.5	2.2	-598.3	1134.4	7	0.4	-1.2
9-72	707	29356	2	19.0493	2.7	0.3033	8.4	0.0419	8	0.95	264.7	20.7	269	19.9	307	60.6	264.7	20.7	86.2
9-73	337	7144	1.8	21.2892	7.9	0.1456	8	0.0225	1.4	0.17	143.4	1.9	138.1	10.4	47.8	189.6	143.4	1.9	300
9-74	370	6208	5	20.698	4.2	0.1014	4.4	0.0152	1.3	0.29	97.4	1.2	98.1	4.1	114.6	98.3	97.4	1.2	85
9-75	601	5004	6.2	19.6671	8.3	0.0758	8.3	0.0108	1.2	0.14	69.3	0.8	74.2	6	233.9	191.1	69.3	0.8	29.6
9-76	138	1364	3	24.5693	31	0.0559	31.4	0.01	5.3	0.17	63.9	3.3	55.2	16.9	-306.3	808.3	63.9	3.3	-20.9
9-77	517	5404	2.5	21.0723	7.3	0.0675	7.4	0.0103	1	0.13	66.2	0.6	66.4	4.7	72.2	174.2	66.2	0.6	91.7
9-78	118	2628	2.6	22.5378	14.4	0.1379	14.7	0.0225	2.9	0.2	143.7	4.1	131.2	18.1	-90.1	354.4	143.7	4.1	-159.5
9-79	468	3840	7.6	22.2096	14.8	0.0499	14.9	0.008	2.1	0.14	51.6	1.1	49.4	7.2	-54.3	362.3	51.6	1.1	-95.1
9-80	217	488	4.1	23.8993	77.8	0.0066	78.7	0.0011	11.5	0.15	7.4	0.8	6.7	5.2	-236	2355.6	7.4	0.8	-3.1
9-81	561	7028	4.6	22.8076	11.1	0.0569	11.2	0.0094	1.4	0.13	60.3	0.9	56.2	6.1	-119.4	273.6	60.3	0.9	-50.6
9-82	373	7916	4	20.3928	6.5	0.1664	6.7	0.0246	1.2	0.18	156.7	1.9	156.2	9.6	149.6	153.6	156.7	1.9	104.8
9-83	95	2112	1.8	20.8611	20.2	0.1589	20.3	0.024	1.4	0.07	153.1	2.2	149.7	28.2	96.1	482.7	153.1	2.2	159.3
9-84	980	6992	4.9	20.0394	9.7	0.0568	9.7	0.0083	0.6	0.06	53	0.3	56.1	5.3	190.4	225.9	53	0.3	27.8
9-85	96	2608	1.7	22.5472	14.3	0.1423	14.5	0.0233	2.3	0.16	148.3	3.3	135.1	18.3	-91.1	351.8	148.3	3.3	-162.8
9-86	1053	8524	4.8	20.5283	5.2	0.0693	5.4	0.0103	1.3	0.25	66.1	0.9	68	3.5	134	122.3	66.1	0.9	49.3
9-87	272	3208	2.7	21.5231	16.3	0.0687	16.4	0.0107	1.5	0.09	68.7	1	67.4	10.7	21.6	394.1	68.7	1	317.7
9-88	139	4128	3.1	20.1559	13.4	0.1657	13.4	0.0242	1	0.08	154.3	1.6	155.7	19.3	176.9	312.8	154.3	1.6	87.2
9-89	572	5508	2.6	21.8236	7.9	0.0714	8.3	0.0113	2.5	0.3	72.5	1.8	70	5.6	-11.7	191.5	72.5	1.8	-618
9-90	257	47792	2.9	12.5892	1.7	2.1516	2.7	0.1965	2	0.76	1156.3	21.4	1165.6	18.5	1183	34.4	1183	34.4	97.7
9-91	184	5488	3	18.4578	14.1	0.1691	14.2	0.0226	2	0.14	144.3	2.9	158.6	20.9	378.4	317.6	144.3	2.9	38.1
9-92	668	5324	3.4	18.8545	9.9	0.0649	10	0.0089	1.3	0.13	56.9	0.8	63.8	6.2	330.4	225.5	56.9	0.8	17.2
9-93	114	1196	2.2	32.7909	49.1	0.0518	49.7	0.0123	7.9	0.16	78.9	6.2	51.2	24.9	-1108.8	1569.9	78.9	6.2	-7.1
9-94	505	3508	3.5	23.0412	11.8	0.0515	12	0.0086	1.9	0.16	55.2	1	51	5.9	-144.6	293.6	55.2	1	-38.2
9-95	74	1604	2.4	25.9116	29.9	0.1144	30.1	0.0215	3	0.1	137.1	4.1	110	31.4	-444.3	802.3	137.1	4.1	-30.9
9-96	158	4440	2.7	21.1035	12	0.1544	12.1	0.0236	1.8	0.15	150.5	2.7	145.8	16.5	68.7	286.5	150.5	2.7	219.2
9-97	1064	11620	4.9	20.328	3.1	0.0785	3.2	0.0116	0.8	0.26	74.1	0.6	76.7	2.4	157.1	73.2	74.1	0.6	47.2
9-98	311	1864	2.6	14.8553	15.4	0.1033	15.6	0.0111	2.3	0.15	71.3	1.6	99.8	14.8	847.6	322.4	71.3	1.6	8.4
9-99	1031	15500	3.3	20.8173	3.2	0.1012	3.5	0.0153	1.3	0.37	97.7	1.3	97.9	3.3	101.1	76.7	97.7	1.3	96.7
9-100	387	3652	3.5	19.7904	19.1	0.073	19.3	0.0105	2.7	0.14	67.2	1.8	71.6	13.4	219.4	446.7	67.2	1.8	30.6
9-101	271	2948	3.9	21.3825	10.2	0.0744	10.4	0.0115	2.1	0.2	74	1.5	72.9	7.3	37.3	244.1	74	1.5	198.1
9-102	154	1740	2.3	17.0826	11.6	0.0877	12.3	0.0109	4.1	0.33	69.6	2.8	85.3	10.1	550	254.8	69.6	2.8	12.7
9-103	96	2352	3.1	19.617	26	0.153	26.4	0.0218	4.7	0.18	138.8	6.4	144.6	35.6	239.7	607.3	138.8	6.4	57.9
10 - Tyonek Formation (Barabara Point, Kenai Peninsula)
							Isotope ratios						Apparent ages (Ma)
Analysis	U	206Pb	U/Th	206Pb*	±	207Pb*	±	206Pb*	±	error	206Pb*	±	207Pb*	±	206Pb*	±	Best age	±	Conc
	(ppm)	204Pb		207Pb*	(%)	235U*	(%)	238U	(%)	corr.	238U*	(Ma)	235U	(Ma)	207Pb*	(Ma)	(Ma)	(Ma)	(%)
10-1	283	4866	1.7	20.3034	7	0.2239	7.3	0.033	1.9	0.26	209.1	3.9	205.1	13.5	159.9	164.5	209.1	3.9	130.8
10-2	1246	5784	1	19.5318	5.2	0.1158	5.5	0.0164	2	0.36	104.9	2.1	111.2	5.8	249.8	119.2	104.9	2.1	42
10-3	818	7862	1.6	19.9744	3.9	0.1317	4	0.0191	1.1	0.26	121.9	1.3	125.7	4.8	198	90.7	121.9	1.3	61.6
10-4	340	6636	9.6	20.7859	6.5	0.173	6.7	0.0261	1.5	0.23	166	2.5	162	10.1	104.6	154.6	166	2.5	158.6
10-5	213	1350	2.6	19.8965	21.3	0.0608	21.4	0.0088	2	0.09	56.3	1.1	59.9	12.5	207.1	499.5	56.3	1.1	27.2
10-6	447	18162	2.3	18.3892	3.4	0.4526	4.1	0.0604	2.4	0.58	377.8	8.9	379.1	13.1	386.8	75.6	377.8	8.9	97.7
10-7	810	21478	2.4	19.4872	1.3	0.2948	2	0.0417	1.5	0.76	263.1	3.9	262.3	4.6	255	29.6	263.1	3.9	103.2
10-8	267	1258	4.2	21.3488	16.9	0.0502	17	0.0078	2.4	0.14	49.9	1.2	49.8	8.3	41.2	405.6	49.9	1.2	121.3
10-9	1077	4860	2.4	20.6174	4.8	0.0654	5.2	0.0098	2.1	0.4	62.7	1.3	64.3	3.2	123.8	112.4	62.7	1.3	50.6
10-10	360	5554	3.7	19.3141	7.6	0.2177	7.6	0.0305	0.5	0.07	193.7	1	200	13.8	275.5	173.9	193.7	1	70.3
10-11	198	4498	2.2	19.185	5.6	0.2375	5.7	0.0331	0.8	0.14	209.6	1.7	216.4	11	290.8	128.1	209.6	1.7	72.1
10-12	1939	16162	3.2	19.7689	5.6	0.1418	5.7	0.0203	1.1	0.19	129.8	1.4	134.6	7.2	222	130.1	129.8	1.4	58.5
10-13	756	4430	5.6	20.4545	4.9	0.0785	4.9	0.0116	0.7	0.13	74.6	0.5	76.7	3.6	142.5	114.9	74.6	0.5	52.4
10-14	1404	16458	2.8	20.5547	3.9	0.1261	4.1	0.0188	1.1	0.27	120.1	1.3	120.6	4.6	131.1	92.5	120.1	1.3	91.6
10-15	592	5246	1.5	19.8286	3.2	0.1748	3.3	0.0251	0.5	0.15	160	0.8	163.6	4.9	215	74.6	160	0.8	74.5
10-16	1009	15502	4.9	19.8543	1.9	0.1999	2.1	0.0288	0.7	0.34	183	1.3	185.1	3.5	211.9	45.1	183	1.3	86.3
10-17	132	3398	2.3	20.4329	10.4	0.1866	10.4	0.0277	0.7	0.06	175.8	1.1	173.7	16.6	145	243.8	175.8	1.1	121.3
10-18	236	2002	4.9	17.0781	19.9	0.0978	20	0.0121	2.4	0.12	77.6	1.8	94.7	18.1	550.6	438.2	77.6	1.8	14.1
10-19	312	3782	2	20.5708	7.4	0.1692	7.5	0.0252	1.2	0.15	160.7	1.8	158.7	11	129.2	174.4	160.7	1.8	124.3
10-20	228	3926	2.1	20.82	4.9	0.1782	4.9	0.0269	0.7	0.15	171.2	1.2	166.5	7.6	100.8	115.6	171.2	1.2	169.9
10-21	893	12870	6.1	21.1685	3.5	0.1061	3.6	0.0163	0.8	0.23	104.1	0.8	102.4	3.5	61.4	83.2	104.1	0.8	169.7
10-22	219	1732	2.2	19.067	9.7	0.069	10.3	0.0095	3.5	0.33	61.2	2.1	67.8	6.8	304.9	222.3	61.2	2.1	20.1
10-23	418	8658	3.1	20.1258	5.1	0.154	5.2	0.0225	0.6	0.11	143.3	0.8	145.4	7	180.4	119.6	143.3	0.8	79.5
10-24	184	2260	3	18.9679	8	0.2273	8.1	0.0313	1.7	0.2	198.4	3.3	207.9	15.3	316.8	181.6	198.4	3.3	62.6
10-25	69	892	4.6	15.1469	16.6	0.1798	17.6	0.0197	5.8	0.33	126.1	7.2	167.8	27.2	807	349.2	126.1	7.2	15.6
10-26	1293	17656	2.6	20.4237	2.1	0.1206	2.6	0.0179	1.5	0.58	114.1	1.7	115.6	2.8	146.1	49.9	114.1	1.7	78.1
10-27	389	5024	2.4	21.5016	8.3	0.1081	8.4	0.0169	1.3	0.15	107.8	1.4	104.3	8.3	24	199.7	107.8	1.4	448.6
10-28	197	1144	4.2	13.9074	20.2	0.2824	20.2	0.0285	0.5	0.02	181.1	0.9	252.6	45.2	983.2	415.4	181.1	0.9	18.4
10-29	115	1512	2.7	22.9289	12	0.1127	12	0.0187	1.2	0.1	119.7	1.4	108.4	12.4	-132.5	296.8	119.7	1.4	-90.4
10-30	1102	11008	2	20.8708	1.8	0.1202	2.2	0.0182	1.2	0.53	116.3	1.3	115.3	2.4	95	43.8	116.3	1.3	122.4
10-31	100	1490	2.4	17.6236	19.7	0.1405	19.9	0.018	2.6	0.13	114.8	2.9	133.5	24.8	481.5	438.8	114.8	2.9	23.8
10-32	385	2044	5.5	19.8759	13	0.0672	13.1	0.0097	1.4	0.11	62.1	0.9	66	8.4	209.4	303.5	62.1	0.9	29.7
10-33	101	1104	2.7	27.3617	26.4	0.0874	26.7	0.0173	3.8	0.14	110.9	4.1	85.1	21.8	-589.8	727.3	110.9	4.1	-18.8
10-34	177	212	2.2	6.5084	20.1	0.4456	20.3	0.021	2.8	0.14	134.2	3.7	374.2	63.7	2386.9	346.5	2386.9	346.5	5.6
10-35	108	10238	3.2	13.638	2.3	1.2213	7.5	0.1208	7.1	0.95	735.2	49.3	810.4	41.7	1022.9	46.1	735.2	49.3	71.9
10-36	557	2264	2.8	21.5191	7.9	0.0529	7.9	0.0083	0.5	0.06	53	0.3	52.4	4	22.1	189.5	53	0.3	240.1
10-37	112	1600	2.9	20.5725	9.6	0.164	9.7	0.0245	0.7	0.07	155.8	1.1	154.2	13.8	129	226.9	155.8	1.1	120.8
10-38	398	7962	2.1	21.1775	4.4	0.1397	4.7	0.0215	1.9	0.39	136.9	2.5	132.8	5.9	60.4	103.8	136.9	2.5	226.7
10-39	1286	9204	2.9	18.8527	18.7	0.1148	19	0.0157	3.5	0.18	100.4	3.5	110.3	19.9	330.6	427.2	100.4	3.5	30.4
10-40	1189	7332	2.7	22.1095	7.4	0.0631	8	0.0101	3.3	0.41	64.9	2.1	62.1	4.8	-43.3	179	64.9	2.1	-150
10-41	273	3454	3.3	21.3746	7.3	0.1728	7.3	0.0268	0.8	0.11	170.4	1.3	161.8	10.9	38.2	174.1	170.4	1.3	445.8
10-42	648	2382	2.3	19.8786	5.9	0.1186	6	0.0171	0.5	0.08	109.3	0.5	113.8	6.4	209.1	137.8	109.3	0.5	52.2
10-43	814	19944	2.1	20.0872	2.3	0.1821	2.5	0.0265	1	0.39	168.8	1.6	169.8	4	184.8	54.2	168.8	1.6	91.3
10-44	753	11554	6.5	19.2122	4.5	0.2396	4.6	0.0334	0.8	0.17	211.7	1.6	218.1	8.9	287.6	102.6	211.7	1.6	73.6
10-45	119	2706	2.9	21.1838	12.9	0.1966	13	0.0302	1.3	0.1	191.8	2.4	182.2	21.6	59.7	308.8	191.8	2.4	321.3
10-46	576	12418	7.7	20.3284	4.6	0.1866	4.7	0.0275	0.8	0.17	174.9	1.4	173.7	7.4	157	107.4	174.9	1.4	111.4
10-47	381	1410	3.2	19.5206	13.1	0.067	13.1	0.0095	0.5	0.04	60.9	0.3	65.9	8.4	251.1	302.5	60.9	0.3	24.2
10-48	190	2688	3.1	20.3122	7.4	0.1767	7.4	0.026	1	0.14	165.7	1.7	165.3	11.3	158.9	172.2	165.7	1.7	104.3
10-49	238	1192	4.5	22.539	14.6	0.0498	14.6	0.0081	1.3	0.09	52.3	0.7	49.4	7	-90.2	358.7	52.3	0.7	-58
10-50	266	820	2.1	26.2385	42.3	0.0456	42.6	0.0087	4.7	0.11	55.7	2.6	45.3	18.8	-477.4	1165.6	55.7	2.6	-11.7
10-51	1727	20836	1.7	21.0878	2.8	0.1189	2.9	0.0182	0.6	0.21	116.2	0.7	114.1	3.1	70.5	67.5	116.2	0.7	164.9
10-52	251	3982	3	20.5786	7.9	0.1863	8	0.0278	0.8	0.1	176.8	1.4	173.5	12.7	128.3	186.6	176.8	1.4	137.8
10-53	889	4166	3.2	21.1118	10.9	0.0568	11	0.0087	1.5	0.14	55.8	0.8	56.1	6	67.8	260.2	55.8	0.8	82.3
10-54	601	7320	3.5	19.9243	14	0.0633	14.1	0.0091	1.6	0.11	58.7	0.9	62.3	8.5	203.8	325.5	58.7	0.9	28.8
10-55	128	2890	1.5	23.3816	16.6	0.1804	16.8	0.0306	2.4	0.14	194.3	4.6	168.4	26	-181	416.7	194.3	4.6	-107.3
10-56	2266	11666	3.7	20.4192	4.7	0.0617	7.2	0.0091	5.5	0.76	58.7	3.2	60.8	4.3	146.6	110.9	58.7	3.2	40
10-57	123	1160	1.5	22.0384	23.8	0.1143	24	0.0183	2.4	0.1	116.7	2.8	109.9	24.9	-35.4	585.4	116.7	2.8	-329.3
10-58	321	30772	1.9	9.509	2.4	3.7275	3.4	0.2571	2.3	0.69	1474.8	30.5	1577.3	26.8	1717.2	44.7	1717.2	44.7	85.9
10-59	473	1748	4.1	22.419	14.7	0.0637	14.7	0.0103	0.8	0.05	66.4	0.5	62.7	8.9	-77.2	360	66.4	0.5	-86
10-60	532	2298	2.8	21.6106	11.9	0.0525	13	0.0082	5.2	0.4	52.9	2.8	52	6.6	11.9	285.9	52.9	2.8	444
10-61	1367	11170	1.5	20.8679	2.3	0.1078	2.8	0.0163	1.6	0.57	104.3	1.6	103.9	2.7	95.4	54.3	104.3	1.6	109.4
10-62	633	6420	1.3	21.2183	4.7	0.1078	4.9	0.0166	1.5	0.31	106.1	1.6	104	4.9	55.8	112.1	106.1	1.6	190.2
10-63	1936	13600	8.4	21.1343	4.7	0.0675	5.1	0.0103	2.1	0.41	66.3	1.4	66.3	3.3	65.2	111.5	66.3	1.4	101.7
10-64	392	2878	1.4	20.1972	11.9	0.0866	12.2	0.0127	2.6	0.21	81.3	2.1	84.3	9.9	172.1	279.2	81.3	2.1	47.2
10-65	549	772	2.6	23.4631	42	0.0146	42.2	0.0025	4.9	0.12	16	0.8	14.7	6.2	-189.7	1091.2	16	0.8	-8.4
10-66	122	1670	2.8	22.2123	19	0.1299	19.4	0.0209	3.8	0.2	133.5	5	124	22.6	-54.5	466.5	133.5	5	-244.7
10-67	331	2890	3.3	17.675	17	0.1331	17	0.0171	1.1	0.07	109.1	1.2	126.9	20.3	475.1	377.9	109.1	1.2	23
10-68	2613	8144	4.3	21.0823	3.7	0.0472	4.7	0.0072	2.9	0.61	46.4	1.3	46.9	2.1	71.1	88.4	46.4	1.3	65.2
10-69	216	3014	2.6	18.8778	13.2	0.2357	13.3	0.0323	2.2	0.17	204.8	4.5	214.9	25.9	327.6	299.7	204.8	4.5	62.5
10-70	98	2426	3.2	24.5768	26.6	0.1806	27	0.0322	4.7	0.18	204.2	9.5	168.6	41.9	-307	690.2	204.2	9.5	-66.5
10-71	284	3236	3.3	18.2101	11.7	0.1921	12.1	0.0254	3	0.25	161.5	4.8	178.4	19.8	408.7	262.6	161.5	4.8	39.5
10-72	672	4392	3.1	23.3193	9.7	0.0621	9.9	0.0105	1.8	0.18	67.4	1.2	61.2	5.9	-174.4	243.4	67.4	1.2	-38.6
10-73	3023	1280	0.4	17.3438	7.5	0.0753	9	0.0095	5	0.56	60.7	3	73.7	6.4	516.7	165.3	60.7	3	11.8
10-74	2611	10732	1.8	20.559	5.9	0.0584	6.3	0.0087	2.3	0.36	55.9	1.3	57.7	3.6	130.5	139.4	55.9	1.3	42.8
10-75	256	3870	1.7	20.7798	6.4	0.2191	7.2	0.033	3.4	0.47	209.4	7	201.2	13.2	105.3	150.9	209.4	7	198.8
10-76	104	1416	2	20.7627	25.7	0.166	25.9	0.025	3.3	0.13	159.2	5.2	155.9	37.5	107.3	615.6	159.2	5.2	148.3
10-77	629	5254	5.4	21.0305	6.5	0.1031	7	0.0157	2.5	0.36	100.6	2.5	99.6	6.6	76.9	155.1	100.6	2.5	130.8
10-78	302	7846	2.4	19.9556	6.6	0.2279	6.7	0.033	0.8	0.12	209.2	1.7	208.5	12.6	200.1	154.2	209.2	1.7	104.5
10-79	926	6738	1.5	20.2871	5.3	0.1143	6.1	0.0168	3	0.5	107.5	3.2	109.9	6.3	161.8	123.2	107.5	3.2	66.5
10-80	1119	5082	1.6	20.2614	5.8	0.0546	5.8	0.008	0.5	0.09	51.6	0.3	54	3.1	164.7	135.9	51.6	0.3	31.3
10-81	267	6356	3.5	17.8548	6.4	0.3657	7.4	0.0474	3.6	0.49	298.3	10.6	316.5	20	452.6	142.3	298.3	10.6	65.9
10-82	147	2204	1.7	27.3555	27.1	0.1074	27.1	0.0213	1.6	0.06	135.9	2.2	103.6	26.7	-589.2	745.6	135.9	2.2	-23.1
10-83	290	4892	2.4	21.7317	8.1	0.1713	8.1	0.027	0.9	0.12	171.8	1.6	160.6	12.1	-1.5	195.1	171.8	1.6	-11218
10-84	290	424	1.3	33.672	82.6	0.009	82.8	0.0022	6.3	0.08	14.1	0.9	9.1	7.5	-1190	1280	14.1	0.9	-1.2
10-85	446	2298	2.7	22.2071	11	0.0551	11.2	0.0089	1.8	0.16	56.9	1	54.4	5.9	-54	269.3	56.9	1	-105.5
10-86	351	2910	1.9	21.9383	14.1	0.1008	14.3	0.016	2.9	0.2	102.6	3	97.5	13.3	-24.4	341.7	102.6	3	-420.3
10-87	1910	15570	9.4	20.4827	2.5	0.1075	3.4	0.016	2.2	0.67	102.1	2.3	103.7	3.3	139.3	58.8	102.1	2.3	73.3
10-88	229	1810	3.5	30.246	32.4	0.0386	32.6	0.0085	3.6	0.11	54.3	1.9	38.4	12.3	-869.8	953.3	54.3	1.9	-6.2
10-89	1574	8796	4.2	21.844	4.4	0.0546	5.4	0.0087	3.1	0.57	55.6	1.7	54	2.8	-14	106.4	55.6	1.7	-397.5
10-90	2161	1636	3.9	14.6171	2.6	0.433	7.6	0.0459	7.1	0.94	289.3	20.2	365.3	23.2	881.1	52.9	289.3	20.2	32.8
10-91	116	1092	2.3	17.6232	45.9	0.1489	45.9	0.019	1.9	0.04	121.5	2.2	140.9	60.5	481.6	1067.8	121.5	2.2	25.2
10-92	136	2828	3.3	18.1335	17	0.1877	17.8	0.0247	5.3	0.3	157.2	8.2	174.7	28.6	418.1	383.2	157.2	8.2	37.6
10-93	895	2456	2.1	15.4835	32.6	0.099	32.7	0.0111	1.2	0.04	71.3	0.9	95.9	29.9	760.8	706	71.3	0.9	9.4
10-94	1035	4658	12.1	22.395	6.5	0.0533	6.7	0.0087	1.6	0.23	55.6	0.9	52.8	3.4	-74.5	159	55.6	0.9	-74.6
10-95	86	1766	3	20.1658	27.6	0.2439	27.8	0.0357	2.8	0.1	226	6.2	221.6	55.3	175.7	655.5	226	6.2	128.6
10-96	198	1366	3.1	21.8099	36	0.0892	36.5	0.0141	5.8	0.16	90.3	5.2	86.7	30.4	-10.2	896	90.3	5.2	-884.9
10-97	132	2510	1.7	22.9826	15.9	0.2062	16	0.0344	1.7	0.11	217.9	3.6	190.4	27.8	-138.3	395.9	217.9	3.6	-157.6
10-98	329	7008	3	19.412	6.3	0.2275	6.5	0.032	1.8	0.27	203.3	3.5	208.2	12.3	263.9	144.5	203.3	3.5	77
10-99	431	1804	3.7	22.8418	39.2	0.055	39.3	0.0091	2.4	0.06	58.5	1.4	54.3	20.8	-123.1	1000.9	58.5	1.4	-47.5
10-100	130	1632	1.9	25.924	32.8	0.0985	32.9	0.0185	3.2	0.1	118.3	3.8	95.4	30	-445.6	882.2	118.3	3.8	-26.6
10-101	520	7300	2.8	20.6491	5.8	0.1487	5.9	0.0223	1.1	0.19	142	1.6	140.8	7.7	120.2	135.7	142	1.6	118.1
11 - Tyonek Formation (Hatcher Pass Road, Matanuska Valley)
							Isotope ratios						Apparent ages (Ma)
Analysis	U	206Pb	U/Th	206Pb*	±	207Pb*	±	206Pb*	±	error	206Pb*	±	207Pb*	±	206Pb*	±	Best age	±	Conc
	(ppm)	204Pb		207Pb*	(%)	235U*	(%)	238U	(%)	corr.	238U*	(Ma)	235U	(Ma)	207Pb*	(Ma)	(Ma)	(Ma)	(%)
11-1	1135	9572	1.5	22.2771	19.4	0.0242	19.8	0.0039	3.8	0.19	25.1	1	24.2	4.7	-61.6	477.9	25.1	1	NA
11-2	607	5325	2.7	29.4556	36.9	0.0189	37.2	0.004	4.1	0.11	26	1.1	19	7	-794.2	1075.8	26	1.1	NA
11-3	822	1992	1.2	21.96	13.2	0.0256	13.3	0.0041	1.3	0.1	26.3	0.3	25.7	3.4	-26.8	320.6	26.3	0.3	NA
11-4	1232	4364	2.3	23.0205	7.1	0.0253	7.2	0.0042	1.3	0.18	27.2	0.4	25.4	1.8	-142.3	176.2	27.2	0.4	NA
11-5	3321	18622	2.3	20.3417	8.5	0.0287	8.9	0.0042	2.8	0.32	27.2	0.8	28.7	2.5	155.4	199	27.2	0.8	NA
11-6	1509	8470	3.2	22.1867	4.5	0.0462	4.5	0.0074	0.5	0.12	47.7	0.3	45.8	2	-51.7	109.5	47.7	0.3	NA
11-7	867	4566	2.9	20.9267	5.1	0.0507	5.4	0.0077	1.7	0.32	49.4	0.8	50.2	2.6	88.7	120.4	49.4	0.8	NA
11-8	403	1000	2.7	16.6431	21.1	0.0655	22.8	0.0079	8.5	0.37	50.8	4.3	64.4	14.2	606.6	461.3	50.8	4.3	NA
11-9	822	9766	2.8	22.8724	13.8	0.048	14.6	0.008	4.7	0.33	51.1	2.4	47.6	6.8	-126.4	341.9	51.1	2.4	NA
11-10	604	3894	2.7	23.041	11.2	0.0485	11.4	0.0081	1.9	0.17	52.1	1	48.1	5.3	-144.5	278.3	52.1	1	NA
11-11	373	4734	2.2	22.3713	13.7	0.05	13.9	0.0081	2.1	0.15	52.1	1.1	49.6	6.7	-72	337.2	52.1	1.1	NA
11-12	2097	35685	3.3	21.4891	2.5	0.0529	3.3	0.0082	2.1	0.63	52.9	1.1	52.3	1.7	25.4	60.6	52.9	1.1	NA
11-13	629	7265	2.7	21.4943	7.8	0.0532	8	0.0083	1.8	0.23	53.2	1	52.6	4.1	24.8	187.8	53.2	1	NA
11-14	308	3240	2.2	23.7235	15.8	0.0483	15.9	0.0083	1.5	0.1	53.3	0.8	47.9	7.4	-217.4	400.1	53.3	0.8	NA
11-15	393	18212	2	22.0891	18.4	0.0522	18.7	0.0084	3.7	0.2	53.7	2	51.7	9.4	-41	449.5	53.7	2	NA
11-16	513	5429	3.3	22.4417	9.9	0.0519	10.4	0.0085	3.2	0.31	54.3	1.7	51.4	5.2	-79.6	243.5	54.3	1.7	NA
11-17	185	2344	2.4	25.1347	24.5	0.0464	24.7	0.0085	3.2	0.13	54.3	1.7	46	11.1	-364.8	642.7	54.3	1.7	NA
11-18	237	2465	2.9	18.7819	37.7	0.0621	38.1	0.0085	5.6	0.15	54.3	3	61.2	22.6	339.1	882.8	54.3	3	NA
11-19	843	6692	2.2	21.7855	5.3	0.0539	5.5	0.0085	1.3	0.23	54.6	0.7	53.3	2.8	-7.5	128.8	54.6	0.7	NA
11-20	246	1948	5	16.412	40.2	0.0717	40.3	0.0085	3	0.07	54.8	1.6	70.3	27.4	636.8	899.1	54.8	1.6	NA
11-21	412	4340	3.7	23.5709	13.4	0.0499	13.7	0.0085	2.9	0.21	54.8	1.6	49.5	6.6	-201.2	336.1	54.8	1.6	NA
11-22	2056	16546	2.3	21.5042	4	0.0547	4.1	0.0085	1.2	0.29	54.8	0.7	54.1	2.2	23.7	95	54.8	0.7	NA
11-23	244	3814	2.6	25.9981	19.3	0.0453	19.4	0.0085	2	0.1	54.9	1.1	45	8.6	-453.1	513.7	54.9	1.1	NA
11-24	1204	34595	2.4	20.3586	6.7	0.0586	7.2	0.0087	2.5	0.35	55.5	1.4	57.8	4	153.5	157.8	55.5	1.4	NA
11-25	581	13697	2	21.1845	13.9	0.0565	14.7	0.0087	4.6	0.31	55.7	2.6	55.8	8	59.6	333.4	55.7	2.6	NA
11-26	183	1300	2.9	24.6752	26.8	0.0485	26.9	0.0087	1.9	0.07	55.8	1	48.1	12.6	-317.3	697.3	55.8	1	NA
11-27	280	4725	4.2	24.2797	47	0.0495	47.3	0.0087	4.9	0.1	56	2.8	49.1	22.7	-276	1257.9	56	2.8	NA
11-28	874	7880	3.2	21.8432	4.1	0.0551	4.1	0.0087	0.6	0.15	56	0.3	54.5	2.2	-13.9	98.9	56	0.3	NA
11-29	382	4176	2.2	20.3473	12.5	0.0594	13.1	0.0088	3.7	0.28	56.2	2.1	58.5	7.4	154.9	294.7	56.2	2.1	NA
11-30	120	2083	3.9	18.0077	253.5	0.0672	253.7	0.0088	8.9	0.04	56.3	5	66	163.6	433.7	0	56.3	5	NA
11-31	791	5811	1.4	19.5151	10.3	0.062	10.7	0.0088	2.8	0.26	56.4	1.6	61.1	6.3	251.8	237.8	56.4	1.6	NA
11-32	291	5649	2.5	29.4942	37.9	0.0411	37.9	0.0088	2.6	0.07	56.4	1.5	40.9	15.2	-797.9	1105.6	56.4	1.5	NA
11-33	1530	31731	2.4	22.0095	8.3	0.0556	8.8	0.0089	2.8	0.32	56.9	1.6	54.9	4.7	-32.2	202.6	56.9	1.6	NA
11-34	238	2634	4	28.4761	28.1	0.043	28.3	0.0089	3.3	0.12	57.1	1.9	42.8	11.8	-699.3	791.9	57.1	1.9	NA
11-35	690	6188	2.4	21.5606	11.3	0.0572	11.3	0.0089	0.9	0.08	57.4	0.5	56.5	6.2	17.4	271	57.4	0.5	NA
11-36	563	6123	2	22.7183	12	0.0544	12.6	0.009	3.6	0.28	57.5	2	53.8	6.6	-109.7	297.5	57.5	2	NA
11-37	980	7466	3.5	21.5505	5.6	0.0575	5.8	0.009	1.3	0.23	57.7	0.7	56.7	3.2	18.6	134.9	57.7	0.7	NA
11-38	588	1794	5.3	17.8051	16.6	0.0696	16.7	0.009	2.1	0.13	57.7	1.2	68.3	11	458.8	369.5	57.7	1.2	NA
11-39	329	4566	2.4	20.9962	17.6	0.0597	17.6	0.0091	1.2	0.07	58.4	0.7	58.9	10.1	80.8	419.8	58.4	0.7	NA
11-40	684	3844	1.7	21.9654	6.9	0.0571	7.1	0.0091	1.7	0.24	58.4	1	56.4	3.9	-27.4	167.5	58.4	1	NA
11-41	613	8533	1.9	21.4874	10.1	0.0585	10.5	0.0091	2.8	0.27	58.5	1.6	57.7	5.9	25.6	243.3	58.5	1.6	NA
11-42	1004	4288	4.6	21.8445	5.6	0.0578	5.9	0.0092	1.9	0.32	58.8	1.1	57.1	3.3	-14	136.2	58.8	1.1	NA
11-43	311	7978	3.7	19.4306	10.5	0.065	11.6	0.0092	4.8	0.42	58.8	2.8	64	7.2	261.7	242.4	58.8	2.8	NA
11-44	960	6014	2.2	22.197	5.4	0.0569	5.4	0.0092	0.5	0.1	58.8	0.3	56.2	3	-52.9	131.2	58.8	0.3	NA
11-45	502	10937	2.2	20.1699	10	0.0627	10.4	0.0092	2.8	0.27	58.9	1.7	61.8	6.2	175.3	232.9	58.9	1.7	NA
11-46	593	9888	2.5	21.43	14.4	0.0592	14.7	0.0092	3	0.2	59.1	1.8	58.4	8.3	32.1	346.1	59.1	1.8	NA
11-47	761	4992	2.4	21.0874	6.4	0.0603	6.8	0.0092	2.3	0.34	59.2	1.4	59.5	3.9	70.5	151.6	59.2	1.4	NA
11-48	939	12226	1.9	20.3853	8.3	0.0627	9	0.0093	3.3	0.37	59.5	2	61.7	5.4	150.4	195.3	59.5	2	NA
11-49	501	1880	2.2	20.7249	7.6	0.0617	7.8	0.0093	2	0.25	59.5	1.2	60.8	4.6	111.6	179.3	59.5	1.2	NA
11-50	349	1580	1.8	21.5364	13.4	0.0597	13.8	0.0093	3	0.22	59.8	1.8	58.9	7.9	20.2	323.7	59.8	1.8	NA
11-51	2005	35022	5.6	21.7177	4	0.0593	4.1	0.0093	1	0.24	59.9	0.6	58.5	2.3	0	95.4	59.9	0.6	NA
11-52	387	2742	2.3	21.7699	10.7	0.0592	10.9	0.0093	2	0.18	59.9	1.2	58.4	6.2	-5.8	259.9	59.9	1.2	NA
11-53	1098	17812	1.7	20.0841	5.7	0.0643	6.2	0.0094	2.5	0.4	60.1	1.5	63.3	3.8	185.2	132.1	60.1	1.5	NA
11-54	320	23668	2.7	20.3724	8.9	0.0635	9	0.0094	1.3	0.15	60.2	0.8	62.6	5.5	152	209.7	60.2	0.8	NA
11-55	173	5345	4	32.8738	39.7	0.0397	39.9	0.0095	4.1	0.1	60.7	2.5	39.5	15.5	-1116.4	1246.7	60.7	2.5	NA
11-56	458	3362	1.5	22.6742	10.2	0.058	10.5	0.0095	2.2	0.21	61.2	1.4	57.2	5.8	-104.9	252	61.2	1.4	NA
11-57	499	14893	3.1	23.0426	10.8	0.0572	11.2	0.0096	2.9	0.26	61.4	1.8	56.5	6.2	-144.7	268.6	61.4	1.8	NA
11-58	758	24692	3.1	20.8838	5.7	0.0633	8.4	0.0096	6.2	0.73	61.5	3.8	62.3	5.1	93.6	135.1	61.5	3.8	NA
11-59	406	3274	1.7	19.4906	10.5	0.0679	10.7	0.0096	1.6	0.15	61.6	1	66.7	6.9	254.6	242.8	61.6	1	NA
11-60	549	5510	3.4	21.6378	5	0.0619	5.2	0.0097	1.3	0.26	62.3	0.8	61	3.1	8.9	120.6	62.3	0.8	NA
11-61	416	3936	2.2	22.59	8	0.0596	8	0.0098	0.5	0.06	62.7	0.3	58.8	4.6	-95.8	196.1	62.7	0.3	NA
11-62	1213	15088	8.3	20.409	4.4	0.066	4.5	0.0098	0.8	0.17	62.7	0.5	64.9	2.8	147.7	103.1	62.7	0.5	NA
11-63	352	2166	2.5	21.3743	16.8	0.0634	16.8	0.0098	0.6	0.03	63	0.4	62.4	10.2	38.3	404.5	63	0.4	NA
11-64	503	3778	3	22.5663	9.1	0.06	9.2	0.0098	0.9	0.1	63	0.6	59.2	5.3	-93.2	224.9	63	0.6	NA
11-65	341	1101	1.5	17.9481	13.4	0.0763	13.8	0.0099	3.3	0.24	63.7	2.1	74.7	10	441.1	299.8	63.7	2.1	NA
11-66	1774	34952	2.9	20.8788	3.6	0.0657	3.9	0.0099	1.5	0.39	63.8	1	64.6	2.5	94.1	85.8	63.8	1	NA
11-67	423	7169	5.3	20.1772	12.2	0.0682	12.6	0.01	3.1	0.25	64.1	2	67	8.1	174.4	284.4	64.1	2	NA
11-68	327	5516	4.3	19.3401	15.8	0.0714	16.2	0.01	3.5	0.22	64.3	2.2	70.1	11	272.4	365.1	64.3	2.2	NA
11-69	752	13754	1.6	19.1698	10.4	0.0726	11.7	0.0101	5.4	0.46	64.8	3.5	71.2	8.1	292.7	237.4	64.8	3.5	NA
11-70	1435	30664	6.2	21.1748	3.8	0.0664	4.6	0.0102	2.4	0.54	65.4	1.6	65.3	2.9	60.7	91.7	65.4	1.6	NA
11-71	703	13089	4	23.0383	6	0.0611	6.5	0.0102	2.4	0.37	65.5	1.6	60.2	3.8	-144.2	150	65.5	1.6	NA
11-72	452	4606	3.6	20.9423	14.9	0.0678	15	0.0103	1.1	0.07	66	0.7	66.6	9.6	86.9	355.7	66	0.7	NA
11-73	392	3768	2.7	23.0355	10.1	0.0618	10.2	0.0103	1	0.1	66.2	0.7	60.9	6	-143.9	250.8	66.2	0.7	NA
11-74	255	8936	3.8	22.6158	20.8	0.0639	20.9	0.0105	1.4	0.07	67.3	1	62.9	12.7	-98.6	515.9	67.3	1	NA
11-75	629	8010	4	21.7697	6.1	0.0668	6.6	0.0105	2.7	0.4	67.6	1.8	65.7	4.2	-5.7	146.6	67.6	1.8	NA
11-76	251	3332	4.5	20.8677	12.1	0.0705	12.2	0.0107	1.6	0.13	68.4	1.1	69.2	8.1	95.4	286.9	68.4	1.1	NA
11-77	2295	18416	1.9	21.3918	2.3	0.0693	3.3	0.0107	2.3	0.71	68.9	1.6	68	2.2	36.3	56.2	68.9	1.6	NA
11-78	359	23760	5.8	20.9411	8.9	0.0718	9	0.0109	0.7	0.08	70	0.5	70.4	6.1	87.1	212.1	70	0.5	NA
11-79	344	3240	2.6	23.7777	12.5	0.0634	12.5	0.0109	0.5	0.04	70.1	0.3	62.4	7.5	-223.1	314.5	70.1	0.3	NA
11-80	373	3306	2.8	23.506	13.7	0.0641	14	0.0109	2.8	0.2	70.1	1.9	63.1	8.6	-194.3	344.2	70.1	1.9	NA
11-81	798	15792	3	20.6619	6.9	0.0737	7.3	0.011	2.4	0.33	70.8	1.7	72.2	5.1	118.8	163.8	70.8	1.7	NA
11-82	122	2412	4.5	27.6775	60	0.055	60	0.0111	2.5	0.04	70.8	1.8	54.4	31.8	-621	1782.2	70.8	1.8	NA
11-83	380	6136	2	22.2039	7.8	0.0694	8.1	0.0112	2.1	0.26	71.6	1.5	68.1	5.3	-53.6	189.9	71.6	1.5	NA
11-84	436	2542	6.2	20.6123	6.2	0.0751	6.3	0.0112	1.2	0.19	71.9	0.9	73.5	4.5	124.4	145.6	71.9	0.9	NA
11-85	106	5001	1.6	19.1582	47.4	0.0813	47.7	0.0113	6	0.13	72.4	4.3	79.4	36.5	294	1141.7	72.4	4.3	NA
11-86	1015	16742	10.5	21.0638	2	0.074	2.2	0.0113	0.8	0.37	72.5	0.6	72.5	1.5	73.2	47.7	72.5	0.6	NA
11-87	1088	16658	26.2	21.5739	2.9	0.073	4.8	0.0114	3.9	0.8	73.3	2.8	71.6	3.3	16	69.2	73.3	2.8	NA
11-88	549	5616	2.6	21.678	10.4	0.073	10.5	0.0115	1.3	0.13	73.6	1	71.6	7.2	4.4	251.1	73.6	1	NA
11-89	849	13512	5.7	20.3852	2.8	0.078	3	0.0115	1.1	0.35	73.9	0.8	76.2	2.2	150.5	66.2	73.9	0.8	NA
11-90	231	720	3	17.9791	19.8	0.0886	20.6	0.0116	5.5	0.27	74	4	86.2	17	437.2	445.8	74	4	NA
11-91	121	1500	3	21.8213	23.6	0.0732	23.9	0.0116	4	0.17	74.3	2.9	71.7	16.6	-11.5	576.2	74.3	2.9	NA
11-92	480	18987	2.7	21.5141	10.5	0.0749	10.6	0.0117	1.9	0.18	74.9	1.4	73.3	7.5	22.7	251.4	74.9	1.4	NA
11-93	608	12146	3	22.3294	7.4	0.0725	7.5	0.0117	1	0.14	75.3	0.8	71.1	5.2	-67.4	181.8	75.3	0.8	NA
11-94	266	5584	3.5	22.7084	8	0.0722	8	0.0119	0.8	0.1	76.2	0.6	70.8	5.5	-108.6	196.5	76.2	0.6	NA
11-95	583	10166	3.5	21.1401	5.6	0.0778	5.9	0.0119	1.9	0.32	76.5	1.5	76.1	4.4	64.6	133.9	76.5	1.5	NA
11-96	291	4022	2.6	21.5018	18.1	0.0768	18.1	0.012	1	0.06	76.8	0.8	75.1	13.1	24	436.7	76.8	0.8	NA
11-97	143	2112	3.7	19.5977	28.2	0.0844	28.3	0.012	2.2	0.08	76.9	1.7	82.3	22.3	242	661.1	76.9	1.7	NA
11-98	782	9600	1.4	22.0196	5.2	0.0753	5.2	0.012	0.9	0.17	77.1	0.7	73.7	3.7	-33.4	125.1	77.1	0.7	NA
11-99	1243	50902	0.8	21.3794	3.5	0.0776	3.8	0.012	1.5	0.4	77.1	1.2	75.9	2.8	37.7	82.9	77.1	1.2	NA
11-100	973	26247	4.2	20.9162	6.1	0.0797	6.6	0.0121	2.5	0.37	77.4	1.9	77.8	4.9	89.9	144.8	77.4	1.9	NA
11-101	606	4636	6.6	21.7828	5.2	0.0766	7.3	0.0121	5.2	0.71	77.5	4	74.9	5.3	-7.2	124.5	77.5	4	NA
11-102	387	8243	3.1	19.6214	9.6	0.0863	10.2	0.0123	3.6	0.35	78.7	2.8	84	8.2	239.3	221.3	78.7	2.8	NA
11-103	274	4772	4.8	22.8326	12.3	0.0751	12.9	0.0124	4	0.31	79.6	3.1	73.5	9.1	-122.1	304.1	79.6	3.1	NA
11-104	332	3782	3.8	22.9144	9.5	0.0753	9.6	0.0125	1.2	0.12	80.1	0.9	73.7	6.8	-130.9	236	80.1	0.9	NA
11-105	178	350	2.4	14.6182	27.6	0.1181	28.8	0.0125	8.4	0.29	80.2	6.7	113.4	31	880.9	581.5	80.2	6.7	NA
11-106	108	1195	3.1	15.4104	33.5	0.1139	34.3	0.0127	7.1	0.21	81.5	5.7	109.5	35.6	770.8	725.5	81.5	5.7	NA
11-107	103	2039	3.4	19.9612	126.2	0.0894	126.5	0.0129	9.8	0.08	82.9	8.1	87	105.9	199.5	1105.3	82.9	8.1	NA
11-108	226	7376	1.6	28.5239	28.8	0.0632	28.9	0.0131	2.2	0.08	83.7	1.8	62.2	17.4	-704	813.6	83.7	1.8	NA
11-109	64	3251	3	12.1934	43.1	0.1483	45.7	0.0131	15.1	0.33	84	12.6	140.4	60	1245.8	887.4	84	12.6	6.7
11-110	136	3822	3.2	23.8836	52.3	0.0761	52.5	0.0132	4.1	0.08	84.4	3.4	74.5	37.7	-234.3	1407.1	84.4	3.4	NA
11-111	620	7979	2	20.0042	6.2	0.0926	8.1	0.0134	5.3	0.65	86	4.5	89.9	7	194.5	144	86	4.5	NA
11-112	47	1015	2.4	25.8023	85.4	0.0722	86.6	0.0135	14.4	0.17	86.5	12.4	70.8	59.3	-433.2	2860	86.5	12.4	NA
11-113	83	3700	1.7	23.023	43.2	0.0841	43.3	0.014	2.5	0.06	89.9	2.2	82	34.1	-142.6	1116.8	89.9	2.2	NA
11-114	1541	26417	1.6	20.39	3	0.101	3.6	0.0149	2	0.56	95.6	1.9	97.7	3.4	149.9	70.7	95.6	1.9	NA
11-115	1306	22192	2	21.0896	4.4	0.099	4.9	0.0151	2	0.41	96.9	1.9	95.8	4.5	70.3	105.7	96.9	1.9	NA
11-116	1066	20936	3	20.9908	2.7	0.0996	3.4	0.0152	2.1	0.61	97	2	96.4	3.1	81.4	63	97	2	NA
11-117	1065	18948	2.9	21.3606	4.7	0.1006	4.9	0.0156	1.1	0.23	99.7	1.1	97.3	4.5	39.8	113	99.7	1.1	NA
11-118	1037	19344	1.5	20.7801	3.1	0.1059	3.4	0.016	1.3	0.38	102.1	1.3	102.2	3.3	105.3	73.4	102.1	1.3	NA
11-119	290	8429	3.8	24.9869	24	0.0898	24.3	0.0163	3.6	0.15	104.1	3.8	87.3	20.3	-349.6	627.2	104.1	3.8	NA
11-120	579	9131	2	18.2216	9.1	0.1233	10	0.0163	4	0.4	104.2	4.2	118.1	11.1	407.3	204.9	104.2	4.2	NA
11-121	522	14645	3.5	21.2118	5.9	0.106	6	0.0163	1.4	0.23	104.3	1.4	102.3	5.9	56.5	139.9	104.3	1.4	NA
11-122	1108	972	0.5	23.4997	12.1	0.0983	12.2	0.0168	0.5	0.04	107.1	0.5	95.2	11	-193.6	304.9	107.1	0.5	NA
11-123	466	7394	3.2	21.4976	5.1	0.1089	5.1	0.017	0.5	0.1	108.5	0.5	105	5.1	24.5	121.6	108.5	0.5	NA
11-124	325	5713	2.2	18.8459	12	0.1252	12.4	0.0171	3	0.24	109.4	3.3	119.8	14	331.5	274	109.4	3.3	NA
11-125	277	6980	1.3	22.3317	12.5	0.1057	12.6	0.0171	2	0.15	109.4	2.1	102	12.3	-67.6	306.1	109.4	2.1	NA
11-126	306	20067	0.9	21.7397	10.8	0.109	10.9	0.0172	1.2	0.11	109.8	1.3	105	10.9	-2.4	261.4	109.8	1.3	NA
11-127	523	1214	1.6	13.3365	26.7	0.1781	26.8	0.0172	1.2	0.05	110.1	1.3	166.4	41.1	1068	547.2	110.1	1.3	NA
11-128	1264	18608	1.4	20.8017	2.9	0.1145	3.1	0.0173	1	0.34	110.4	1.1	110.1	3.2	102.9	67.9	110.4	1.1	NA
11-129	305	7262	1.5	20.0562	11.5	0.1196	11.8	0.0174	2.8	0.23	111.2	3	114.7	12.8	188.4	267.6	111.2	3	NA
11-130	843	37838	1.2	19.985	4.1	0.1211	4.5	0.0176	1.9	0.42	112.2	2.1	116.1	4.9	196.8	94.6	112.2	2.1	NA
11-131	515	20588	1.8	21.2835	5.4	0.1143	5.6	0.0176	1.5	0.26	112.8	1.6	109.9	5.8	48.5	128.6	112.8	1.6	NA
11-132	372	5794	0.9	21.6707	5.9	0.1126	6.2	0.0177	1.9	0.31	113.1	2.1	108.3	6.3	5.2	141.4	113.1	2.1	NA
11-133	807	12382	0.8	21.0644	3.6	0.1165	3.7	0.0178	1.1	0.29	113.8	1.2	111.9	4	73.1	85.1	113.8	1.2	NA
11-134	424	5244	1	21.8964	5.8	0.114	5.8	0.0181	0.8	0.14	115.7	0.9	109.6	6.1	-19.8	139.7	115.7	0.9	NA
11-135	2155	23960	1.3	20.708	1.9	0.1242	2.3	0.0187	1.3	0.56	119.1	1.5	118.9	2.6	113.5	45.3	119.1	1.5	NA
11-136	140	5361	2.5	24.4413	26.6	0.1072	26.9	0.019	4	0.15	121.3	4.8	103.4	26.4	-292.9	688.5	121.3	4.8	NA
11-137	219	2252	1.4	20.9523	18.1	0.1254	18.5	0.0191	3.5	0.19	121.7	4.3	120	20.9	85.8	433	121.7	4.3	NA
11-138	193	12794	2	20.3331	22.6	0.131	22.9	0.0193	3.4	0.15	123.3	4.1	125	26.9	156.5	536.1	123.3	4.1	NA
11-139	407	9126	1.9	20.7636	4	0.1283	4.1	0.0193	0.8	0.2	123.4	1	122.6	4.7	107.2	94.8	123.4	1	NA
11-140	235	734	1.9	23.8509	24.4	0.1124	24.5	0.0194	2.4	0.1	124.1	3	108.1	25.1	-230.9	621.6	124.1	3	NA
11-141	180	3854	3.2	22.8003	13.4	0.1179	13.5	0.0195	1.9	0.14	124.4	2.4	113.1	14.4	-118.6	330.5	124.4	2.4	NA
11-142	392	8734	1.8	20.9956	6.4	0.13	6.5	0.0198	0.5	0.08	126.4	0.7	124.1	7.5	80.9	152.8	126.4	0.7	NA
11-143	117	5994	1.5	24.2074	42.8	0.1157	43.1	0.0203	5.7	0.13	129.7	7.4	111.2	45.5	-268.4	1130.7	129.7	7.4	NA
11-144	217	8569	1.4	22.0507	20.9	0.1354	21.2	0.0217	3.1	0.15	138.1	4.2	128.9	25.6	-36.8	513.2	138.1	4.2	NA
11-145	89	4334	2.3	19.4202	29.8	0.1592	30.3	0.0224	5.3	0.18	143	7.5	150	42.3	263	698.9	143	7.5	NA
11-146	143	17917	2.6	21.6592	19	0.1433	19.6	0.0225	4.7	0.24	143.5	6.6	135.9	24.9	6.5	461.8	143.5	6.6	NA
11-147	179	13521	2.7	21.6449	9.9	0.1465	10	0.023	1.9	0.19	146.6	2.8	138.8	13	8.1	237.6	146.6	2.8	NA
11-148	1373	11898	1.4	20.3532	1.6	0.1574	1.8	0.0232	0.8	0.45	148	1.2	148.4	2.5	154.1	37.7	148	1.2	NA
11-149	93	1292	1.7	22.6624	10.9	0.142	10.9	0.0233	0.8	0.07	148.7	1.1	134.8	13.8	-103.6	268	148.7	1.1	NA
11-150	314	12564	4.4	20.1692	7.9	0.1612	8.9	0.0236	4.1	0.46	150.2	6	151.7	12.5	175.4	184.3	150.2	6	NA
11-151	530	38907	2	20.7373	4.5	0.1628	6.4	0.0245	4.6	0.71	155.9	7	153.1	9.1	110.2	106	155.9	7	NA
11-152	269	4384	1.9	20.7527	3.7	0.1644	4.1	0.0247	1.7	0.41	157.6	2.6	154.6	5.8	108.4	87.8	157.6	2.6	NA
11-153	363	13786	5.1	20.4191	8	0.1674	8.3	0.0248	2.2	0.27	157.9	3.4	157.2	12.1	146.6	187.7	157.9	3.4	NA
11-154	307	18328	6.5	21.1229	4.6	0.1631	4.8	0.025	1.2	0.25	159.1	1.9	153.4	6.8	66.5	109.8	159.1	1.9	NA
11-155	92	2876	2.3	23.2516	14	0.1492	14.2	0.0252	2.5	0.18	160.2	4	141.2	18.8	-167.1	350.4	160.2	4	NA
11-156	151	6122	2.5	22.529	12.5	0.1559	12.8	0.0255	2.5	0.2	162.2	4	147.1	17.5	-89.1	308.2	162.2	4	NA
11-157	215	11336	3	21.257	11.2	0.1694	11.3	0.0261	1	0.09	166.2	1.7	158.9	16.6	51.4	268.3	166.2	1.7	NA
11-158	143	9760	6.1	25.0433	21.7	0.1459	22.1	0.0265	3.9	0.18	168.6	6.5	138.3	28.5	-355.4	566.3	168.6	6.5	NA
11-159	313	8852	1.8	20.6956	4.9	0.177	4.9	0.0266	0.6	0.13	169	1.1	165.4	7.5	114.9	115.5	169	1.1	NA
11-160	162	5982	3.7	20.5809	9.8	0.1796	10	0.0268	2.1	0.21	170.5	3.6	167.7	15.5	128.1	231	170.5	3.6	NA
11-161	347	10574	2.1	20.249	4.7	0.1829	4.9	0.0269	1.5	0.31	170.9	2.5	170.6	7.8	166.1	109.9	170.9	2.5	NA
11-162	819	32584	2.4	19.9432	2.1	0.188	3.1	0.0272	2.2	0.72	173	3.8	174.9	5	201.6	49.8	173	3.8	NA
11-163	468	15222	2	20.3367	3.7	0.193	4.1	0.0285	1.6	0.39	181	2.9	179.2	6.7	156.1	87.3	181	2.9	NA
11-164	442	16602	2	20.4413	2.2	0.1952	2.4	0.0289	0.9	0.36	183.9	1.5	181.1	4	144	52.4	183.9	1.5	NA
11-165	522	16660	2.1	20.296	2.5	0.1977	2.6	0.0291	0.8	0.29	185	1.4	183.2	4.4	160.7	58.9	185	1.4	NA
11-166	460	19232	1.7	20.49	5.6	0.1966	5.8	0.0292	1.5	0.26	185.6	2.8	182.2	9.6	138.5	130.9	185.6	2.8	NA
11-167	273	9845	1.9	22.1359	5.4	0.1879	5.9	0.0302	2.4	0.41	191.6	4.6	174.8	9.5	-46.2	131.5	191.6	4.6	NA
11-168	100	4204	1.5	20.4173	15.8	0.2049	16.4	0.0303	4.6	0.28	192.7	8.6	189.2	28.4	146.8	372.6	192.7	8.6	NA
11-169	149	12876	2.6	20.6935	16.7	0.2022	17	0.0303	3.3	0.19	192.7	6.2	187	29.1	115.2	396.2	192.7	6.2	NA
11-170	423	17212	2	19.9721	2.9	0.2169	3.3	0.0314	1.6	0.48	199.4	3	199.3	5.9	198.2	66.4	199.4	3	NA
11-171	132	8076	2.4	23.3773	17.8	0.1875	18.2	0.0318	3.7	0.2	201.7	7.4	174.5	29.2	-180.6	447.3	201.7	7.4	NA
11-172	571	30563	3	19.518	3.1	0.2247	3.4	0.0318	1.5	0.45	201.8	3.1	205.8	6.4	251.4	70.4	201.8	3.1	NA
11-173	155	6956	2.7	20.3566	10	0.2296	10.1	0.0339	1.5	0.15	214.9	3.2	209.9	19.2	153.8	234.9	214.9	3.2	NA
11-174	518	38675	2.9	19.0405	3.2	0.3444	4.1	0.0476	2.7	0.64	299.5	7.8	300.5	10.8	308.1	72.4	299.5	7.8	NA
11-175	193	20405	2.8	19.2389	4.1	0.367	6.4	0.0512	4.9	0.77	321.9	15.5	317.4	17.6	284.4	94.5	321.9	15.5	NA
11-176	237	60049	1.8	18.5091	6.3	0.4086	6.7	0.0548	2.2	0.33	344.2	7.4	347.8	19.8	372.2	142.8	344.2	7.4	NA
11-177	183	11843	2.4	18.4173	4.8	0.4163	5.5	0.0556	2.8	0.51	348.9	9.4	353.4	16.4	383.4	106.9	348.9	9.4	NA
11-178	229	47516	1.3	18.1082	2.9	0.5152	3.6	0.0677	2.1	0.59	422	8.7	421.9	12.5	421.3	65.2	422	8.7	NA
11-179	59	20129	1.1	12.2651	3.8	2.3569	5.6	0.2097	4	0.72	1227	44.9	1229.6	39.6	1234.3	75.1	1234.3	75.1	99.4
11-180	31	10539	1.3	12.1652	4.3	1.6749	7.8	0.1478	6.5	0.83	888.5	53.9	999.1	49.6	1250.3	84.6	1250.3	84.6	71.1
11-181	32	21366	0.5	7.8875	2.1	6.6578	2.6	0.3809	1.5	0.57	2080.3	26.2	2067	22.7	2053.8	37.2	2053.8	37.2	101.3
11-182	225	68910	2.9	6.1675	1.4	8.6021	5.1	0.3848	4.9	0.96	2098.6	87.6	2296.8	46.3	2478.1	23.3	2478.1	23.3	84.7
11-183	375	9272	1	6.0397	2.6	7.3301	7.9	0.3211	7.4	0.94	1795	116.1	2152.5	70.4	2513.3	44.2	2513.3	44.2	71.4
12 - Tazlina River (Richardson Highway)
							Isotope ratios						Apparent ages (Ma)
Analysis	U	206Pb	U/Th	206Pb*	±	207Pb*	±	206Pb*	±	error	206Pb*	±	207Pb*	±	206Pb*	±	Best age	±	Conc
	(ppm)	204Pb		207Pb*	(%)	235U*	(%)	238U	(%)	corr.	238U*	(Ma)	235U	(Ma)	207Pb*	(Ma)	(Ma)	(Ma)	(%)
12-1	68	2468	9.4	29.1857	41.1	0.1133	41.5	0.024	5.8	0.14	152.8	8.8	109	42.9	-768.2	1199.3	152.8	8.8	NA
12-2	252	10375	1.7	20.753	13.2	0.1478	13.3	0.0222	2.2	0.16	141.8	3	139.9	17.4	108.4	311.9	141.8	3	NA
12-3	305	9388	1.7	20.4483	7.8	0.1396	8.2	0.0207	2.5	0.31	132.1	3.3	132.7	10.2	143.2	182.8	132.1	3.3	NA
12-4	1065	108874	1.6	19.9106	1.8	0.2407	3.5	0.0348	3	0.86	220.3	6.6	219	7	205.4	42.1	220.3	6.6	NA
12-5	524	8094	3.9	22.9295	11.4	0.0646	11.5	0.0107	1.1	0.09	68.8	0.7	63.5	7.1	-132.5	283.2	68.8	0.7	NA
12-6	278	6596	2.5	21.8857	15.9	0.0697	16.9	0.0111	5.7	0.34	71	4.1	68.5	11.2	-18.6	387.4	71	4.1	NA
12-7	465	6481	1.3	22.1528	15.3	0.0619	15.5	0.0099	2.8	0.18	63.8	1.8	61	9.2	-48	373.4	63.8	1.8	NA
12-8	758	16015	3.5	22.3228	5.8	0.0748	6.9	0.0121	3.8	0.56	77.6	3	73.3	4.9	-66.6	140.6	77.6	3	NA
12-9	714	16243	3.3	22.2602	9.1	0.072	10.7	0.0116	5.6	0.53	74.5	4.2	70.6	7.3	-59.8	222	74.5	4.2	NA
12-10	170	85301	1.7	8.554	0.5	5.5703	3.1	0.3456	3	0.98	1913.4	50.3	1911.5	26.6	1909.4	9.7	1909.4	9.7	100.2
12-11	1537	54133	34.7	21.1135	2.5	0.0715	3.4	0.0109	2.3	0.66	70.2	1.6	70.1	2.3	67.6	60.5	70.2	1.6	NA
12-12	206	15006	3	19.1626	6.3	0.3464	6.6	0.0481	1.9	0.28	303.1	5.5	302	17.2	293.5	144.3	303.1	5.5	NA
12-13	474	16809	1.2	21.3375	6.8	0.1523	8.1	0.0236	4.4	0.54	150.2	6.5	144	10.8	42.4	162.2	150.2	6.5	NA
12-14	239	34200	2.6	19.8457	5.6	0.3389	6	0.0488	2	0.33	307	5.9	296.3	15.3	212.9	130.5	307	5.9	NA
12-15	110	5376	3.7	24.1882	25.1	0.1299	25.6	0.0228	5	0.2	145.2	7.2	124	29.8	-266.4	644.6	145.2	7.2	NA
12-16	504	46621	3.8	18.7707	2.3	0.3558	3.1	0.0484	2.1	0.66	304.9	6.1	309.1	8.3	340.5	52.5	304.9	6.1	NA
12-17	389	32645	2	19.5162	2.6	0.247	3.2	0.035	1.9	0.59	221.6	4.1	224.2	6.4	251.6	59.6	221.6	4.1	NA
12-18	126	7137	2.7	22.6411	16.8	0.139	17.7	0.0228	5.4	0.3	145.5	7.7	132.2	21.9	-101.3	415.9	145.5	7.7	NA
12-19	279	10475	2.8	21.3244	9.1	0.1469	9.6	0.0227	3	0.31	144.8	4.3	139.1	12.5	43.9	218.6	144.8	4.3	NA
12-20	1315	38219	1.6	21.2728	3.8	0.0784	4.1	0.0121	1.5	0.37	77.5	1.2	76.6	3.1	49.7	91.8	77.5	1.2	NA
12-21	306	32734	2.9	19.2201	2.5	0.3565	3.5	0.0497	2.5	0.72	312.7	7.7	309.6	9.4	286.7	56.3	312.7	7.7	NA
12-22	605	46455	1.9	19.4727	2.3	0.3389	3.6	0.0479	2.8	0.77	301.3	8.2	296.3	9.2	256.8	52.4	301.3	8.2	NA
12-23	580	8066	3.7	20.5857	9.4	0.0836	10	0.0125	3.7	0.37	79.9	2.9	81.5	7.9	127.5	220.5	79.9	2.9	NA
12-24	86	42783	1	8.8167	1	5.2419	2.3	0.3352	2.1	0.89	1863.5	33.7	1859.5	19.9	1854.9	18.9	1854.9	18.9	100.5
12-25	56	4138	1.9	27.0639	35.1	0.1136	36.4	0.0223	9.6	0.26	142.1	13.5	109.2	37.7	-560.2	971.2	142.1	13.5	NA
12-26	139	95916	2.4	6.1442	0.4	10.3526	1.3	0.4613	1.2	0.95	2445.4	24.2	2466.8	11.6	2484.5	6.9	2484.5	6.9	98.4
12-27	142	8263	1.9	21.8447	19.2	0.1272	19.3	0.0201	2	0.1	128.6	2.6	121.5	22.2	-14.1	468.4	128.6	2.6	NA
12-28	78	3688	4.3	20.9874	56	0.1088	59.1	0.0166	18.9	0.32	105.9	19.9	104.8	59	81.8	1437.6	105.9	19.9	NA
12-29	280	33219	3.2	20.4013	7.3	0.1855	8.1	0.0274	3.4	0.43	174.5	5.9	172.8	12.8	148.6	170.9	174.5	5.9	NA
12-30	522	50933	2	19.2947	1.8	0.3396	2.7	0.0475	2	0.75	299.3	5.9	296.9	6.9	277.8	40.2	299.3	5.9	NA
12-31	386	44781	0.9	19.4353	4.4	0.2592	4.9	0.0365	2	0.42	231.3	4.6	234	10.2	261.2	101.4	231.3	4.6	NA
12-32	625	18503	4.3	21.5082	9.3	0.0723	9.5	0.0113	2.3	0.24	72.3	1.6	70.9	6.5	23.3	222.9	72.3	1.6	NA
12-33	163	56218	2.5	13.4543	1.6	1.731	2.4	0.1689	1.8	0.75	1006.1	17.1	1020.1	15.7	1050.3	32.6	1050.3	32.6	95.8
12-34	186	7626	3.8	23.5864	19.7	0.1515	19.8	0.0259	2.7	0.14	164.9	4.4	143.2	26.5	-202.9	496.9	164.9	4.4	NA
12-35	140	4179	2.3	23.3311	29.8	0.1084	30.5	0.0183	6.2	0.2	117.2	7.2	104.5	30.3	-175.6	757.7	117.2	7.2	NA
12-36	209	10469	2.2	19.9036	17.7	0.0989	19.3	0.0143	7.5	0.39	91.4	6.8	95.8	17.6	206.2	414.1	91.4	6.8	NA
12-37	116	5483	4.2	25.0332	29.9	0.1118	30.2	0.0203	4	0.13	129.5	5.2	107.6	30.8	-354.4	787.5	129.5	5.2	NA
12-38	250	11365	2.7	21.1493	8.9	0.1353	9.4	0.0208	3	0.32	132.4	4	128.8	11.4	63.6	212.2	132.4	4	NA
12-39	152	7993	3.6	21.3351	19.3	0.1263	19.9	0.0195	4.5	0.23	124.8	5.6	120.8	22.6	42.7	466.2	124.8	5.6	NA
12-40	57	2974	1.8	20.1932	29.1	0.1582	30.8	0.0232	10.1	0.33	147.7	14.8	149.2	42.8	172.6	691.9	147.7	14.8	NA
12-41	844	49321	1.6	20.1409	2.2	0.1628	2.4	0.0238	1	0.41	151.5	1.5	153.1	3.4	178.6	50.9	151.5	1.5	NA
12-42	816	138746	8.7	18.8856	3.1	0.3435	3.8	0.0471	2.2	0.58	296.4	6.3	299.9	9.8	326.7	69.9	296.4	6.3	NA
12-43	156	21496	3.2	20.0584	8.3	0.3362	8.7	0.0489	2.5	0.29	307.9	7.5	294.3	22.2	188.2	193.7	307.9	7.5	NA
12-44	180	8128	1.3	26.1235	14.4	0.1196	15.3	0.0227	5	0.33	144.4	7.2	114.7	16.6	-465.8	382.9	144.4	7.2	NA
12-45	371	14353	3.6	21.4014	12.3	0.1016	12.5	0.0158	2.2	0.17	100.9	2.2	98.3	11.7	35.2	295.3	100.9	2.2	NA
12-46	366	7191	4.2	21.9131	20.6	0.0475	22	0.0075	7.5	0.34	48.5	3.6	47.1	10.1	-21.6	504.1	48.5	3.6	NA
12-47	185	17547	3.2	19.4645	4.2	0.3429	4.6	0.0484	1.9	0.42	304.8	5.8	299.4	12.1	257.7	97.1	304.8	5.8	NA
12-48	222	4988	4.4	24.091	37.5	0.0639	37.8	0.0112	4.8	0.13	71.6	3.4	62.9	23.1	-256.2	978.4	71.6	3.4	NA
12-49	778	118781	3.8	18.7999	2	0.3584	2.8	0.0489	2	0.72	307.6	6.1	311	7.5	337	44.3	307.6	6.1	NA
12-50	868	80935	1.5	19.045	1.9	0.3479	2.8	0.048	2.1	0.75	302.5	6.2	303.1	7.4	307.6	42.7	302.5	6.2	NA
12-51	274	12960	4.8	20.424	8.6	0.1562	9.8	0.0231	4.7	0.48	147.4	6.8	147.3	13.4	146	201.8	147.4	6.8	NA
12-52	161	6374	5.1	21.827	17.4	0.1008	19.3	0.016	8.4	0.43	102	8.5	97.5	17.9	-12.1	423.2	102	8.5	NA
12-53	525	10348	3.9	22.3456	13.7	0.0717	14	0.0116	3.2	0.23	74.4	2.4	70.3	9.5	-69.1	334.8	74.4	2.4	NA
12-54	316	10677	1.9	20.5118	5.9	0.1967	6.4	0.0293	2.5	0.39	186	4.5	182.4	10.6	135.9	137.6	186	4.5	NA
12-55	110	7802	2.5	22.2082	18.2	0.1413	19.1	0.0228	5.6	0.29	145.1	8	134.2	24	-54.1	447.2	145.1	8	NA
12-56	224	10860	3.7	24.2613	30.5	0.0644	31	0.0113	5.6	0.18	72.7	4	63.4	19.1	-274.1	791.5	72.7	4	NA
12-57	500	27699	5.4	21.2167	10.2	0.0715	10.7	0.011	3.4	0.32	70.5	2.4	70.1	7.3	55.9	243.5	70.5	2.4	NA
12-58	657	59372	2.4	18.8586	2.6	0.3661	3.3	0.0501	2.1	0.64	315	6.6	316.8	9.1	329.9	57.9	315	6.6	NA
12-59	98	7216	2.9	20.2187	29.2	0.1621	30.1	0.0238	7.3	0.24	151.4	10.9	152.5	42.7	169.6	696.1	151.4	10.9	NA
12-60	271	21687	5.1	20.4981	11.6	0.1669	11.8	0.0248	2.1	0.18	158	3.2	156.8	17.1	137.5	272.9	158	3.2	NA
12-61	165	7233	2.7	18.7348	8.9	0.1466	9.4	0.0199	3.1	0.34	127.1	4	138.9	12.2	344.8	200.7	127.1	4	NA
12-62	312	27785	3.7	19.3455	3.8	0.3389	4	0.0475	1.2	0.31	299.4	3.6	296.3	10.2	271.8	86.5	299.4	3.6	NA
12-63	414	38741	2.4	19.0203	2.5	0.3385	2.7	0.0467	1	0.38	294.2	3	296	6.9	310.5	56.6	294.2	3	NA
12-64	161	4629	2	19.5707	14.8	0.1648	15.5	0.0234	4.8	0.31	149	7.1	154.9	22.3	245.2	341.9	149	7.1	NA
12-65	1376	46896	5.9	21.0062	6.5	0.0723	7.4	0.011	3.6	0.48	70.6	2.5	70.9	5.1	79.7	155.1	70.6	2.5	NA
12-66	601	75164	2	18.6685	2.8	0.3547	3.6	0.048	2.2	0.62	302.4	6.6	308.2	9.5	352.9	63.6	302.4	6.6	NA
12-67	306	11129	4.8	20.131	11.3	0.0977	13.1	0.0143	6.7	0.51	91.3	6.1	94.6	11.9	179.8	263.2	91.3	6.1	NA
12-68	155	4750	3.7	20.6754	16.1	0.1258	16.4	0.0189	2.6	0.16	120.5	3.1	120.3	18.6	117.2	382.8	120.5	3.1	NA
12-69	232	15234	3.5	18.7971	4.4	0.3559	4.8	0.0485	1.8	0.38	305.4	5.4	309.1	12.7	337.3	100.1	305.4	5.4	NA
12-70	106	5860	3.1	32.2726	31	0.0697	31.3	0.0163	4.7	0.15	104.4	4.8	68.4	20.7	-1060.6	949.1	104.4	4.8	NA
12-71	523	7637	4.2	20.1604	4.8	0.0846	6.2	0.0124	3.9	0.63	79.3	3.1	82.5	4.9	176.4	113.1	79.3	3.1	NA
12-72	547	26147	2.6	20.7556	2.9	0.1658	3.6	0.025	2.2	0.61	158.9	3.5	155.8	5.2	108.1	67.7	158.9	3.5	NA
12-73	214	13724	3.5	19.8387	19.5	0.1646	20.1	0.0237	4.7	0.24	150.9	7	154.7	28.8	213.8	455.2	150.9	7	NA
12-74	1555	39531	3.5	21.4634	3.3	0.0775	4	0.0121	2.3	0.57	77.3	1.7	75.8	2.9	28.3	78.2	77.3	1.7	NA
12-75	107	2424	3.3	27.8372	23.8	0.0912	24	0.0184	3.4	0.14	117.6	3.9	88.6	20.4	-636.7	659.7	117.6	3.9	NA
12-76	315	7517	2.3	21.1745	4.6	0.2015	6	0.0309	3.9	0.65	196.5	7.5	186.4	10.2	60.7	109.4	196.5	7.5	NA
12-77	147	7500	2.3	18.8462	16.7	0.1703	17.5	0.0233	5.2	0.3	148.3	7.6	159.7	25.8	331.4	380.2	148.3	7.6	NA
12-78	239	6217	4	23.2559	29.3	0.0694	29.7	0.0117	5.2	0.17	75	3.9	68.1	19.6	-167.6	741.9	75	3.9	NA
12-79	160	7226	2.9	24.8663	16.4	0.0933	16.8	0.0168	3.6	0.21	107.6	3.8	90.6	14.6	-337.1	425.8	107.6	3.8	NA
12-80	337	63024	2.5	19.3502	1.4	0.3497	2.6	0.0491	2.1	0.83	308.8	6.5	304.5	6.8	271.2	32.8	308.8	6.5	NA
12-81	473	17087	3	21.077	8.1	0.0975	8.5	0.0149	2.6	0.31	95.3	2.5	94.4	7.7	71.7	193.1	95.3	2.5	NA
12-82	659	23924	3.8	21.0149	6.4	0.0756	7.4	0.0115	3.7	0.5	73.9	2.7	74	5.3	78.7	152.7	73.9	2.7	NA
12-83	215	13135	2.8	20.5815	12.6	0.1951	12.7	0.0291	2.1	0.16	185.1	3.8	181	21.1	128	296.4	185.1	3.8	NA
12-84	331	16134	2.4	20.6677	6.2	0.1673	7.3	0.0251	3.8	0.53	159.7	6	157.1	10.6	118.1	146.2	159.7	6	NA
12-85	388	10387	2.7	22.7323	4.1	0.1172	4.7	0.0193	2.5	0.52	123.4	3	112.6	5.1	-111.2	100	123.4	3	NA
12-86	256	6433	1.4	23.3028	17.4	0.0965	17.6	0.0163	2.8	0.16	104.3	2.9	93.6	15.8	-172.6	436.8	104.3	2.9	NA
12 - Tonsina River (Richardson Highway)
							Isotope ratios						Apparent ages (Ma)
Analysis	U	206Pb	U/Th	206Pb*	±	207Pb*	±	206Pb*	±	error	206Pb*	±	207Pb*	±	206Pb*	±	Best age	±	Conc
	(ppm)	204Pb		207Pb*	(%)	235U*	(%)	238U	(%)	corr.	238U*	(Ma)	235U	(Ma)	207Pb*	(Ma)	(Ma)	(Ma)	(%)
12-87	164	90131	2	9.1502	0.6	4.9425	1	0.328	0.9	0.82	1828.7	13.6	1809.5	8.8	1787.5	10.9	1787.5	10.9	102.3
12-88	143	5528	2.4	23.7509	17.1	0.1473	17.3	0.0254	2.8	0.16	161.5	4.4	139.5	22.6	-220.3	432.4	161.5	4.4	NA
12-89	568	23077	1.3	21.5198	13.2	0.1	13.4	0.0156	2.5	0.18	99.8	2.4	96.7	12.4	22	317	99.8	2.4	NA
12-90	1517	34881	1	21.4839	2.1	0.1008	3.5	0.0157	2.8	0.8	100.5	2.7	97.5	3.2	26	49.9	100.5	2.7	NA
12-91	216	28744	2	18.9119	13.3	0.2278	13.5	0.0312	1.9	0.14	198.3	3.6	208.4	25.4	323.5	304	198.3	3.6	NA
12-92	515	13332	1.5	21.1449	8.5	0.0876	9.7	0.0134	4.7	0.49	86	4.1	85.2	7.9	64	201.6	86	4.1	NA
12-93	323	32813	1.3	18.0196	2.8	0.5486	9.5	0.0717	9.1	0.96	446.4	39.3	444.1	34.3	432.2	61.3	446.4	39.3	NA
12-94	1658	74525	0.8	21.475	2.7	0.0754	3.6	0.0117	2.4	0.65	75.3	1.8	73.8	2.6	27	65.2	75.3	1.8	NA
12-95	983	16890	2.9	21.0853	4.4	0.0815	4.9	0.0125	2.1	0.43	79.9	1.7	79.6	3.7	70.8	105.2	79.9	1.7	NA
12-96	1377	25301	1.9	21.2418	3.7	0.0812	6.1	0.0125	4.8	0.79	80.2	3.8	79.3	4.6	53.1	87.9	80.2	3.8	NA
12-97	154	9323	1.9	21.3794	21.6	0.1767	22	0.0274	4.3	0.2	174.3	7.4	165.2	33.5	37.7	521	174.3	7.4	NA
12-98	55	112805	1.3	5.3775	0.5	13.0166	3.7	0.5077	3.7	0.99	2646.7	79.6	2680.9	34.9	2706.7	8.5	2706.7	8.5	97.8
12-99	122	107448	1.7	8.7723	1.1	5.2959	2	0.3369	1.7	0.84	1871.9	27.7	1868.2	17.4	1864	20	1864	20	100.4
12-100	329	13162	3	23.8764	26.7	0.0669	27	0.0116	4	0.15	74.3	3	65.8	17.2	-233.6	682.6	74.3	3	NA
12-101	473	27777	3.8	21.0077	14.2	0.0819	15.1	0.0125	5.2	0.34	79.9	4.1	79.9	11.6	79.5	338.6	79.9	4.1	NA
12-102	888	25491	2.1	21.1604	6.9	0.0763	7.8	0.0117	3.6	0.46	75.1	2.7	74.7	5.6	62.3	165.4	75.1	2.7	NA
12-103	319	19094	2.6	20.893	6.8	0.1919	7.4	0.0291	2.8	0.39	184.8	5.2	178.3	12	92.5	160.9	184.8	5.2	NA
12-104	294	38274	3.1	16.5889	1.8	0.8807	8.1	0.106	7.8	0.97	649.3	48.4	641.4	38.3	613.7	39.5	649.3	48.4	105.8
12-105	206	3866	2.4	20.7476	24	0.0825	25	0.0124	6.8	0.27	79.6	5.4	80.5	19.3	109	574.9	79.6	5.4	NA
12-106	1105	95938	7.9	16.8615	0.7	0.7515	2.1	0.0919	2	0.95	566.8	10.7	569.1	9.1	578.4	14.3	566.8	10.7	98
12-107	563	13902	3.2	23.2657	9.1	0.071	9.4	0.012	2.4	0.26	76.8	1.8	69.7	6.3	-168.6	226.8	76.8	1.8	NA
12-108	823	28849	5.4	19.4476	4	0.0864	5.3	0.0122	3.4	0.65	78.1	2.6	84.1	4.3	259.7	92.1	78.1	2.6	NA
12-109	564	16845	4.9	24.1195	13.9	0.0672	14.4	0.0118	3.8	0.26	75.3	2.8	66	9.2	-259.2	353.7	75.3	2.8	NA
12-110	1443	69358	1.4	18.6964	0.9	0.3759	6.7	0.051	6.7	0.99	320.5	20.8	324	18.6	349.5	20.5	320.5	20.8	NA
12-111	331	20791	3.1	21.8581	6.3	0.1611	6.6	0.0255	1.9	0.29	162.6	3.1	151.7	9.3	-15.5	152.4	162.6	3.1	NA
12-112	240	5597	2.5	26.7521	26.6	0.0659	27.1	0.0128	5	0.19	81.9	4.1	64.8	17	-529	723.2	81.9	4.1	NA
12-113	650	8230	3.4	21.3729	15.1	0.0727	15.5	0.0113	3.4	0.22	72.3	2.4	71.3	10.7	38.4	364.2	72.3	2.4	NA
12-114	82	59122	1	5.5907	0.5	12.2845	2.7	0.4981	2.6	0.99	2605.6	56.5	2626.4	25.1	2642.4	7.5	2642.4	7.5	98.6
12-115	198	38564	2.1	13.3298	3	1.6247	4.4	0.1571	3.2	0.72	940.5	27.7	979.8	27.5	1069.1	60.8	1069.1	60.8	88
12-116	91	1946	4	20.9921	23.9	0.114	25.4	0.0174	8.8	0.35	111	9.7	109.7	26.5	81.3	573.8	111	9.7	NA
12-117	693	18578	2.3	21.6445	8.4	0.0872	8.8	0.0137	2.6	0.29	87.6	2.2	84.9	7.2	8.1	202.9	87.6	2.2	NA
12-118	155	10546	2.8	20.3743	12.3	0.2272	12.7	0.0336	3.2	0.25	212.9	6.7	207.9	23.9	151.7	289.6	212.9	6.7	NA
12-119	283	9280	3.7	22.6155	25	0.0739	25.4	0.0121	4.6	0.18	77.7	3.6	72.4	17.8	-98.5	622.9	77.7	3.6	NA
12-120	376	6411	4.4	22.7949	15.8	0.0661	15.9	0.0109	1.7	0.11	70	1.2	65	10	-118	392	70	1.2	NA
12-121	255	3697	2.4	21.2187	25.6	0.0774	25.8	0.0119	3.2	0.12	76.3	2.4	75.7	18.8	55.7	618.8	76.3	2.4	NA
12-122	709	44469	2.7	20.1551	2.3	0.2104	3	0.0308	1.9	0.64	195.3	3.7	193.9	5.3	177	53.5	195.3	3.7	NA
12-123	68	1656	1.5	30.3072	74.3	0.0602	74.9	0.0132	9.4	0.13	84.7	7.9	59.3	43.2	-875.7	2482.4	84.7	7.9	NA
12-124	1069	127578	1.4	18.4022	1.4	0.4245	1.9	0.0567	1.3	0.68	355.3	4.6	359.3	5.8	385.2	31.6	355.3	4.6	NA
12-125	765	101205	3.6	19.1724	1.3	0.3313	3.4	0.0461	3.1	0.93	290.4	8.8	290.6	8.5	292.4	29.1	290.4	8.8	NA
12-126	400	17703	1.5	20.1406	7.2	0.1705	7.5	0.0249	2.1	0.28	158.6	3.3	159.9	11	178.7	167	158.6	3.3	NA
12-127	97	5751	2.2	26.6875	17.6	0.157	20.2	0.0304	9.9	0.49	192.9	18.8	148	27.9	-522.6	474.4	192.9	18.8	NA
12-128	246	9896	1.4	20.4292	10.5	0.1879	10.8	0.0278	2.3	0.22	177	4.1	174.8	17.3	145.4	246.9	177	4.1	NA
12-129	172	4127	2.2	20.1401	20.4	0.1664	21	0.0243	4.9	0.23	154.8	7.5	156.3	30.4	178.7	480.3	154.8	7.5	NA
12-130	493	8861	4.2	19.3205	8.4	0.0774	10	0.0108	5.3	0.53	69.5	3.7	75.7	7.3	274.7	193.5	69.5	3.7	NA
12-131	610	13041	3.2	21.5613	15.3	0.0768	15.5	0.012	3	0.19	77	2.3	75.1	11.3	17.4	368.3	77	2.3	NA
12-132	213	193820	1.5	5.4173	0.4	12.8933	4.6	0.5066	4.6	1	2642	98.9	2671.9	43.2	2694.6	5.8	2694.6	5.8	98
12-133	758	63096	1.6	20.271	4.2	0.0994	5.2	0.0146	3	0.58	93.5	2.8	96.2	4.8	163.6	99.2	93.5	2.8	NA
12-134	47	51911	1.4	8.8674	3.7	5.0882	4.1	0.3272	1.8	0.44	1825	28.3	1834.1	34.5	1844.5	66.2	1844.5	66.2	98.9
12-135	116	77097	1.3	9.1076	1	4.8202	1.5	0.3184	1.1	0.74	1781.9	17.1	1788.4	12.4	1796	18	1796	18	99.2
12-136	667	15313	2.9	20.0554	9.2	0.079	9.4	0.0115	1.8	0.19	73.7	1.3	77.2	7	188.5	214.2	73.7	1.3	NA
12-137	54	35354	2	6.2189	2.4	10.0643	7.3	0.4539	6.9	0.94	2412.7	138.7	2440.7	67.5	2464.1	40.6	2464.1	40.6	97.9
12-138	94	77439	2.5	9.1859	1.6	4.8294	2.8	0.3217	2.3	0.82	1798.3	36.2	1790	23.7	1780.4	29.6	1780.4	29.6	101
12-139	203	12250	1.9	20.3059	36.2	0.0776	37	0.0114	7.8	0.21	73.3	5.7	75.9	27.1	159.6	873	73.3	5.7	NA
12-140	462	13796	2.9	19.4924	8.7	0.0795	9	0.0112	2.2	0.25	72.1	1.6	77.7	6.7	254.4	200.3	72.1	1.6	NA
12-141	384	13063	3.1	20.7026	13.6	0.0775	14.2	0.0116	4	0.28	74.6	3	75.8	10.4	114.1	322	74.6	3	NA
12-142	437	7903	4.1	23.8108	16.9	0.0621	17.1	0.0107	3.1	0.18	68.8	2.1	61.2	10.2	-226.6	427.2	68.8	2.1	NA
12-143	211	13439	1.9	20.1122	10.2	0.169	10.6	0.0246	2.8	0.26	157	4.3	158.5	15.5	182	238.1	157	4.3	NA
12-144	385	22560	3.5	19.693	5.5	0.218	6	0.0311	2.4	0.41	197.7	4.7	200.2	10.9	230.8	126.4	197.7	4.7	NA
12-145	488	12822	5.8	21.8811	8.9	0.0966	9.4	0.0153	3	0.32	98.1	2.9	93.6	8.4	-18.1	214.9	98.1	2.9	NA
12-146	572	200991	69	7.8063	0.5	6.3137	5.3	0.3575	5.3	1	1970.1	89.3	2020.4	46.3	2072.1	8.4	2072.1	8.4	95.1
12-147	358	70910	1.9	19.7304	8.1	0.2189	8.2	0.0313	1.5	0.19	198.9	3	201	15	226.5	186.7	198.9	3	NA
12-148	470	49658	8.2	18.7428	3.1	0.4352	3.6	0.0592	1.9	0.51	370.5	6.7	366.8	11.2	343.9	71.1	370.5	6.7	NA
12-149	1885	342049	0.9	19.0542	0.7	0.3623	3.4	0.0501	3.4	0.98	315	10.3	313.9	9.3	306.5	16.9	315	10.3	NA
12-150	469	129914	1.9	17.6366	1.9	0.559	4.3	0.0715	3.8	0.89	445.2	16.4	450.9	15.5	479.9	42.4	445.2	16.4	NA
12-151	241	18084	2.3	19.5474	7.3	0.2104	7.7	0.0298	2.5	0.32	189.5	4.6	193.9	13.6	248	168.2	189.5	4.6	NA
12-152	226	15739	3.6	19.4123	11.4	0.1796	11.8	0.0253	3	0.25	161	4.8	167.7	18.2	263.9	262.1	161	4.8	NA
12-153	233	4917	2.6	24.7845	25.5	0.0681	26.5	0.0122	7.3	0.28	78.4	5.7	66.9	17.2	-328.6	664.8	78.4	5.7	NA
12-154	80	1623	0.3	17.8991	15.2	0.3899	16.8	0.0506	7	0.42	318.3	21.9	334.3	47.8	447.1	339.6	318.3	21.9	NA
12-155	146	149774	2	8.7723	0.9	5.0989	1.8	0.3244	1.6	0.86	1811.2	24.8	1835.9	15.5	1864	16.9	1864	16.9	97.2
12-156	1599	8658	5.7	19.3506	7.1	0.0856	7.4	0.012	1.7	0.23	77	1.3	83.4	5.9	271.2	164	77	1.3	NA
12-157	80	19628	1.7	15.9426	5.3	0.9758	6.4	0.1128	3.5	0.56	689.2	23.2	691.5	32	698.9	112.8	689.2	23.2	98.6
12-158	411	22947	2.3	20.4893	6.4	0.1659	8	0.0247	4.9	0.61	157	7.6	155.9	11.6	138.5	150.5	157	7.6	NA
12-159	1005	11532	3.5	22.2783	7.2	0.0708	7.4	0.0114	1.6	0.22	73.3	1.2	69.4	4.9	-61.8	175.6	73.3	1.2	NA
12-160	72	2743	3.4	14.7313	29	0.1343	29.7	0.0143	6	0.2	91.8	5.5	128	35.7	865	614.8	91.8	5.5	NA
12-161	908	110278	1.6	18.6469	1.3	0.4292	2	0.058	1.6	0.76	363.7	5.5	362.6	6.2	355.5	29.6	363.7	5.5	NA
12-162	459	53427	1.3	21.1033	4.2	0.1649	5.7	0.0252	3.9	0.68	160.7	6.2	155	8.2	68.7	99.8	160.7	6.2	NA
12-163	152	30676	0.8	16.6695	4.7	0.8406	7.5	0.1016	5.9	0.78	623.9	34.9	619.5	34.8	603.2	101.2	623.9	34.9	103.4
12-164	302	17918	1.9	18.7957	4.1	0.4199	4.3	0.0572	1.1	0.26	358.8	3.9	356	12.9	337.5	93.7	358.8	3.9	NA
12-165	392	5787	6.2	22.5699	16.5	0.0681	17.4	0.0111	5.7	0.33	71.5	4	66.9	11.3	-93.6	406	71.5	4	NA
12-166	188	218023	1.6	5.3648	0.3	13.6282	1.7	0.5303	1.7	0.98	2742.5	37.6	2724.2	16.2	2710.7	5.7	2710.7	5.7	101.2
12-167	170	16191	2.4	20.3085	8.8	0.2488	9.1	0.0366	2.4	0.26	232	5.4	225.6	18.4	159.3	205.1	232	5.4	NA
12-168	208	5971	3.1	18.579	21.2	0.0955	21.2	0.0129	1.7	0.08	82.4	1.4	92.6	18.8	363.7	482.3	82.4	1.4	NA
12-169	396	13679	3.8	19.9081	9.5	0.0843	10.2	0.0122	3.5	0.34	78	2.7	82.1	8	205.7	221.7	78	2.7	NA
12-170	347	5793	3.7	23.4492	34.1	0.0625	34.7	0.0106	6.7	0.19	68.1	4.5	61.5	20.8	-188.3	874	68.1	4.5	NA
12-171	280	6997	1.4	20.6089	15.8	0.0785	17.1	0.0117	6.3	0.37	75.2	4.7	76.8	12.6	124.8	375.1	75.2	4.7	NA
12-172	733	26384	3.1	21.9199	9.3	0.0722	9.6	0.0115	2.7	0.27	73.6	1.9	70.8	6.6	-22.4	224.8	73.6	1.9	NA
12-173	295	36881	2.1	19.2375	6.1	0.2468	6.6	0.0344	2.6	0.39	218.3	5.6	224	13.4	284.6	139.9	218.3	5.6	NA
12-174	799	26518	2.4	21.1329	8.6	0.0781	9	0.012	2.7	0.3	76.7	2	76.4	6.6	65.4	203.9	76.7	2	NA
12-175	412	18197	1.8	21.0982	6.4	0.1289	7.1	0.0197	3.1	0.44	125.9	3.8	123.1	8.2	69.3	151.4	125.9	3.8	NA
12-176	642	11973	2.3	19.3041	4.9	0.0879	6.2	0.0123	3.9	0.62	78.8	3	85.5	5.1	276.7	111.9	78.8	3	NA
12-177	144	105163	2.3	8.7649	1	5.357	3.4	0.3405	3.3	0.96	1889.3	54.1	1878	29.5	1865.6	17.8	1865.6	17.8	101.3
12-178	593	31575	1.6	21.196	9.7	0.0994	9.9	0.0153	1.6	0.16	97.8	1.6	96.2	9.1	58.3	232.7	97.8	1.6	NA
12-179	401	9454	4.5	21.3421	8.8	0.0766	9.5	0.0119	3.6	0.38	76	2.7	75	6.9	41.9	210.8	76	2.7	NA
12-180	302	5563	5.5	22.6436	16.1	0.0691	16.6	0.0113	4.2	0.25	72.7	3	67.8	10.9	-101.6	396.8	72.7	3	NA
12-181	102	2911	1.7	19.7565	19.4	0.1757	21.4	0.0252	9	0.42	160.3	14.3	164.4	32.5	223.4	453.1	160.3	14.3	NA
12-182	487	11040	4.1	21.204	11.7	0.0774	12	0.0119	2.9	0.24	76.3	2.2	75.7	8.8	57.4	279.6	76.3	2.2	NA
12-183	207	12478	3.3	22.8991	18.9	0.0715	19.5	0.0119	4.8	0.24	76.1	3.6	70.1	13.2	-129.2	470	76.1	3.6	NA
